# Supplementary material for: Male- and female-specific reproductive risk factors across the lifespan for dementia or cognitive decline: a systematic review and meta-analysis
Source: Springer Nature journal article supplement (doi:10.1186/s12916-023-03159-0), 2023-11-23

**Male- and female-specific reproductive risk factors across the lifespan for dementia or cognitive decline: A systematic review and meta-analysis**

Appendix A Newcastle-Ottawa quality assessment scale-cohort studies.....1

Appendix B Newcastle-Ottawa quality assessment scale-case control studies.....4

Appendix C Quality assessment according to the Newcastle-Ottawa Scale of cohort studies and case-control studies. ....6

Appendix D Grading approaches used to assess the credibility of meta-analysis.....10

Appendix E Characteristics of included studies. ....12

Appendix F Measurement of the outcomes on included studies.....30

Appendix G Characteristics of studies with cognitive decline, dementia, and AD.....35

1.Characteristics of studies with cognitive decline, dementia, and AD by menstrual and parity .....35

    a. Characteristics of studies with cognitive decline, dementia, and AD by age at menarche.....35

    b. Characteristics of studies with cognitive decline, dementia, and AD by length of menstrual cycle.....38

    c. Characteristics of studies with cognitive decline, dementia, and AD by menstrual regularity..... 39

|                                                                                                                                                        |    |
|--------------------------------------------------------------------------------------------------------------------------------------------------------|----|
| d. Characteristics of studies with cognitive decline, dementia, and AD by age at menopause.....                                                        | 40 |
| e. Characteristics of studies with cognitive decline, dementia, and AD by reproductive period.....                                                     | 46 |
| f. Characteristics of studies with cognitive decline, dementia, and AD by age at first birth.....                                                      | 49 |
| g. Characteristics of studies with cognitive decline, dementia, and AD by parity.....                                                                  | 51 |
| h. Characteristics of studies with cognitive decline, dementia, and AD by miscarriage and stillbirth.....                                              | 55 |
| i. Characteristics of studies with cognitive decline, dementia, and AD by breastfeeding.....                                                           | 57 |
| 2.Characteristics of studies with cognitive decline, dementia, and AD by gynecologic surgery.....                                                      | 59 |
| a. Characteristics of studies with cognitive decline, dementia, and AD by surgical menopause.....                                                      | 59 |
| b. Characteristics of studies with cognitive decline, dementia, and AD by oophorectomy, hysterectomy, and hysterectomy with bilateral oophorectomy.... | 60 |
| 3.Characteristics of studies with cognitive decline, dementia, and AD by pregnancy-related diseases.....                                               | 63 |
| 4.Characteristics of studies with cognitive decline, dementia, and AD by sex hormones in female.....                                                   | 64 |
| a. Characteristics of studies with cognitive decline, dementia, and AD by estradiol in female.....                                                     | 64 |
| b. Characteristics of studies with cognitive decline, dementia, and AD by testosterone in female.....                                                  | 67 |

|                                                                                                                               |    |
|-------------------------------------------------------------------------------------------------------------------------------|----|
| c. Characteristics of studies with cognitive decline, dementia, and AD by estrone and SHBG in female.....                     | 69 |
| 5.Characteristics of studies with cognitive decline, dementia, and AD by male-specific diseases.....                          | 70 |
| 6.Characteristics of studies with cognitive decline, dementia, and AD by sex hormones in male.....                            | 76 |
| a. Characteristics of studies with cognitive decline, dementia, and AD by estradiol in male.....                              | 76 |
| b. Characteristics of studies with cognitive decline, dementia, and AD by testosterone in male.....                           | 79 |
| c. Characteristics of studies with cognitive decline, dementia, and AD by estrone, SHBG, LH, dihydrotestosterone in male..... | 83 |
| Appendix H Results of dose-response analysis between certain factors and relative risks of dementia or cognitive decline..... | 85 |
| Appendix I Results of subgroup analysis on ADT.....                                                                           | 87 |
| 1. Subgroup analysis between races.....                                                                                       | 87 |
| 2. Subgroup analysis between mean follow-up years.....                                                                        | 88 |
| 3. Subgroup analysis between sample sizes.....                                                                                | 89 |
| 4. Subgroup analysis between NOS scores.....                                                                                  | 90 |
| Appendix J Detailed GRADE score on credibility of the meta-analysis on dementia or cognitive decline.....                     | 91 |

Appendix K Results of systemic reviews.....95

- 1. Results of systemic reviews in female-specific reproductive factors.....95
- 2. Results of systemic reviews in male-specific reproductive factors.....99

Appendix L Results of index S divergence.....101

- 1. Results of index S divergence in female-specific reproductive factors.....101
- 2. Results of index S divergence in male-specific reproductive factors.....102

Appendix A Newcastle-Ottawa quality assessment scale-cohort studies.

| Risk of bias                                                                     | Questions                                                              | Scores         | Standards                                                                                                                                                                                                                                                 |
|----------------------------------------------------------------------------------|------------------------------------------------------------------------|----------------|-----------------------------------------------------------------------------------------------------------------------------------------------------------------------------------------------------------------------------------------------------------|
| Selection<br>(generalizability, assessment bias and potential reverse causality) | Q1. representativeness of the exposed cohort                           | ☆              | a) randomly selected or<br>b) database covering very large population or<br>c) participation rate (PR) is $\geq 90\%$ or<br>d) reported there is no difference in important characteristics between those who agreed to participate and those who did not |
|                                                                                  |                                                                        | 0.5☆           | PR varies from 70% to 90% with no reporting of significant difference in important characteristics between those who agreed to participate and those who did not                                                                                          |
|                                                                                  |                                                                        | 0              | Selected group of users e.g. nurses, volunteers or no description                                                                                                                                                                                         |
|                                                                                  | Q2. selection of the non-exposed cohort                                | ☆              | Drawn from the same community as the exposed cohort                                                                                                                                                                                                       |
|                                                                                  |                                                                        | 0              | Drawn from a different source or no description of the derivation of the non-exposed cohort                                                                                                                                                               |
|                                                                                  | Q3. ascertainment of exposure                                          | ☆              | Questionnaire or interview based on self-report to series questions or database                                                                                                                                                                           |
|                                                                                  |                                                                        | 0.5☆           | Self-report to simple question with potential recall bias                                                                                                                                                                                                 |
|                                                                                  |                                                                        | 0              | No description                                                                                                                                                                                                                                            |
|                                                                                  | Q4. demonstration that outcome of interest was not present at baseline | ☆              | Cognitively intact for outcome as dementia or MCI; Free of dementia for population with MCI at baseline                                                                                                                                                   |
|                                                                                  |                                                                        | 0.5☆           | Free of dementia (cognitively intact & cognitive impairment no dementia (CIND)) for outcome of dementia                                                                                                                                                   |
| 0                                                                                |                                                                        | No description |                                                                                                                                                                                                                                                           |
| Confounding bias                                                                 | Q5. comparability of cohorts on the basis of the design or analysis    | ☆☆             | Except for age, sex, and education, the analysis still controls for at least another two domains of AD risk factors, including <i>APOE4</i> , pre-existing disease, lifestyle, medical exposure, biochemical exposure, occupation, diet, etc.             |
|                                                                                  |                                                                        | ☆              | Controls for age, sex and education                                                                                                                                                                                                                       |
|                                                                                  |                                                                        | 0              | No description                                                                                                                                                                                                                                            |
| Outcome (assessment)                                                             | Q6. assessment of outcome                                              | ☆              | Independent or blind assessment                                                                                                                                                                                                                           |

|                                                    |       |                                                                                      |
|----------------------------------------------------|-------|--------------------------------------------------------------------------------------|
| bias and attrition bias)                           | 0.5 ☆ | Record linkage (e.g. identified through ICD codes on database records or claim data) |
|                                                    | 0     | Self-report or no description                                                        |
| Q7. follow-up long enough for outcomes to occur? # | ☆     | The average or max duration reached the lower 95% CI.                                |
|                                                    | 0     | The average or max duration did not reach the lower 95% CI.                          |
| Q8. adequacy of follow up of cohorts*              | ☆     | Attrition rate $\leq 5\%$                                                            |
|                                                    | 0.5 ☆ | $5\% \leq \text{Attrition rate} \leq 20\%$                                           |
|                                                    | 0     | Attrition rate $> 20\%$ and no description of those lost or no description           |

A maximum of two stars can be given for Comparability. In the involving version, an assignment of a half point (0.5) is permitted.

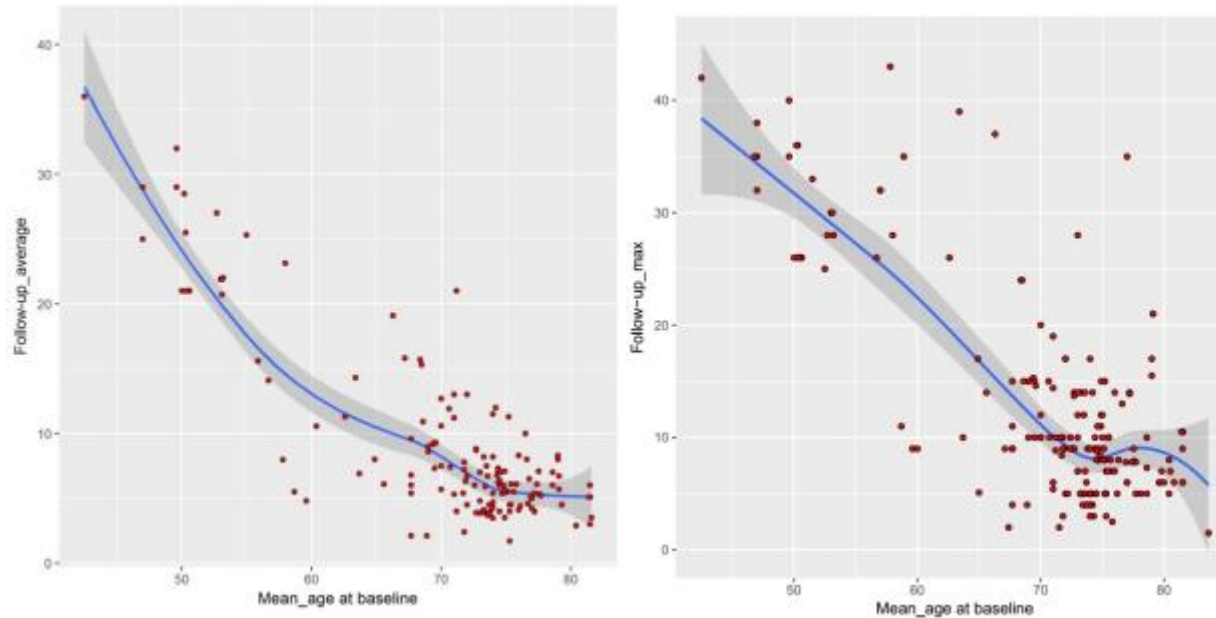

#Figure: It is obviously absurd to define a common period for population with diverse age range at baseline. A presumable negative correlation was reasonably supposed to exist between so-called adequate follow-up period and average age of population at baseline. Here, we will draw the nonlinear regression line with its 95% confidence

interval (CI) for the association between the mean/max follow-up duration and mean age of population at baseline for AD cohorts (unpublished data). We will predefine that the follow-up is adequate if the average or max duration reach the lower 95% CI.

\*It has been indicated that a rate of loss < 5% probably leads to little bias, whereas a rate of loss that is greater than 20% potentially poses serious threats to validity.

Appendix B Newcastle-Ottawa quality assessment scale-case control studies.

| Risk of bias               | Questions                                                                      | Scores                           | Standards                                                                                            |
|----------------------------|--------------------------------------------------------------------------------|----------------------------------|------------------------------------------------------------------------------------------------------|
| <b>Selection</b>           | Q1. Is the case definition adequate?                                           | ☆                                | Yes, with independent validation                                                                     |
|                            |                                                                                | 0.5☆                             | Yes, eg record linkage or based on self-reports                                                      |
|                            |                                                                                | 0                                | No description                                                                                       |
|                            | Q2. Representativeness of the cases                                            | ☆                                | Consecutive or obviously representative series of cases                                              |
|                            |                                                                                | 0                                | Potential for selection biases or not stated                                                         |
|                            | Q3. Selection of Controls                                                      | ☆                                | Community controls                                                                                   |
|                            |                                                                                | 0.5☆                             | Hospital controls                                                                                    |
|                            |                                                                                | 0                                | No description                                                                                       |
| Q4. Definition of Controls | ☆                                                                              | No history of disease (endpoint) |                                                                                                      |
|                            | 0                                                                              | No description of source         |                                                                                                      |
| <b>Comparability</b>       | Q5. Comparability of cases and controls on the basis of the design or analysis | ☆                                | Study controls for _____ (Select the most important factor.) *                                       |
|                            |                                                                                | ☆                                | Study controls for any additional factor *                                                           |
|                            |                                                                                | 0                                | No description                                                                                       |
| <b>Exposure</b>            | Q6. Ascertainment of exposure                                                  | ☆                                | a) secure record (eg surgical records)<br>b) structured interview where blind to case/control status |
|                            |                                                                                | 0.5☆                             | a) interview not blinded to case/control status<br>b) medical record only                            |
|                            |                                                                                | 0                                | Self-report or no description                                                                        |
|                            | Q7. Same method of ascertainment for cases and controls                        | ☆                                | Yes                                                                                                  |
|                            |                                                                                | 0                                | No                                                                                                   |
|                            | Q8. Non-Response rate                                                          | ☆                                | Same rate for both groups                                                                            |
|                            |                                                                                | 0                                | Non respondents described                                                                            |



---

Rate different and no designation

---

Appendix C Quality assessment according to the Newcastle-Ottawa Scale of cohort studies and case-control studies.

| Author, Year                    | Q1 | Q2 | Q3  | Q4  | Q5 | Q6  | Q7  | Q8  | SUM |
|---------------------------------|----|----|-----|-----|----|-----|-----|-----|-----|
| Mirjam I. Geerlings, 2002       | 1  | 1  | 1   | 0.5 | 2  | 1   | 1   | 0   | 7.5 |
| Majon Muller, 2008              | 0  | 1  | 1   | 1   | 2  | 1   | 1   | 0   | 7   |
| Ellika Andolf, 2020             | 1  | 1  | 1   | 0   | 2  | 0.5 | 0   | 0   | 5.5 |
| Chun-Ming Yang, 2015            | 1  | 1  | 1   | 1   | 2  | 0.5 | 0   | 0   | 6.5 |
| Vanessa Sánchez-Martínez, 2021  | 0  | 1  | 1   | 0   | 0  | 1   | 0.5 | 0   | 3.5 |
| M Nelander, 2017                | 1  | 1  | 1   | 1   | 1  | 0.5 | 1   | 0   | 6.5 |
| Yoko Shimizu, 2019              | 0  | 1  | 1   | 1   | 2  | 1   | 1   | 0.5 | 7.5 |
| Kristine Yaffe, 2010            | 0  | 1  | 1   | 0.5 | 2  | 1   | 1   | 0   | 6.5 |
| W.A. Rocca, 2007                | 1  | 1  | 1   | 1   | 1  | 1   | 1   | 0   | 7   |
| C.N. Lessov-Schlaggar, 2005     | 0  | 1  | 1   | 0   | 1  | 1   | 1   | 0   | 5   |
| Kohei Okamoto, 2015             | 0  | 1  | 1   | 0   | 0  | 1   | 0.5 | 0   | 3.5 |
| Martin J. Prince, 2018          | 1  | 1  | 0.5 | 0.5 | 1  | 1   | 0   | 0.5 | 5.5 |
| Elizabeth Barrette-Conner, 1999 | 0  | 1  | 1   | 0   | 2  | 1   | 0   | 0   | 5   |
| S. D. Chung, 2016               | 1  | 1  | 1   | 0.5 | 1  | 0.5 | 1   | 0   | 6   |
| Kevin T. Nead, 2016             | 1  | 1  | 1   | 0.5 | 0  | 0.5 | 1   | 0   | 5   |
| Jung Eun Yoo, 2020              | 1  | 1  | 1   | 0.5 | 2  | 0.5 | 1   | 0   | 7   |
| Hyesue Jang, 2018               | 1  | 1  | 1   | 1   | 0  | 0.5 | 1   | 0   | 5.5 |
| Natalie L. Rasgon, 2005         | 1  | 1  | 1   | 1   | 1  | 0   | 1   | 0   | 6   |
| Li-Ting Kao, 2017               | 1  | 1  | 1   | 0.5 | 2  | 0.5 | 1   | 0   | 7   |
| Kevin T. Nead, 2016             | 1  | 1  | 1   | 0.5 | 2  | 0.5 | 1   | 0   | 7   |
| Myungsun Shim, 2020             | 1  | 1  | 1   | 0.5 | 2  | 0.5 | 0   | 0   | 6   |
| David Robinson, 2019            | 1  | 1  | 1   | 0.5 | 1  | 0.5 | 1   | 0   | 6   |
| Joanne Ryan, 2009               | 0  | 1  | 1   | 0.5 | 1  | 1   | 0   | 0   | 4.5 |

|                             |     |   |     |     |   |     |   |     |     |
|-----------------------------|-----|---|-----|-----|---|-----|---|-----|-----|
| Ineke R. Postma, 2016       | 0   | 1 | 1   | 0   | 0 | 1   | 1 | 0   | 4   |
| Bulent Gunlusoy, 2016       | 0   | 1 | 1   | 1   | 0 | 1   | 1 | 0   | 5   |
| Sanna L. Read, 2017         | 0   | 1 | 1   | 0   | 2 | 1   | 1 | 0   | 6   |
| S.D. Moffat, 2004           | 0   | 1 | 1   | 0.5 | 2 | 1   | 1 | 0   | 6.5 |
| Emily W. Harville, 2019     | 0   | 1 | 0.5 | 0   | 2 | 1   | 0 | 0   | 4.5 |
| Majon Muller, 2010          | 0   | 1 | 1   | 0.5 | 2 | 1   | 0 | 0.5 | 6   |
| Farzin Khosrow-Khavar, 2016 | 1   | 1 | 1   | 0.5 | 2 | 0.5 | 1 | 0   | 7   |
| Gail A. Laughlin, 2010      | 0.5 | 1 | 1   | 0   | 1 | 1   | 1 | 0   | 5.5 |
| Juan Morote, 2017           | 0   | 1 | 1   | 0   | 0 | 1   | 0 | 0   | 3   |
| Xingyue Song, 2020          | 1   | 1 | 1   | 0.5 | 2 | 1   | 1 | 0   | 7.5 |
| Alain K. Koyama, 2016       | 0   | 1 | 1   | 0   | 2 | 1   | 1 | 0   | 6   |
| Leung-Wing Chu, 2010        | 0   | 1 | 1   | 0.5 | 2 | 1   | 0 | 0.5 | 6   |
| Molly Fox, 2018             | 1   | 1 | 1   | 1   | 1 | 1   | 1 | 0   | 7   |
| Supriya Gupta Mohile, 2010  | 0   | 1 | 1   | 0.5 | 0 | 1   | 0 | 0   | 3.5 |
| Ellika G Andolf, 2007       | 1   | 1 | 1   | 0.5 | 2 | 1   | 1 | 0   | 7.5 |
| Jenna Najjar, 2020          | 1   | 1 | 1   | 0.5 | 2 | 0.5 | 1 | 0   | 7   |
| Kristine Yaffe, 1998        | 0   | 1 | 1   | 0   | 0 | 1   | 0 | 0.5 | 3.5 |
| Wen-Kuan Huang, 2020        | 1   | 1 | 1   | 0.5 | 1 | 0.5 | 1 | 0   | 6   |
| Saima Basit, 2018           | 1   | 1 | 1   | 0.5 | 2 | 0.5 | 1 | 0   | 7   |
| Mette Norgaard, 2021        | 1   | 1 | 1   | 1   | 2 | 0.5 | 1 | 0   | 7.5 |
| Hung-Tse Chou, 2021         | 1   | 1 | 0.5 | 1   | 0 | 0.5 | 1 | 0   | 5   |
| J Ryan, 2014                | 1   | 1 | 0.5 | 0.5 | 2 | 1   | 1 | 0   | 7   |
| fu-Dong Li, 2020            | 1   | 1 | 0.5 | 1   | 0 | 0.5 | 1 | 0   | 5   |
| Laure Carcaillon, 2014      | 1   | 1 | 1   | 0.5 | 2 | 1   | 0 | 0.5 | 7   |
| Bum Sik Tae, 2018           | 1   | 1 | 1   | 1   | 0 | 0.5 | 1 | 0   | 5.5 |

|                               |     |   |     |     |   |     |   |     |     |
|-------------------------------|-----|---|-----|-----|---|-----|---|-----|-----|
| Bushra Imtiaz, 2014           | 1   | 1 | 1   | 1   | 1 | 1   | 1 | 0   | 7   |
| K. Yaffe, 2006                | 0   | 1 | 1   | 0   | 2 | 1   | 0 | 0.5 | 5.5 |
| Thien Kieu Thi Phung, 2010    | 1   | 1 | 1   | 0.5 | 0 | 0.5 | 1 | 0   | 5   |
| Julie A. Fields, 2017         | 0   | 1 | 0.5 | 0.5 | 0 | 0.5 | 1 | 0   | 3.5 |
| Keiko Kurita, 2016            | 0   | 1 | 1   | 0   | 2 | 1   | 1 | 0   | 6   |
| Sri Suravarapu, 2006          | 0   | 1 | 1   | 0.5 | 1 | 0.5 | 1 | 0   | 5   |
| Ravishankar Jayadevappa, 2018 | 1   | 1 | 1   | 0.5 | 2 | 0.5 | 1 | 0   | 7   |
| Paola Gilsanz, 2019           | 1   | 1 | 1   | 0.5 | 2 | 0.5 | 1 | 0   | 7   |
| Onder Cinar, 2021             | 0   | 1 | 1   | 1   | 0 | 1   | 0 | 0.5 | 4.5 |
| Joanne Ryan, 2012             | 0   | 1 | 1   | 0   | 1 | 1   | 1 | 0.5 | 5.5 |
| Seo Hyon Baik, 2017           | 1   | 1 | 1   | 0.5 | 0 | 0.5 | 1 | 0   | 5   |
| Mirjam I. Geerlings, 2001     | 0.5 | 1 | 0.5 | 0.5 | 2 | 0.5 | 1 | 0.5 | 6.5 |
| Jong Bin Bae, 2020            | 1   | 1 | 1   | 0   | 2 | 0.5 | 0 | 0   | 5.5 |
| Michelle M. Mielke, 2016      | 0   | 1 | 1   | 0   | 2 | 1   | 0 | 0   | 5   |
| L.-F. Low, 2005               | 1   | 1 | 1   | 1   | 0 | 1   | 1 | 0   | 6   |
| Michelle Heys, 2010           | 1   | 1 | 1   | 0   | 2 | 0   | 0 |     | 5   |
| Erin S. LeBlanc, 2010         | 0   | 1 | 1   | 1   | 2 | 1   | 0 | 0   | 6   |
| Yasin Ceylan, 2019            | 0   | 1 | 1   | 1   | 0 | 1   | 1 | 0   | 5   |
| Mirjam I. Geerlings, 2006     | 0.5 | 1 | 1   | 0.5 | 2 | 1   | 1 | 0   | 7   |
| Laure Carcaillon, 2013        | 0   | 1 | 1   | 0.5 | 2 | 1   | 0 | 0.5 | 6   |
| Shabbir M.H. Alibhai, 2016    | 0   | 1 | 1   | 1   | 1 | 1   | 1 | 0   | 6   |
| Jihun Kang, 2020              | 1   | 1 | 1   | 0.5 | 2 | 0.5 | 1 | 0.5 | 7.5 |
| Saima Basit, 2019             | 1   | 1 | 1   | 0.5 | 1 | 0.5 | 1 | 0   | 6   |
| Riley Bove, 2014              | 0   | 1 | 1   | 0.5 | 1 | 0.5 | 1 | 0.5 | 5.5 |
| A. Paganini-Hill, 2020        | 0   | 1 | 1   | 0.5 | 1 | 1   | 1 | 0   | 5.5 |

|                              |     |   |     |     |   |     |   |     |     |
|------------------------------|-----|---|-----|-----|---|-----|---|-----|-----|
| Sujarwoto Sujarwoto, 2019    | 1   | 1 | 1   | 1   | 0 | 1   | 1 | 0   | 6   |
| Robert N. McLay, 2003        | 0.5 | 1 | 1   | 0   | 2 | 1   | 0 | 0   | 5.5 |
| Carolien N.H. Abheiden, 2015 | 0   | 1 | 0.5 | 0   | 2 | 1   | 0 | 0   | 4.5 |
| Jong Won Kim, 2021           | 1   | 1 | 1   | 1   | 1 | 0   | 1 | 0   | 6   |
| Andrew H, 2018               | 1   | 1 | 1   | 0.5 | 0 | 0.5 | 0 | 0   | 4   |
| Chiara Zucchella, 2012       | 0   | 1 | 1   | 0.5 | 2 | 0.5 | 1 | 0   | 6   |
| Giovanni Ravaglia, 2007      | 1   | 1 | 0   | 1   | 1 | 1   | 1 | 0   | 6   |
| Fu-Dong Li, 2015             | 0   | 1 | 1   | 0.5 | 2 | 1   | 0 | 0.5 | 6   |
| Jessica Gong, 2022           | 1   | 1 | 1   | 1   | 0 | 1   | 1 | 0.5 | 6.5 |
| Mirjam I. Geerlings, 2002    | 1   | 1 | 1   | 0.5 | 2 | 1   | 1 | 0   | 7.5 |
| Changyong Yu, 2022           | 1   | 1 | 1   | 1   | 0 | 0   | 1 | 0   | 5   |
| Margot J Overman, 2022       | 0   | 1 | 1   | 0   | 2 | 1   | 1 | 0.5 | 6.5 |
| Alison Gemmill, 2022         | 1   | 1 | 0.5 | 0.5 | 0 | 1   | 1 | 0   | 5   |
| N. Araújo, 2022              | 0   | 1 | 1   | 0   | 1 | 1   | 1 | 0   | 5   |
| Joseph L. Saenz, 2021        | 0   | 1 | 0.5 | 0   | 2 | 1   | 1 | 0   | 5.5 |
| Jui-Ming Liu, 2021           | 1   | 1 | 1   | 0.5 | 0 | 0.5 | 1 | 1   | 6   |
| Onder Cinar, 2021            | 0   | 1 | 1   | 0   | 0 | 1   | 0 | 0   | 3   |
| Lina Bergman, 2021           | 0   | 1 | 1   | 1   | 0 | 1   | 0 | 1   | 5   |
| Hector Alonso-Quiñones, 2021 | 0   | 1 | 1   | 1   | 2 | 1   | 1 | 1   | 8   |
| Karl H. Tully, 2019          | 0   | 1 | 1   | 0.5 | 0 | 0.5 | 1 | 1   | 5   |
| Peter E. Lonergan, 2022      | 0   | 1 | 1   | 0.5 | 0 | 0.5 | 1 | 0   | 4   |
| C. S. Uldbjerg, 2022         | 0   | 1 | 1   | 0.5 | 0 | 0.5 | 1 | 0   | 4   |

Appendix D Grading approaches used to assess the credibility of meta-analysis.

**1. Risk of bias:**

First, we calculated the weighted quality score (WQS)=QS (study 1) × weight% (study 1) + QS (study 2) × weight% (study 2) + .....QS (study n) × weight% (study n)

**Note:** “QS” means NOS score (total score= 9); “Weight” means weight value in the random model

| WQS       | Risk of bias           |
|-----------|------------------------|
| [7.5-9]   | 0 (probably low)       |
| [6.5-7.5) | -1 (probably moderate) |
| <6.5      | -2 (probably high)     |

**2. Inconsistency**

Estimate the heterogeneity by calculating the I<sup>2</sup>, p value, and τ<sup>2</sup>.

| I <sup>2</sup> | Heterogeneity level   |
|----------------|-----------------------|
| <40%           | 0 (probably low)      |
| 40-60%         | -1(probably moderate) |
| 60-100%        | -2 (probably high)    |

**3. Imprecision**

Calculate the RR & 95% confidence interval (CI) and 95% prediction interval (PI):

- The CI in a random-effects model contains highly probable values for the summary (mean)effect but gives no information on the range of true effects that are likely to be seen in other settings which convey what range of intervention effects are likely to be seen in other individuals.
- A 95%PI estimates where the true effects are to be expected for 95% of similar (exchangeable) studies that might be conducted in the future. In the absence of between-study heterogeneity, the prediction interval coincides with the respective CI. However, in case of heterogeneity, a prediction interval covers a wider range than a CI.

| 95%CI                                            | 95%PI                                            | Rating |
|--------------------------------------------------|--------------------------------------------------|--------|
| Not containing RR=1                              | Not containing RR=1                              | 0      |
| Containing RR=1 & not containing RR=0.75 or 1.25 | Containing RR=1 & not containing RR=0.75 or 1.25 | 0      |
| Not containing RR=1                              | Containing RR=1                                  | -1     |
| Containing RR=1 & not containing RR=0.75 or 1.25 | Containing RR=1 & RR=0.75 or 1.25                | -1     |

Note: RR=0.75 or 1.25 is representative of the rough cutoff of evident benefits or harm.

Further, this item is downgraded when the sample size is too small.

| 95%CI                                                | Rating |
|------------------------------------------------------|--------|
| Not containing RR=1 & not containing RR=0.75 or 1.25 | 0      |
| Containing RR=1 & not containing RR=0.75 or 1.25     | 0      |
| Not containing RR=1 & containing RR=0.75 or 1.25     | -1     |
| Containing RR=1 & 0.75 or 1.25                       | -2     |

#### 4. Publication bias

| Number of studies included | P value         | Rating |
|----------------------------|-----------------|--------|
| >=10                       | Non-significant | 0      |
| <10                        | Non-significant | -1     |
| >=10 or <10                | Significant     | -2     |

#### 5. Indirectness

| Outcome                       | Rating |
|-------------------------------|--------|
| Dementia or AD                | 0      |
| Dementia or cognitive decline | -1     |
| Cognition                     | -2     |

Appendix E Characteristics of included studies.

| Author, year              | Study design | Population source | Mean age (years) | Observation (years) | Sex                      | Incident cases        | Outcome           | Description of risk factor                                                                                                                                                                                                                                                      | Adjustment factor                                                                                                                                                                                                                                         |
|---------------------------|--------------|-------------------|------------------|---------------------|--------------------------|-----------------------|-------------------|---------------------------------------------------------------------------------------------------------------------------------------------------------------------------------------------------------------------------------------------------------------------------------|-----------------------------------------------------------------------------------------------------------------------------------------------------------------------------------------------------------------------------------------------------------|
| Mirjam I. Geerlings, 2002 | cohort       | community         | >55              | 6.3 (0–9)           | female (53%), male (47%) | 185                   | dementia AD       | estradiol                                                                                                                                                                                                                                                                       | women: adjusted for age, education, body mass index, smoking status, type of menopause, age at natural menopause, and ever use of hormonal replacement therapy.<br>men: adjusted for age, education, body mass index, smoking status, and alcohol intake. |
| Majon Muller, 2008        | cohort       | community         | 77.4             | 4                   | male                     | 44                    | cognitive decline | testosterone<br>estradiol<br>estrone                                                                                                                                                                                                                                            | adjusted for age, BMI, cholesterol, intima media thickness, diabetes, hypertension, smoking, APOE-genotype, and socioeconomic status.                                                                                                                     |
| Ellika Andolf, 2020       | cohort       | community         | >25              | >20                 | female                   | ACD:6,881<br>AD:2,161 | ACD               | abruptio placenta<br>placental anomaly<br>recurrent miscarriages<br>fetal growth restriction (NPR)<br>excessive growth<br>pregnancy induced hypertension<br>preeclampsia<br>preterm labor and birth<br>PPROM<br>gestational diabetes<br>intrauterine fetal death<br>infertility | adjusted for maternal education, parity, childlessness, origin, child composition, and the composite variable any cardiovascular disease (presence of either heart failure, heart disease, atherosclerosis, stroke, SLE, diabetes or hypertension).       |
| Chun-Ming                 | cohort       | community         | NA               | 7                   | male                     | AD:328                | AD                | erectile dysfunction                                                                                                                                                                                                                                                            | adjusted for age, diabetes mellitus, hypertension,                                                                                                                                                                                                        |



|                                |        |           |      |     |        |           |                               |                                                                                                                                                                                                                                      |              |    |                                                                                                                                                                                                                                                                                                                                                                      |
|--------------------------------|--------|-----------|------|-----|--------|-----------|-------------------------------|--------------------------------------------------------------------------------------------------------------------------------------------------------------------------------------------------------------------------------------|--------------|----|----------------------------------------------------------------------------------------------------------------------------------------------------------------------------------------------------------------------------------------------------------------------------------------------------------------------------------------------------------------------|
| Yang, 2015                     |        |           |      |     |        | Non-AD:94 |                               |                                                                                                                                                                                                                                      |              |    | coronary heart disease, chronic kidney disease, hyperlipidemia, stroke, depression, anxiety, thyroid disorder, geographic area, and income.                                                                                                                                                                                                                          |
| Vanessa Sánchez-Martínez, 2021 | cohort | hospital  | 70.8 | 1   | male   | NA        | cognitive decline             | ADT                                                                                                                                                                                                                                  |              |    | NA                                                                                                                                                                                                                                                                                                                                                                   |
| M Nelander, 2017               | cohort | community | 71   | 8   | female | 197       | dementia                      | hypertensive pregnancy                                                                                                                                                                                                               | complication | in | adjusted for education, smoking and BMI.                                                                                                                                                                                                                                                                                                                             |
| Yoko Shimizu, 2019             | cohort | community | 72.9 | 10  | female | 227       | cognitive decline             | age at menarche (years)<br>menstrual regularity<br>menstrual cycle length (days)<br>age at menopause (years)<br>surgical menopause<br>reproductive period (years)<br>age at first birth (years)<br>number of births<br>breastfeeding |              |    | adjusted for age at examination (continuous), BMI (< 21.8, 21.8–24.1, ≥24.1 kg/m <sup>2</sup> ), educational background (junior high school, high school or higher), smoking (never, ever), leisure-time physical exercise (less than one day/week, one day/week or more), and past medical history (none or any of hypertension, diabetes mellitus, or depression). |
| Kristine Yaffe, 2010           | cohort | community | >70  | 6   | female | 37        | cognitive decline             | testosterone<br>estradiol                                                                                                                                                                                                            |              |    | adjusted for age, education, body-mass index, current oestrogen use, surgical menopause, and baseline modified MMSE score.                                                                                                                                                                                                                                           |
| W.A. Rocca, 2007               | cohort | community | >40  | >25 | female | 248       | cognitive decline<br>dementia | unilateral oophorectomy<br>concurrent hysterectomy<br>without hysterectomy<br>bilateral oophorectomy                                                                                                                                 | with         |    | adjusted for education (< 9; 9–12; 13–16; > 16 years), history of depression (ever vs never), and type of interview (direct vs proxy).                                                                                                                                                                                                                               |

|                                 |        |           |            |                  |        |                                     |                   |                                                                                                                                                                 |                                                                                                                                                                                                                                                      |
|---------------------------------|--------|-----------|------------|------------------|--------|-------------------------------------|-------------------|-----------------------------------------------------------------------------------------------------------------------------------------------------------------|------------------------------------------------------------------------------------------------------------------------------------------------------------------------------------------------------------------------------------------------------|
| C.N. Lessov-Schlaggar, 2005     | cohort | community | 63.1       | 10-16            | male   | NA                                  | cognitive decline | testosterone<br>estradiol<br>estrone<br>SHBG                                                                                                                    | adjusted for age, education, and depressive symptomatology.                                                                                                                                                                                          |
| Kohei Okamoto, 2015             | cohort | hospital  | 67.5       | 1                | male   | NA                                  | cognitive decline | LH-RH agonist                                                                                                                                                   | NA                                                                                                                                                                                                                                                   |
| Martin J. Prince, 2018          | cohort | community | 72.0       | 3                | female | 692                                 | dementia          | age at menarche (per year)<br>age at menopause (per year)<br>reproductive period (per year)<br>parity (per child)<br>nulliparity<br>age at birth of first child | adjusted for age, education, assets, and marital status.                                                                                                                                                                                             |
| Elizabeth Barrette-Conner, 1999 | cohort | community | 70.2       | 4                | male   | NA                                  | cognitive decline | total T<br>bio-T<br>total-E2<br>bio-E2                                                                                                                          | adjusted for age, education, alcohol use, BMI, and smoking.                                                                                                                                                                                          |
| S. D. Chung, 2016               | cohort | community | 72.2       | 5                | male   | NA                                  | AD                | ADT                                                                                                                                                             | adjusted for patients' age, geographical location, monthly income, and urbanization level.                                                                                                                                                           |
| Kevin T. Nead, 2016             | cohort | hospital  | 70.9: 66.7 | 2.7<br>(1.0–5.4) | male   | NA                                  | AD                | ADT                                                                                                                                                             | NA                                                                                                                                                                                                                                                   |
| Jung Eun Yoo, 2020              | cohort | community | 61.2       | 5.74             | female | ACD:<br>212,227,<br>AD:<br>162,901, | ACD               | age at menarche (years)<br>age at menopause (years)<br>duration of fertility (years)<br>parity<br>nulliparity                                                   | adjusted for age at menarche, age at menopause, parity, duration of breast feeding, duration of HRT, duration of OC use, alcohol consumption, smoking, regular exercise, income, body mass index, hypertension, diabetes mellitus, dyslipidemia, and |

|                         |              |           |            |                  |        |                      |                          |                                                                                                                                                                |                                                                                                                                                                                                                                                          |
|-------------------------|--------------|-----------|------------|------------------|--------|----------------------|--------------------------|----------------------------------------------------------------------------------------------------------------------------------------------------------------|----------------------------------------------------------------------------------------------------------------------------------------------------------------------------------------------------------------------------------------------------------|
|                         |              |           |            |                  |        |                      |                          | duration of breast feeding (months)                                                                                                                            | cancer; adjusted for duration of fertility, parity, duration of breast feeding, duration of HRT, duration of OC use, alcohol consumption, smoking, regular exercise, income, body mass index, hypertension, diabetes mellitus, dyslipidemia, and cancer. |
| Hyesue Jang, 2018       | case-control | community | >70        | NA               | female | MCI: 896<br>AD: 118  | cognitive decline;<br>AD | No. of completed pregnancy with childbirth<br>No. of incomplete pregnancy without childbirth<br>age at menopause<br>length of reproductive period<br>breastfed | adjusted for age; total years of education; socioeconomic status; employment; history of diabetes mellitus, hypertension, and hyperlipidemia; Geriatric Depression Scale Short Form score; age at menopause; and length of reproductive period.          |
| Natalie L. Rasgon, 2005 | case-control | community | 74.7:71.9  | NA               | female | NA                   | cognitive decline        | age at menarche, years<br>age at menopause, years<br>reproductive period, years<br>parity                                                                      | adjusted for age and education.                                                                                                                                                                                                                          |
| Li-Ting Kao, 2017       | cohort       | community | 74.2:69.3  | 5                | male   | incidence rate 2.12% | dementia                 | ADT                                                                                                                                                            | adjusted for geographical location, monthly income, urbanization level, and age.                                                                                                                                                                         |
| Kevin T. Nead, 2016     | cohort       | hospital  | 66.9       | 3.4<br>(1.0-7.2) | male   | 314                  | dementia                 | ADT                                                                                                                                                            | adjusted for age; race/ethnicity; smoking status; anticoagulant, antiplatelet, antihypertensive, and statin therapy; and history of cardiovascular disease, type 1 or 2 diabetes, stroke, or malignant neoplasm.                                         |
| Myungsun Shim, 2020     | cohort       | community | 72.8: 66.8 | 4                | male   | 354                  | dementia                 | GnRHa                                                                                                                                                          | adjusted for age at diagnosis, residence (urban vs. suburban/rural), socioeconomic status (National health insurance vs. Medicaid), prior medication, prior antiandrogen use, past medical history, and                                                  |

|                       |        |           |             |                  |        |        |                   |                                                                                                                                                         |                                                                                                                                                                                                           |
|-----------------------|--------|-----------|-------------|------------------|--------|--------|-------------------|---------------------------------------------------------------------------------------------------------------------------------------------------------|-----------------------------------------------------------------------------------------------------------------------------------------------------------------------------------------------------------|
|                       |        |           |             |                  |        |        |                   |                                                                                                                                                         | comorbidity index for the nationwide cohort. For hospital validation cohort, alcohol consumption, smoking status, body mass index, and prostate specific antigen were added for adjustment.               |
| David Robinson, 2019  | cohort | hospital  | 76          | 4.3<br>(2.8–6.3) | male   | 9072   | ACD               | no prostate cancer<br>watchful waiting.<br>antiandrogen<br>GnRH agonists<br>orchidectomy                                                                | adjusted for CCI, educational level and civil status.                                                                                                                                                     |
| Joanne Ryan, 2009     | cohort | community | 72.8        | 4                | female | NA     | cognitive decline | age at first menses<br>age at menopause<br>reproductive years<br>surgical menopause<br>nulliparous<br>number of children<br>age at birth of first child | adjusted for age, educational level and baseline cognitive test score.                                                                                                                                    |
| Ineke R. Postma, 2016 | cohort | hospital  | 39: 40      | 6                | female | NA     | cognitive decline | (pre)eclampsia                                                                                                                                          | NA                                                                                                                                                                                                        |
| Bulent Gunlusoy, 2016 | cohort | hospital  | 67.12:66.84 | 1                | male   | NA     | cognitive decline | ADT                                                                                                                                                     | NA                                                                                                                                                                                                        |
| Sanna L. Read, 2017   | cohort | community | 65.2        | 8                | female | NA     | cognitive decline | number of children                                                                                                                                      | adjusted for age, education, occupational status, tenure status, wealth, limiting long-term illness, physical activity, smoking, depressive symptoms, control, partner, face-to-face contact, activities. |
| S.D. Moffat,          | cohort | community | 66.3        | 19.1(4-37)       | male   | AD:54, | AD                | testosterone and SHBG                                                                                                                                   | adjusted for age, years of education, ever smoke,                                                                                                                                                         |

|                             |        |           |      |           |                              |     |                      |                   |                                                                                                                                                                                                                                   |                                                                                                                                                                                                                                                                                 |
|-----------------------------|--------|-----------|------|-----------|------------------------------|-----|----------------------|-------------------|-----------------------------------------------------------------------------------------------------------------------------------------------------------------------------------------------------------------------------------|---------------------------------------------------------------------------------------------------------------------------------------------------------------------------------------------------------------------------------------------------------------------------------|
| 2004                        |        |           |      |           |                              |     | dementia:68          | dementia          |                                                                                                                                                                                                                                   | body mass index diabetes, any cancer diagnoses, hormone supplement.                                                                                                                                                                                                             |
| Emily W. Harville, 2019     | cohort | community | 47.7 | NA        | female                       | NA  |                      | cognitive decline | nulliparous<br>any fertility difficulties<br>birth <16 years<br>birth<18 years<br>low birthweight<br>preterm birth<br>gestational diabetes<br>hypertensive disorders<br>miscarriage<br>ever breastfed<br>total lifetime breastfed | adjusted for age, menopausal status, race, smoking, education, vocabulary, BMI, last known marital status, depressive symptoms.                                                                                                                                                 |
| Majon Muller, 2010          | cohort | community | 77.4 | 5.2 (3.1) | female (70.3%); male (29.7%) |     | dementia: 146. AD:91 | dementia AD       | SHBG                                                                                                                                                                                                                              | adjusted for age (timescale), ethnic group, education, APOE genotype, smoking, BMI, cholesterol, insulin, hypertension, diabetes.                                                                                                                                               |
| Farzin Khosrow-Khavar, 2016 | cohort | hospital  | 70.7 | 4.3 (3.6) | male                         | 799 |                      | dementia AD       | ADT type<br>GnRH agonists<br>oral antiandrogens<br>GnRH agonists and oral antiandrogens<br>other types or combinations<br>duration of ADT use, months                                                                             | adjusted for alcohol-related disorders; smoking status; body mass index; modified Charlson comorbidity index; prostate-specific antigen; history of head injury; use of antidepressants, antipsychotics, benzodiazepines, and hypnotics; and year of prostate cancer diagnosis. |
| Gail A. Laughlin,           | cohort | community | 69   | 8.3       | female                       | NA  |                      | cognitive decline | oestrone                                                                                                                                                                                                                          | adjusted for age, education and mean CFT score.                                                                                                                                                                                                                                 |

|                             |              |           |       |          |        |      |                   |                                                                                                            |                                                                                                                                                                                                                                                                                                                                                                                                                                                                                               |
|-----------------------------|--------------|-----------|-------|----------|--------|------|-------------------|------------------------------------------------------------------------------------------------------------|-----------------------------------------------------------------------------------------------------------------------------------------------------------------------------------------------------------------------------------------------------------------------------------------------------------------------------------------------------------------------------------------------------------------------------------------------------------------------------------------------|
| 2010                        |              |           |       |          |        |      |                   |                                                                                                            |                                                                                                                                                                                                                                                                                                                                                                                                                                                                                               |
| Juan Morote,<br>2017        | cohort       | hospital  | 71.2  | 0.5      | male   | NA   | cognitive decline | LHRH                                                                                                       | NA                                                                                                                                                                                                                                                                                                                                                                                                                                                                                            |
| Xingyue Song,<br>2020       | cohort       | community | 53.4  | 16-23    | female | 1332 | cognitive decline | age at menarche<br>age at first livebirth<br>age at menopause<br>duration of reproductive period           | adjusted for age at MMSE measurement, year of baseline interview, dialect group, marital status, and education level, smoking status, tea intake, coffee intake, sleep duration, physical activity, body mass index, total energy intake, alternate Mediterranean dietary pattern score, baseline history of hypertension, diabetes, cardiovascular disease, cancer, age at menarche, number of children, use of oral contraceptives, age at menopause and use of hormone replacement therapy |
| Alain K.<br>Koyama,<br>2016 | cohort       | hospital  | 60.1  | 22.6±0.4 | female | NA   | cognitive decline | estrone<br>estrone sulfate<br>estradiol<br>androstenedione<br>testosterone<br>DHEA                         | adjusted for age, occupation, BMI, alcohol use, physical activity, age at menopause, depression status, antidepressant use.                                                                                                                                                                                                                                                                                                                                                                   |
| Leung-Wing<br>Chu, 2010     | cohort       | community | 72.7  | 1        | male   | 10   | AD                | serum testosterone level                                                                                   | adjusted for age, education, BMI, fasting plasma glucose, and serum HDL-C levels.                                                                                                                                                                                                                                                                                                                                                                                                             |
| Molly Fox,<br>2018          | case-control | community | 77:86 | NA       | female | NA   | AD                | age at menarche<br>age at menopause<br>age at natural menopause<br>reproductive span<br>age at first birth | adjusted for age at first birth, reproductive span, and history of breastfeeding, marriages, and occupation.                                                                                                                                                                                                                                                                                                                                                                                  |

|                                  |        |           |                                          |           |        |                              |  |                      |                                                                                                                                                                               |                                                                                                                                                                                                                                                                                                                                                                                    |
|----------------------------------|--------|-----------|------------------------------------------|-----------|--------|------------------------------|--|----------------------|-------------------------------------------------------------------------------------------------------------------------------------------------------------------------------|------------------------------------------------------------------------------------------------------------------------------------------------------------------------------------------------------------------------------------------------------------------------------------------------------------------------------------------------------------------------------------|
|                                  |        |           |                                          |           |        |                              |  |                      | parity, continuous<br>cumulative months pregnant<br>breastfeeding duration<br>hysterectomy<br>bilateral oophorectomy<br>parity<br>parous<br>miscarriages<br>medical abortions |                                                                                                                                                                                                                                                                                                                                                                                    |
| Supriya<br>Gupta<br>Mohile, 2010 | cohort | hospital  | 71                                       | 0.5       | male   | NA                           |  | cognitive<br>decline | at least 6 months of ADT                                                                                                                                                      | NA                                                                                                                                                                                                                                                                                                                                                                                 |
| Ellika G<br>Andolf, 2007         | cohort | community | 26.1                                     | 35        | female | 608                          |  | dementia.            | hypertension without proteinuria<br>hypertension and proteinuria<br>preeclampsia<br>preeclampsia + eclampsia                                                                  | adjusted for mother's age at birth, mother's attained<br>educational level in 1985, marital status and origin<br>(Nordic/non-Nordic) any history of cardiovascular<br>disease later in life (diabetes, atherosclerosis, stroke,<br>ischemic heart disease, heart failure and<br>hypertension).                                                                                     |
| Jenna Najar,<br>2020             | cohort | community | Q1:50.1<br>Q2:53.0<br>Q3:52.7<br>Q4:62.3 | 26.8±10.2 | female | dementia:<br>291.<br>AD: 146 |  | dementia<br>AD       | reproductive period (years)<br>breastfeeding (months)<br>pregnancies (number)<br>age at menarche<br>age at menopause                                                          | adjusted for reproductive period, number of<br>pregnancies, months of breastfeeding, birth year,<br>exogenous estrogen, physical activity, WHR,<br>hypertension, ischemic heart disease, and<br>psychological stress.<br>adjusted for age at menarche, age at menopause,<br>number of pregnancies, months of breastfeeding,<br>birth year, psychological stress, and hypertension. |

|                      |              |           |                               |                                               |        |                               |                               |                                                                                                                                                                               |                                                                                                                                                                                                                                                                                                                  |
|----------------------|--------------|-----------|-------------------------------|-----------------------------------------------|--------|-------------------------------|-------------------------------|-------------------------------------------------------------------------------------------------------------------------------------------------------------------------------|------------------------------------------------------------------------------------------------------------------------------------------------------------------------------------------------------------------------------------------------------------------------------------------------------------------|
| Kristine Yaffe, 1998 | cohort       | community | 71.9                          | 5                                             | female | NA                            | cognitive decline             | estrone<br>estradiol                                                                                                                                                          | adjusted for age.                                                                                                                                                                                                                                                                                                |
| Wen-Kuan Huang, 2020 | cohort       | community | 73                            | 3.46<br>(1.92-5.51)                           | male   | 1525                          | dementia<br>AD                | no ADT<br>GnRH agonist<br>orchiectomy<br>antiandrogen monotherapy                                                                                                             | adjusted for urbanization, monthly income, enrollee category, comorbidities, benzodiaepine, and anti-cholinergic use, and number of clinical visits.                                                                                                                                                             |
| Saima Basit, 2018    | cohort       | community | <45                           | 21.1<br>(11.3-23.4)                           | female | dementia:<br>1728,<br>AD:676. | dementia<br>AD                | pre-eclampsia                                                                                                                                                                 | adjusted for maternal birth year, parity, region of most recent delivery, cardiovascular disease, stroke, chronic kidney disease, hypertension, and diabetes.                                                                                                                                                    |
| Mette Norgaard, 2021 | cohort       | community | 67.5                          | 6.9<br>(3.6-11.6)<br>and<br>6.4<br>(3.4-10.8) | male   | ACD: 28652<br>AD:13549        | dementia<br>AD                | BPH                                                                                                                                                                           | adjusted for cardiovascular disease, diabetes mellitus, hyperlipidemia, hypertension, obesity, chronic obstructive pulmonary disease, use of antihypertensive drugs, use of NSAIDs, income in the year before index date, and employment status in the year before index date, and renal failure (time-varying). |
| Hung-Tse Chou, 2021  | case-control | community | 63.7                          | NA                                            | female | 75                            | cognitive decline             | age of menarche (year)<br>reproductive period (years)<br>irregular menstrual cycle<br>birth history<br>birth times<br>breast feeding history<br>breastfeeding period (months) | adjusted for age, cerebrovascular disease, education level, living alone, BMI, total cholesterol, LDL-C, menarche age, reproductive period, breath times and breastfeeding period.                                                                                                                               |
| J Ryan, 2014         | cohort       | community | Age at menopause:<br>>50 73.9 | 7                                             | female | 3739                          | cognitive decline<br>dementia | age at menopause (years)<br>surgical menopause                                                                                                                                | adjusted for baseline cognitive function, recruitment center, age, education level, physical limitations, chronic illness, depression, use of HT at the                                                                                                                                                          |



|                        |              |           |                             |                                      |                                |                           |                   |                                                                          |  |  |                                                                                                                                                                                                                                                                                                                        |
|------------------------|--------------|-----------|-----------------------------|--------------------------------------|--------------------------------|---------------------------|-------------------|--------------------------------------------------------------------------|--|--|------------------------------------------------------------------------------------------------------------------------------------------------------------------------------------------------------------------------------------------------------------------------------------------------------------------------|
|                        |              |           |                             | 46–50 74.2<br>41–45 74.6<br>≤40 74.1 |                                |                           |                   |                                                                          |  |  | menopause and current HT use, also adjusted for APOE-e4.                                                                                                                                                                                                                                                               |
| fu-Dong Li, 2020       | case-control | community | 69.2                        | NA                                   | female                         | 1053                      | cognitive decline | mean breastfeeding duration                                              |  |  | adjusted for age, race, education level, marital status, family income, body mass index, physical activity, hypertension, Activities of Daily Living Scale scores, and patient health questionnaire-9 scores, plus reproductive period, age at first birth, parity, incomplete pregnancy, and oral contraceptives use. |
| Laure Carcaillon, 2014 | cohort       | community | Noncases: 74.4<br>ACD: 78.7 | 4                                    | female                         | dementia : 132.<br>AD:90. | dementia AD       | testosterone<br>estradiol                                                |  |  | adjusted for age, center, education, APOE e4, depressive symptoms, waist-to-hip ratio, Mini-Mental State Examination score at baseline, hypercholesterolemia, and history of myocardial infarction and stroke.                                                                                                         |
| Bum Sik Tae, 2018      | cohort       | hospital  | 71.2:65.9                   | 4.09±2.33                            | male                           | 4,743                     | cognitive decline | no ADT<br>ADT < 12 mo<br>ADT ≥ 12 mo                                     |  |  | NA                                                                                                                                                                                                                                                                                                                     |
| Bushra Imtiaz, 2014    | case-control | community | 81                          | NA                                   | female                         | NA                        | AD                | oophorectomy<br>hysterectomy<br>hysterectomy with bilateral oophorectomy |  |  | adjusted for use and duration of HT and modified Charlson comorbidity index.                                                                                                                                                                                                                                           |
| K. Yaffe, 2006         | cohort       | community | 75.2                        | 2                                    | female (45.2%)<br>male (54.8%) | NA                        | cognitive decline | testosterone<br>estradiol                                                |  |  | adjusted for age, race, education, study site, baseline cognitive function, hypertension, and weight,                                                                                                                                                                                                                  |
| Thien Kieu             | cohort       | community | >40                         | 29                                   | female                         | 95,239                    | dementia          | hysterectomy                                                             |  |  | adjusted for hysterectomy, unilateral oophorectomy,                                                                                                                                                                                                                                                                    |

|                               |        |           |           |                                             |        |                                  |                                        |                                                                      |                                                                                                                                            |
|-------------------------------|--------|-----------|-----------|---------------------------------------------|--------|----------------------------------|----------------------------------------|----------------------------------------------------------------------|--------------------------------------------------------------------------------------------------------------------------------------------|
| Thi Phung, 2010               |        |           |           |                                             |        |                                  |                                        | unilateral oophorectomy<br>bilateral oophorectomy<br>no hysterectomy | bilateral oophorectomy, and indication for operation.                                                                                      |
| Julie A. Fields, 2017         | cohort | hospital  | 59.2:59.6 | 34.9<br>(32.0-47.2);<br>34.5<br>(32.0-46.4) | female | 13                               | dementia<br>or<br>cognitive<br>decline | pre-eclampsia                                                        | NA                                                                                                                                         |
| Keiko Kurita, 2016            | cohort | community | 60.7      | 2.7                                         | female | NA                               | cognitive<br>decline                   | oophorectomy                                                         | adjusted for trial, age, education, race/ethnicity, body mass index, treatment indicator, and the baseline cognitive domain score.         |
| Sri Suravarapu, 2006          | cohort | community | 72.7      | 10.25<br>(9.07-<br>10.68)                   | male   | 21                               | dementia                               | testosterone                                                         | adjusted for age and BMI.                                                                                                                  |
| Ravishankar Jayadevappa, 2018 | cohort | hospital  | 76.0:74.3 | 8.3 (4.7)                                   | male   | ADT:16755;<br>dementia:<br>27974 | dementia;<br>AD                        | 1-4 ADT doses<br>5-8 ADT doses<br>>8 ADT doses<br>No ADT             | adjusted for age at diagnosis, race/ethnicity, geographic area, marital status, comorbidity score, cancer stage, and socioeconomic status. |
| Paola Gilsanz, 2019           | cohort | community | 51.1      | 9.1 (6.3)<br>(0.003-<br>21.7)               | female | 2,577                            | dementia                               | menarche, y<br>menopause, y<br>reproductive span, y<br>hysterectomy  | adjusted for dementia associated with age at menarche, age at menopause, duration of reproductive span, and hysterectomies.                |
| Onder Cinar, 2021             | cohort | hospital  | 69.08     | 0.5                                         | male   | NA                               | cognitive<br>decline                   | ADT                                                                  | NA                                                                                                                                         |
| Joanne Ryan, 2012             | cohort | community | 60        | 2                                           | female | NA                               | cognitive<br>decline                   | estrone<br>testosterone<br>estradiol                                 | adjusted for age, education, depressive symptoms, age at menopause and baseline cognitive score.                                           |

|                           |              |           |                                                                                                  |                  |        |                                    |                   |                                                                                                                                      |                                                                                                                                                                                                |
|---------------------------|--------------|-----------|--------------------------------------------------------------------------------------------------|------------------|--------|------------------------------------|-------------------|--------------------------------------------------------------------------------------------------------------------------------------|------------------------------------------------------------------------------------------------------------------------------------------------------------------------------------------------|
| Seo Hyon Baik, 2017       | cohort       | hospital  | 75.21                                                                                            | 5.5              | male   | AD:109,815<br>dementia:<br>223,765 | AD<br>dementia    | ADT                                                                                                                                  | adjusted for other cancer therapies and other covariates.                                                                                                                                      |
| Mirjam I. Geerlings, 2001 | cohort       | community | Reproductive Period, y<br><34 71.7<br>34-36 70.3<br>37-39 70.0<br>>39 68.7<br>Artificial<br>68.3 | 6.3<br>(0.0-9.4) | female | dementia:<br>199<br>AD:159         | dementia<br>AD    | reproductive period, y<br>artificial menopause<br>per y increase in reproductive period<br>age at menarche, y<br>age at menopause, y | adjusted for age, education, smoking status, alcohol intake, body mass index, hormone replacement therapy, number of children, and apolipoprotein E genotype.                                  |
| Jong Bin Bae, 2020        | cohort       | community | 73.1                                                                                             | NA               | female | NA                                 | dementia          | 0 (nulliparity)<br>≥ 5 (grand multiparity)<br>5 to 9<br>≥ 10                                                                         | adjusted for age, educational level, hypertension, diabetes mellitus, and cohort as covariates.                                                                                                |
| Michelle M. Mielke, 2016  | cohort       | community | >57                                                                                              | NA               | female | NA                                 | cognitive decline | normotensive pregnancy<br>hypertensive pregnancy                                                                                     | adjusted for age, race, education, body mass index, smoking, hypertension, family history of hypertension, with hypertension duration, which was assessed for women with current hypertension. |
| L.-F. Low, 2005           | case-control | community | 62.5                                                                                             | NA               | female | NA                                 | cognitive decline | reproductive period                                                                                                                  | adjusted for age, education and verbal intelligence, health and mood variables, lifestyle variables, and other variables that impact on lifetime estrogen exposure.                            |
| Michelle Heys, 2010       | cohort       | community | 60.4                                                                                             | NA               | female | NA                                 | cognitive decline | reproductive period (years)<br>age of first pregnancy (years)<br>parity                                                              | adjusted for age (continuous), education, parental possessions, occupation, and physical activity.                                                                                             |

|                            |        |           |             |                  |        |                                  |                   |                                   |                                              |                                                                                                                                                                                                                                                                 |
|----------------------------|--------|-----------|-------------|------------------|--------|----------------------------------|-------------------|-----------------------------------|----------------------------------------------|-----------------------------------------------------------------------------------------------------------------------------------------------------------------------------------------------------------------------------------------------------------------|
|                            |        |           |             |                  |        |                                  |                   |                                   | duration of breast feeding per child (years) |                                                                                                                                                                                                                                                                 |
| Erin S. LeBlanc, 2010      | cohort | community | 73          | 4.5              | male   | NA                               | cognitive decline | testosterone<br>estradiol<br>SHBG |                                              | adjusted for age group, education level (complete high school or less vs. complete college or more), race, self-rated health, and alcohol consumption.                                                                                                          |
| Yasin Ceylan, 2019         | cohort | hospital  | 67.27:66.65 | 1                | male   | NA                               | cognitive decline | ADT                               |                                              | NA                                                                                                                                                                                                                                                              |
| Mirjam I. Geerlings, 2006  | cohort | community | 77.4        | 6.1 (4.4–7.8)    | male   | dementia:<br>233<br>AD:134       | dementia<br>AD    | testosterone<br>estradiol         |                                              | adjusted for age (timescale), years of education, Cognitive Abilities Screening Instrument (CASI) score at baseline, smoking habits, alcohol intake, body mass index, physical activity, metabolic syndrome, diabetes, and depression.                          |
| Laure Carcaillon, 2013     | cohort | community | 74.5        | 3.1±1.0          | male   | dementia:<br>105<br>AD:62        | dementia<br>AD    | testosterone<br>estradiol         |                                              | adjusted for age, center, educational level, body mass index, apolipoprotein E ε4 level, Mini-Mental State Examination score at baseline, diabetes mellitus, hypertension, hypercholesterolemia, tobacco status, history of coronary heart disease, and stroke. |
| Shabbir M.H. Alibhai, 2016 | cohort | hospital  | 68.9        | 3                | male   | NA                               | cognitive decline | ADT                               |                                              | adjusted for age and education.                                                                                                                                                                                                                                 |
| Jihun Kang, 2020           | cohort | community | 68.5:67.8   | 5.2              | male   | dementia:<br>26,590<br>AD:19,763 | dementia<br>AD    | ADT                               |                                              | adjusted for age, income, Charlson comorbidity index, diabetes mellitus, hypertension, dyslipidemia, aspirin use, statin use, smoking status, BMI, blood glucose, systolic blood pressure, and total cholesterol.                                               |
| Saima Basit, 2019          | cohort | community | <42         | 21.6 (11.6–23.4) | female | dementia:<br>2188                | dementia<br>AD    | stillbirth<br>miscarriages        |                                              | adjusted for birth year (5-year intervals), parity (1, 2, !3), age, cardiovascular disease, hypertension, and                                                                                                                                                   |

|                              |              |           |           |      |        |     |                   |                                                                                                                                                                                                         |         |                                                                                                                                                                                                                                                  |
|------------------------------|--------------|-----------|-----------|------|--------|-----|-------------------|---------------------------------------------------------------------------------------------------------------------------------------------------------------------------------------------------------|---------|--------------------------------------------------------------------------------------------------------------------------------------------------------------------------------------------------------------------------------------------------|
|                              |              |           |           |      |        |     | AD:860            |                                                                                                                                                                                                         |         | diabetes. (dementia)<br>adjusted for birth year (5-year intervals), parity (1, 2, ≥3), and age (the underlying time scale in the Cox model) (AD and VaD)                                                                                         |
| Riley Bove, 2014             | cohort       | community | 78        | 18   | female | 592 | AD                | surgical menopause                                                                                                                                                                                      |         | adjusted for age at enrollment, education (years), smoking (pack-years), and study (ROS vs MAP).                                                                                                                                                 |
| A. Paganini-Hill, 2020       | cohort       | community | 93.2      | 3.4  | female | 209 | dementia          | age at menarche<br>number of children<br>age at first child<br>no child<br>surgical menopause<br>bilateral oophorectomy<br>bilateral oophorectomy<br>age at last menstrual period<br>reproductive years | without | adjusted for education.                                                                                                                                                                                                                          |
| Sujarwoto, 2019              | case-control | community | 68.14     | NA   | female | NA  | cognitive decline | premature menopause<br>early onset menarche<br>number of biological children<br>number of stillbirths<br>number of miscarriages                                                                         |         | adjusted to account for other confounding factors (i.e. age, marital status, education, household expenditure, number of cigarettes consumed per day, grams of tobacco consumed per day, obesity, mental depression, and living in urban areas). |
| Robert N. McLay, 2003        | cohort       | community | 63.4      | 12.8 | female | NA  | cognitive decline | menopause<br>childbirth                                                                                                                                                                                 |         | adjusted for age, race, education, MMSE score at wave 1, childbirth, and age at menopause.                                                                                                                                                       |
| Carolien N.H. Abheiden, 2015 | case-control | hospital  | 67.1:64.2 | NA   | female | NA  | AD                | hypertensive disorders of pregnancy<br>pregnancy-induced hypertension<br>preeclampsia                                                                                                                   |         | adjusted for age and BMI.                                                                                                                                                                                                                        |

|                         |              |           |                    |                                              |                                       |                           |                      |                                                                                                                                                          |                                                                                                                                                                                                                                         |
|-------------------------|--------------|-----------|--------------------|----------------------------------------------|---------------------------------------|---------------------------|----------------------|----------------------------------------------------------------------------------------------------------------------------------------------------------|-----------------------------------------------------------------------------------------------------------------------------------------------------------------------------------------------------------------------------------------|
| eclampsia               |              |           |                    |                                              |                                       |                           |                      |                                                                                                                                                          |                                                                                                                                                                                                                                         |
| Jong Won Kim, 2021      | cohort       | community | 72.72:64.11        | ADT<br>(3.24±2.07)<br>Non-ADT<br>(3.50±2.28) | male                                  | NA                        | dementia<br>AD       | ADT use<br>duration of ADT (y)                                                                                                                           | adjusted for age.                                                                                                                                                                                                                       |
| Andrew H, 2018          | cohort       | community | >75                | 10.5<br>(9.4-12.2)                           | male                                  | 499                       | dementia             | testosterone<br>estradiol<br>dihydrotestosterone<br>LH<br>SHBG                                                                                           | adjusted for age, baseline cognitive function, depression, body mass index, hypertension, cardiovascular disease, and total plasma homocysteine.                                                                                        |
| Chiara Zucchella, 2012  | case-control | hospital  | 77.6: 76.7         | NA                                           | female                                | NA                        | AD                   | age at puberty<br>number of pregnancies<br>abortion<br>contraceptive therapy<br>age at menopause<br>reproductive life span                               | NA                                                                                                                                                                                                                                      |
| Giovanni Ravaglia, 2007 | cohort       | community | women:74<br>men:73 | women:<br>3.9±0.7<br>men:<br>3.8±0.8         | Female<br>(53.5%);<br>male<br>(46.5%) | dementia:<br>110<br>AD:69 | dementia<br>AD       | LH                                                                                                                                                       | adjusted for age, age at menopause, education, apolipoprotein E 4 genotype, smoking status, and body mass index, stroke, cardiovascular disease, diabetes, hyperhomocysteinemia, serum folate, serum vitamin B12, and serum creatinine. |
| Fu-Dong Li, 2015        | case-control | community | 69.8               | NA                                           | female                                | 919                       | cognitive<br>decline | reproductive period<br>regularity of menstrual cycle<br>length of menstrual cycle<br>number of full-term pregnancies<br>number of incomplete pregnancies | adjusted for potential confounders (age, race, education, marital status, economic status, smoking, alcohol drinking, exercise, hypertension, and depressive symptom).                                                                  |

|                        |              |           |       |      |        |         |                   |                                                                                                                                                                                                                                                                                                   |                                                                                                                                                                                                                                                       |
|------------------------|--------------|-----------|-------|------|--------|---------|-------------------|---------------------------------------------------------------------------------------------------------------------------------------------------------------------------------------------------------------------------------------------------------------------------------------------------|-------------------------------------------------------------------------------------------------------------------------------------------------------------------------------------------------------------------------------------------------------|
| Jessica Gong, 2022     | cohort       | community | 56.3  | 11.8 | female | 273,240 | dementia          | age at menarche<br>ever been pregnant<br>number of live births<br>parous versus not<br>age at first live birth<br>number of miscarriages<br>number of stillbirths<br>number of abortions<br>reproductive period<br>age at natural menopause<br>hysterectomy versus not<br>oophorectomy versus not | adjusted for age, Townsend index, ethnicity, smoking status, systolic blood pressure, BMI, diabetes, total cholesterol, antihypertensive drugs, and lipid lowering drugs.                                                                             |
| Changyong Yu, 2022     | case-control | community | 87.16 | NA   | female | 2,039   | cognitive decline | parity                                                                                                                                                                                                                                                                                            | NA                                                                                                                                                                                                                                                    |
| Margot J Overman, 2022 | cohort       | community | 60    | 4    | male   | 2,736   | dementia          | testosterone<br>SHBG                                                                                                                                                                                                                                                                              | adjusted for age, age left education, BMI, BDI score, smoking (non- vs current), alcohol consumption (<1 vs ≥ 1 day/week), psychotropic drug use (none vs any), center, PASE score, PPT walking speed, and co-morbidities (0, 1, or 2 comorbidities). |
| Alison Gemmill, 2022   | cohort       | community | 62.08 | 13   | female | 8,875   | dementia          | age at first birth<br>parity                                                                                                                                                                                                                                                                      | adjusted for race/ethnicity, birthplace, education, parental education, partnership status, smoking status, BMI, depressive symptomology, and medical comorbidities.                                                                                  |
| N. Araújo, 2022        | cohort       | hospital  | 68    | 1    | male   | 366     | cognitive decline | ADT                                                                                                                                                                                                                                                                                               | adjusted for age and education.                                                                                                                                                                                                                       |

|                             |        |           |       |     |        |        |                   |               |                                                                                                                                                                                                                                                                                                                                                                                                                                                                    |
|-----------------------------|--------|-----------|-------|-----|--------|--------|-------------------|---------------|--------------------------------------------------------------------------------------------------------------------------------------------------------------------------------------------------------------------------------------------------------------------------------------------------------------------------------------------------------------------------------------------------------------------------------------------------------------------|
| Joseph L. Saenz, 2021       | cohort | community | >60   | 12  | female | 6,541  | cognitive decline | parity        | adjusted for fertility history and confounding variables (age, rural/urban, marital status, age at first marriage, parental education, own education, and chronic conditions), and employment, income, and wealth to determine whether fertility history-cognition associations were explained by economic mechanisms, and depressive symptoms and loneliness to determine whether fertility history-cognition associations were driven by psychosocial variables. |
| Jui-Ming Liu, 2021          | cohort | community | 70    | >4  | male   | 87,655 | dementia          | ADT           | adjusted for age                                                                                                                                                                                                                                                                                                                                                                                                                                                   |
| Onder Cinar, 2021           | cohort | hospital  | 69.08 | 0.5 | male   | 48     | cognitive decline | ADT           | NA                                                                                                                                                                                                                                                                                                                                                                                                                                                                 |
| Lina Bergman, 2021          | cohort | hospital  | 25    | 0.5 | female | 153    | cognitive decline | pre-eclampsia | NA                                                                                                                                                                                                                                                                                                                                                                                                                                                                 |
| Hector Alonso-Quñones, 2021 | cohort | community | 78    | 3.8 | male   | 241    | cognitive decline | ADT           | adjust for education, APOE genotype, depression, and the Charlson comorbidity index.                                                                                                                                                                                                                                                                                                                                                                               |
| Karl H. Tully, 2019         | cohort | hospital  | 52    | 9.3 | male   | 9,117  | dementia          | ADT           | NA                                                                                                                                                                                                                                                                                                                                                                                                                                                                 |
| Peter E. Lonergan, 2022     | cohort | hospital  | >50   | 7   | male   | 13,570 | dementia          | ADT           | NA                                                                                                                                                                                                                                                                                                                                                                                                                                                                 |



|                   |        |          |     |    |        |        |          |              |  |    |
|-------------------|--------|----------|-----|----|--------|--------|----------|--------------|--|----|
| C.                | S.     |          |     |    |        |        |          |              |  |    |
| Uldbjerg,<br>2022 | cohort | hospital | >60 | 13 | female | 24,851 | dementia | oophorectomy |  | NA |

Abbreviations: ACD: all cause dementia, AD: Alzheimer’s disease, ADT: androgen deprivation therapy, APOE: apolipoprotein E, BMI: body mass index, BPH: benign prostate hyperplasia, CCI: Charlson comorbidity index, CFT: Complex Figure Test, DHEA: dehydroepiandrosterone, GnRHa: gonadotropin-releasing hormone agonist, HDL-C: high-density lipoprotein cholesterol, HRT: hormone replacement therapy, HT: hormone therapy, LDL-C: low-density lipoprotein cholesterol, LH: luteinizing hormone, LH-RH: luteinizing hormone releasing hormone, MCI: mild cognitive impairment, MMSE: mini-mental state examination, NSAIDs: non-steroidal anti-inflammatory drugs, OC: oral contraception, SHBG: sex hormone binding, SLE: systemic lupus erythematosus, VaD: vascular dementia, WHR waist-to-hip ratio.

Appendix F Measurement of the outcomes on included studies.

| <b>First author, year</b>          | <b>Outcome</b>                   | <b>Outcome measurement</b>                                                                                                                                                                                                                                                                     |
|------------------------------------|----------------------------------|------------------------------------------------------------------------------------------------------------------------------------------------------------------------------------------------------------------------------------------------------------------------------------------------|
| Mirjam I. Geerlings, 2002          | dementia<br>AD                   | Dementia: DSM-III-R,<br>AD: NINCDS-ADRDA,<br>three-step diagnostic procedure                                                                                                                                                                                                                   |
| Majon Muller, 2008                 | cognitive decline                | decline in MMSE-score of 4 points or more after<br>4 years of follow-up                                                                                                                                                                                                                        |
| Ellika Andolf, 2020                | ACD                              | ICD-10                                                                                                                                                                                                                                                                                         |
| Chun-Ming Yang, 2015               | AD                               | ICD 9-CM                                                                                                                                                                                                                                                                                       |
| Vanessa Sánchez-Martínez,<br>2021  | cognitive decline                | MMSE score<br>the Brief Scale for Cognitive Evaluation (BCog)<br>score                                                                                                                                                                                                                         |
| M Nelander, 2017                   | dementia                         | ICD codes                                                                                                                                                                                                                                                                                      |
| Yoko Shimizu, 2019                 | cognitive decline                | the Mini Mental State Examination (MMSE), the<br>Wechsler Memory Scale Revised (WMS-R)<br>Logical Memory I/II subtest, the clock drawing<br>test, and the Clinical Dementia Rating (CDR)<br>Scale                                                                                              |
| Kristine Yaffe, 2010               | cognitive decline                | a decline of 3 or more points on the mMMSE<br>from baseline to the 6-year examination.                                                                                                                                                                                                         |
| W.A. Rocca, 2007                   | dementia or<br>cognitive decline | 1) they scored <27 on the TICS-m at direct<br>interview;<br>2) a proxy respondent reported a previous<br>diagnosis of dementia, senility, or AD;<br>3) a proxy respondent reported impairment in<br>activities of daily living (dressing, eating, or<br>bathing) caused by cognitive problems. |
| C.N. Lessov-Schlaggar,<br>2005     | cognitive decline                | MMSE                                                                                                                                                                                                                                                                                           |
| Kohei Okamoto, 2015                | cognitive decline                | MMSE                                                                                                                                                                                                                                                                                           |
| Martin J. Prince, 2018             | dementia                         | two cognitive tests;<br>the 32-item Community Screening Instrument<br>for Dementia (CSI-D) COGSCORE and the<br>modified Consortium to Establish a Registry for<br>Alzheimer's Disease (CERAD) 10-word list<br>learning task with delayed recall                                                |
| Elizabeth Barrette-Conner,<br>1999 | cognitive decline                | MMSE                                                                                                                                                                                                                                                                                           |
| S. D. Chung, 2016                  | AD                               | ICD-9-CM code                                                                                                                                                                                                                                                                                  |
| Kevin T. Nead, 2016                | AD                               | ICD-9 code                                                                                                                                                                                                                                                                                     |
| Jung Eun Yoo, 2020                 | ACD                              | ICD-10 codes                                                                                                                                                                                                                                                                                   |
| Hyesue Jang, 2018                  | cognitive decline;<br>AD         | AD: NINCDS-ADRDA;<br>Cognitive decline: the consensus criteria from<br>the International Working Group on Mild                                                                                                                                                                                 |

|                             |                   |                                                                                                                                                                                                                                                        |
|-----------------------------|-------------------|--------------------------------------------------------------------------------------------------------------------------------------------------------------------------------------------------------------------------------------------------------|
|                             |                   | Cognitive Impairment.                                                                                                                                                                                                                                  |
| Natalie L. Rasgon, 2005     | cognitive decline | TELE, a telephone-based interview score $\leq 13.5$ points (max 19)                                                                                                                                                                                    |
| Li-Ting Kao, 2017           | dementia          | ICD-9-CM codes                                                                                                                                                                                                                                         |
| Kevin T. Nead, 2016         | dementia          | ICD-9 codes                                                                                                                                                                                                                                            |
| Myungsun Shim, 2020         | dementia          | ICD-10 codes                                                                                                                                                                                                                                           |
| David Robinson, 2019        | ACD               | ICD-10 codes                                                                                                                                                                                                                                           |
| Joanne Ryan, 2009           | cognitive decline | Global function, MMSE < -2                                                                                                                                                                                                                             |
| Ineke R. Postma, 2016       | cognitive decline | CDR scale                                                                                                                                                                                                                                              |
| Bulent Gunlusoy, 2016       | cognitive decline | MoCA; FAB tests                                                                                                                                                                                                                                        |
| Sanna L. Read, 2017         | cognitive decline | 16 neurocognitive tests                                                                                                                                                                                                                                |
| S.D. Moffat, 2004           | AD<br>dementia    | DSM-III-R,<br>NINCDS-ADRDA                                                                                                                                                                                                                             |
| Emily W. Harville, 2019     | cognitive decline | Cognitive domains tests                                                                                                                                                                                                                                |
| Majon Muller, 2010          | dementia<br>AD    | Dementia: DSM-IV criteria and required evidence of cognitive deficit on the neuropsychological test battery as well as evidence of impairment in social or occupational function (Clinical Dementia Rating of 1 or more).<br>AD: NINCDS-ADRDA criteria |
| Farzin Khosrow-Khavar, 2016 | dementia<br>AD    | Read codes                                                                                                                                                                                                                                             |
| Gail A. Laughlin, 2010      | cognitive decline | MMSE<br>Trails B<br>Category fluency                                                                                                                                                                                                                   |
| Juan Morote, 2017           | cognitive decline | four domains:1) working memory,2) visual memory,3)visuospatial ability,4)nonverbal analytical reasoning                                                                                                                                                |
| Xingyue Song, 2020          | cognitive decline | Singapore Modified Mini-Mental State Examination (SMMMSE)<br>The cut-off points were 17/18 for subjects with no formal education, 20/21 for subjects with primary school education and 24/25 for those with secondary school or higher education.      |
| Alain K. Koyama, 2016       | cognitive decline | the Telephone Interview of Cognitive Status (TICS).                                                                                                                                                                                                    |
| Leung-Wing Chu, 2010        | AD                | NINCDS-ADRDA criteria; the Chinese versions of Mini-Mental State Examination (MMSE), AD Assessment Scale-cognitive subscale (ADAS-cog), and Delayed 10-Word Recall Test (DWRT)                                                                         |
| Molly Fox, 2018             | AD                | CDR scale                                                                                                                                                                                                                                              |
| Supriya Gupta Mohile, 2010  | cognitive decline | a standardized neuropsychological battery                                                                                                                                                                                                              |
| Ellika G Andolf, 2007       | dementia.         | ICD 9                                                                                                                                                                                                                                                  |

|                               |                                  |                                                                                                                                                                                                                                          |
|-------------------------------|----------------------------------|------------------------------------------------------------------------------------------------------------------------------------------------------------------------------------------------------------------------------------------|
| Jenna Najar, 2020             | dementia<br>AD                   | DSM-III-R criteria<br>NINCDS-ADRDA                                                                                                                                                                                                       |
| Kristine Yaffe, 1998          | cognitive decline                | MMSE, -12.5 points or more                                                                                                                                                                                                               |
| Wen-Kuan Huang, 2020          | dementia<br>AD                   | ICD-9-CM and ICD-10-CM codes                                                                                                                                                                                                             |
| Saima Basit, 2018             | dementia<br>AD                   | ICD-10                                                                                                                                                                                                                                   |
| Mette Norgaard, 2021          | dementia<br>AD                   | ICD-10                                                                                                                                                                                                                                   |
| Hung-Tse Chou, 2021           | cognitive decline                | A MMSE cut-off score of 24                                                                                                                                                                                                               |
| J Ryan, 2014                  | cognitive decline<br>dementia    | MMSE decline >3<br>a three-step procedure,<br>double blind diagnosis based on ICD-IV                                                                                                                                                     |
| fu-Dong Li, 2020              | cognitive decline                | MMSE                                                                                                                                                                                                                                     |
| Laure Carcaillon, 2014        | dementia<br>AD                   | Dementia: A 2-step procedure: a neuropsychological examination; DSM-IV-R criteria for dementia,<br>AD: NINCDS-ADRDA                                                                                                                      |
| Bum Sik Tae, 2018             | cognitive decline                | ICD-10 codes                                                                                                                                                                                                                             |
| Bushra Intiaz, 2014           | AD                               | NINCDS-ADRDA and the DSM-IV                                                                                                                                                                                                              |
| K. Yaffe, 2006                | cognitive decline                | 3MS decline scoring $\geq 5$ fewer points                                                                                                                                                                                                |
| Thien Kieu Thi Phung, 2010    | dementia                         | ICD codes                                                                                                                                                                                                                                |
| Julie A. Fields, 2017         | dementia or<br>cognitive decline | Cognitive decline: mild impairment on two or more measures within a single domain, or mild impairment on one or more measure within at least two domains. dementia: cognitive deficits $\geq 2SD$ below the mean in two or more domains. |
| Keiko Kurita, 2016            | cognitive decline                | The cognitive battery                                                                                                                                                                                                                    |
| Sri Suravarapu, 2006          | dementia                         | Diagnostic and Statistical Manual of Mental Disorders, 4th ed                                                                                                                                                                            |
| Ravishankar Jayadevappa, 2018 | dementia;<br>AD                  | (International Classification of Diseases, Ninth Revision, Clinical Modification [ICD-9-CM] codes 290, 29420, 29411, 29282, 2912, and 29421) or Alzheimer disease (ICD-9-CM code 3310)                                                   |
| Paola Gilsanz, 2019           | dementia                         | Electronic medical records using the following ICD10 diagnosis codes                                                                                                                                                                     |
| Onder Cinar, 2021             | cognitive decline                | Neuropsychological tests                                                                                                                                                                                                                 |
| Joanne Ryan, 2012             | cognitive decline                | The neuropsychological test battery                                                                                                                                                                                                      |
| Seo Hyon Baik, 2017           | AD<br>dementia                   | CMS coding                                                                                                                                                                                                                               |
| Mirjam I. Geerlings, 2001     | dementia<br>AD                   | dementia: DSM- III,<br>AD: NINCDS-ADRDA                                                                                                                                                                                                  |

|                              |                   |                                                                                                                                                                                                                     |
|------------------------------|-------------------|---------------------------------------------------------------------------------------------------------------------------------------------------------------------------------------------------------------------|
| Jong Bin Bae, 2020           | dementia          | DSM-IV criteria                                                                                                                                                                                                     |
| Michelle M. Mielke, 2016     | cognitive decline | MMSE                                                                                                                                                                                                                |
| L.-F. Low, 2005              | cognitive decline | MMSE                                                                                                                                                                                                                |
| Michelle Heys, 2010          | cognitive decline | CERAD (Consortium to Establish a Registry for Alzheimer's Disease) test battery                                                                                                                                     |
| Erin S. LeBlanc, 2010        | cognitive decline | 3MS (-10 as the cut point)                                                                                                                                                                                          |
| Yasin Ceylan, 2019           | cognitive decline | A verbal learning test (immediate recall and 1-minute delay), the Mini-Mental State Examination (MMSE), digit span backwards, the Symbol-Digit Modalities Test and simple and choice reaction time tests            |
| Mirjam I. Geerlings, 2006    | dementia<br>AD    | Dementia: DSM- III, DSM-IV criteria,<br>AD: NINCDS-ADRDA                                                                                                                                                            |
| Laure Carcaillon, 2013       | dementia<br>AD    | Dementia: DSM-IV criteria, CDR scale,<br>AD: NINCDS-ADRDA                                                                                                                                                           |
| Shabbir M.H. Alibhai, 2016   | cognitive decline | 14 neuropsychological tests                                                                                                                                                                                         |
| Jihun Kang, 2020             | dementia<br>AD    | ICD codes                                                                                                                                                                                                           |
| Saima Basit, 2019            | dementia<br>AD    | ICD-10                                                                                                                                                                                                              |
| Riley Bove, 2014             | AD                | AD: NINCDS-ADRDA criteria (a 2-step process)                                                                                                                                                                        |
| A. Paganini-Hill, 2020       | dementia          | (1) neurological examination, (2) MMSE, (3) informant questionnaires, and (4) CASI-short DSM-IV criteria                                                                                                            |
| Sujarwoto Sujarwoto, 2019    | cognitive decline | Telephone Survey of Cognitive Status (TICS)                                                                                                                                                                         |
| Robert N. McLay, 2003        | cognitive decline | MMSE                                                                                                                                                                                                                |
| Carolien N.H. Abheiden, 2015 | AD                | Medical records                                                                                                                                                                                                     |
| Jong Won Kim, 2021           | dementia<br>AD    | ICD-10 codes                                                                                                                                                                                                        |
| Andrew H, 2018               | dementia          | Medical records                                                                                                                                                                                                     |
| Chiara Zucchella, 2012       | AD                | the NINCDS-ADRDA criteria                                                                                                                                                                                           |
| Giovanni Ravaglia, 2007      | dementia<br>AD    | DSM-IV;<br>NINCDS-ADRDA;                                                                                                                                                                                            |
| Fu-Dong Li, 2015             | cognitive decline | cut-off point to define cognitive impairment in China (MMSE Chinese Standard, MCS): 17/18 for illiteracy, 20/21 for people with primary education level, 24/25 for people with higher than primary education level. |
| Jessica Gong, 2022           | dementia          | ICD-10 codes                                                                                                                                                                                                        |
| Changyong Yu, 2022           | cognitive decline | MMSE                                                                                                                                                                                                                |
| Margot J Overman, 2022       | dementia          | the Rey-Osterrieth Complex Figure Copy and                                                                                                                                                                          |

|                             |                   |                                                                                                                                                                                                                                       |
|-----------------------------|-------------------|---------------------------------------------------------------------------------------------------------------------------------------------------------------------------------------------------------------------------------------|
|                             |                   | Recall, the Camden Topographical Recognition Memory and the Digit Symbol Substitution Test.                                                                                                                                           |
| Alison Gemmill, 2022        | dementia          | cognitive scale                                                                                                                                                                                                                       |
| N. Araújo, 2022             | cognitive decline | MOCA                                                                                                                                                                                                                                  |
| Joseph L. Saenz, 2021       | cognitive decline | cognitive tasks                                                                                                                                                                                                                       |
| Jui-Ming Liu, 2021          | dementia          | ICD codes                                                                                                                                                                                                                             |
| Onder Cinar, 2021           | cognitive decline | four neuropsychological tests, including the Symbol Digit Modalities Test (SDMT), the California Verbal Learning Test, second edition (CVLT-II); the Brief Visuospatial Memory Test—Revised (BVMTR); and the Trail Making Test (TMT). |
| Lina Bergman, 2021          | cognitive decline | MOCA                                                                                                                                                                                                                                  |
| Hector Alonso-Quñones, 2021 | cognitive decline | the neuropsychological battery                                                                                                                                                                                                        |
| Karl H. Tully, 2019         | dementia          | ICD-9 codes                                                                                                                                                                                                                           |
| Peter E. Lonergan, 2022     | dementia          | ICD codes                                                                                                                                                                                                                             |
| C. S. Uldbjerg, 2022        | dementia          | ICD codes                                                                                                                                                                                                                             |

Abbreviations: CDR, the Clinical Dementia Rating scale; DSM: Diagnostic and Statistical Manual of Mental Disorders; ICD, International Classification of Diseases; MMSE, Mini-Mental State Examination; MoCA, Montreal cognitive assessment; NINCDS-ADRDA, National Institute of Neurological and Communicative Disorders and Stroke and the Alzheimer's Disease and Related Disorders Association criteria.

Appendix G Characteristics of studies with cognitive decline, dementia, and AD.

1. Characteristics of studies with cognitive decline, dementia, and AD by menstrual and parity.

a) Characteristics of studies with cognitive decline, dementia, and AD by age at menarche.

| Author               | Project                             | Year | Description of risk factor | RR/OR/<br>HR | Adjusted<br>risk | LCI   | UCI    | Outcome              | design           | Country                         | Sample    | Case  | Score |
|----------------------|-------------------------------------|------|----------------------------|--------------|------------------|-------|--------|----------------------|------------------|---------------------------------|-----------|-------|-------|
| Yoko Shimizu         | JPHC Study                          | 2019 | Age at menarche, years     |              |                  |       |        | cognitive<br>decline | cohort           | Japan                           | 670       | 196   | 7.5   |
|                      |                                     |      | ≤ 13 (ref.)                | OR           | 1.00             | 1.00  | 1.00   |                      |                  |                                 | 238       | 63    |       |
|                      |                                     |      | 14-15                      | OR           | 1.28             | 0.87  | 1.89   |                      |                  |                                 | 320       | 113   |       |
|                      |                                     |      | ≥ 16                       | OR           | 1.70             | 0.96  | 2.99   |                      |                  |                                 | 92        | 46    |       |
| Hyesue Jang          | KLOSCAD+<br>HELIAD                  | 2018 | Age at menopause           | OR           | 0.99             | 0.95  | 1.04   | cognitive<br>decline | case-<br>control | Korea                           | 3,549     | 896   | 5.5   |
| Natalie L.<br>Rasgon | HARMONY                             | 2005 | Age at menarche, years     |              |                  |       |        | cognitive<br>decline | case-<br>control | US                              | 1111/4733 | 1,111 | 6     |
|                      |                                     |      | <12                        | OR           | 1.21             | 0.85  | 173.00 |                      |                  |                                 | 234       | 42    |       |
|                      |                                     |      | 12-14 (ref.)               | OR           | 1.00             | 1.00  | 1.00   |                      |                  |                                 | 3,426     | 592   |       |
|                      |                                     |      | >14                        | OR           | 1.19             | 1.03  | 1.38   |                      |                  |                                 | 1,816     | 372   |       |
| Joanne Ryan          | ESPRIT                              | 2009 | Age at first Menses        | OR           | 1.05             | 0.95  | 1.16   | cognitive<br>decline | cohort           | France                          | 996       | NA    | 4.5   |
| Xingyue Song         | SCHS                                | 2020 | Age at menarche, years     |              |                  |       |        | cognitive<br>decline | cohort           | Singapore                       | 8,222     | 1,332 | 7.5   |
|                      |                                     |      | <13 (ref.)                 | OR           | 1.00             | 1.00  | 1.00   |                      |                  |                                 | 2,034     | 260   |       |
|                      |                                     |      | 13-14                      | OR           | 1.02             | 0.86  | 1.22   |                      |                  |                                 | 3,046     | 459   |       |
|                      |                                     |      | 15-16                      | OR           | 1.13             | 0.94  | 1.36   |                      |                  |                                 | 2,325     | 430   |       |
|                      |                                     |      | >16                        | OR           | 1.18             | 0.93  | 1.49   |                      |                  |                                 | 817       | 183   |       |
|                      |                                     |      | Per 1-year increase        | OR           | 1.04             | 1.00  | 1.07   |                      |                  |                                 |           |       |       |
| Martin J.<br>Prince  | 10/66<br>population-<br>based study | 2018 | Age at menarche, years     | HR           | 0.986            | 0.944 | 1.030  | dementia             | cohort           | Cuba,<br>Dominican<br>Republic, | 8466      | 692   | 5.5   |

|                     |                     |      |                        |    |      |      |          |          |             |                                                        |           |     |        |
|---------------------|---------------------|------|------------------------|----|------|------|----------|----------|-------------|--------------------------------------------------------|-----------|-----|--------|
|                     |                     |      |                        |    |      |      |          |          |             | Puerto Rico<br>Venezuela,<br>Mexico,<br>Peru,<br>China |           |     |        |
| Jung Eun Yoo        | NCSP                | 2020 | Age at menarche, years |    |      |      | dementia | cohort   | Korea       | 4,696,633                                              | 212,227   | 7   |        |
|                     |                     |      | ≤ 12                   | HR | 1.07 | 1.01 |          |          |             | 1.14                                                   | 63,275    |     | 1134   |
|                     |                     |      | 13-14 (ref.)           | HR | 1.00 | 1.00 |          |          |             | 1.00                                                   | 680953    |     | 15339  |
|                     |                     |      | 15-16                  | HR | 1.07 | 1.05 |          |          |             | 1.09                                                   | 1879203   |     | 70707  |
|                     |                     |      | ≥ 17                   | HR | 1.15 | 1.13 |          |          |             | 1.16                                                   | 2,073,202 |     | 125047 |
| Paola Gilsanz       | KPNC                | 2019 | Menarche, years        |    |      |      | dementia | cohort   | US          | 6,137                                                  | 2577      | 7   |        |
|                     |                     |      | <13.0                  | HR | 0.97 | 0.88 |          |          |             | 1.07                                                   |           |     | 1,516  |
|                     |                     |      | ≥13.0 (ref.)           | HR | 1.00 | 1.00 |          |          |             | 1.00                                                   |           |     | 2,531  |
|                     |                     |      | ≤10                    | HR | 0.89 | 0.63 |          |          |             | 1.26                                                   |           |     | 95     |
|                     |                     |      | 11-12                  | HR | 1.00 | 0.89 |          |          |             | 1.13                                                   |           |     | 1,421  |
|                     |                     |      | 13 (average) (ref.)    | HR | 1.00 | 1.00 |          |          |             | 1.00                                                   |           |     | 1,188  |
|                     |                     |      | 14-15                  | HR | 1.03 | 0.91 |          |          |             | 1.17                                                   |           |     | 1,085  |
|                     |                     |      | 16-17                  | HR | 1.23 | 1.01 |          |          |             | 1.5                                                    |           |     | 258    |
| Mirjam I. Geerlings | The Rotterdam Study | 2001 | Age at menarche, years |    |      |      | dementia | cohort   | Netherlands | 3588                                                   | 199       | 5   |        |
|                     |                     |      | >14 (ref.)             | RR | 1.00 | 1.00 |          |          |             | 1.00                                                   | 61        |     |        |
|                     |                     |      | 14                     | RR | 0.89 | 0.57 |          |          |             | 1.29                                                   | 37        |     |        |
|                     |                     |      | 13                     | RR | 1.00 | 0.67 |          |          |             | 1.5                                                    | 40        |     |        |
|                     |                     |      | <12                    | RR | 1.18 | 0.82 |          |          |             | 1.7                                                    | 61        |     |        |
| Jenna Najjar        | PPSW                | 2020 | Age at menarche        | HR | 0.99 | 0.91 | 1.09     | dementia | cohort      | Sweden                                                 | 1364      | 291 | 7      |



|                     |                     |      |                        |    |      |      |      |          |        |             |           |         |     |
|---------------------|---------------------|------|------------------------|----|------|------|------|----------|--------|-------------|-----------|---------|-----|
| A. Paganini-Hill    | The 90+ Study       | 2020 | Age at menarche, years |    |      |      |      | dementia | cohort | US          | 424       | 209     | 5.5 |
|                     |                     |      | ≤12 (ref.)             | HR | 1.00 | 1.00 | 1.00 |          |        |             | 145       | 67      |     |
|                     |                     |      | 13                     | HR | 1.22 | 0.87 | 1.72 |          |        |             | 130       | 68      |     |
|                     |                     |      | 14+                    | HR | 0.85 | 0.61 | 1.19 |          |        |             | 149       | 74      |     |
| Jessica Gong        | UK Biobank          | 2022 | Age at menarche, years |    |      |      |      | dementia | cohort | UK          | 273,240   |         | 6.5 |
|                     |                     |      | <12                    | HR | 1.20 | 1.08 | 1.34 |          |        |             |           | 385     |     |
|                     |                     |      | 12                     | HR | 1.07 | 0.95 | 1.20 |          |        |             |           | 331     |     |
|                     |                     |      | 13 (ref.)              | HR | 1.00 | 1.00 | 1.00 |          |        |             |           | 372     |     |
|                     |                     |      | 14                     | HR | 0.97 | 0.87 | 1.09 |          |        |             |           | 334     |     |
|                     |                     |      | >14                    | HR | 1.19 | 1.07 | 1.34 |          |        |             |           | 341     |     |
| Jung Eun Yoo        | NCSP                | 2020 | Age at menarche, years |    |      |      |      | AD       | cohort | Korea       | 4,696,633 | 162,901 | 7   |
|                     |                     |      | ≤ 12                   | HR | 1.06 | 0.99 | 1.14 |          |        |             | 63,275    | 848     |     |
|                     |                     |      | 13-14 (ref.)           | HR | 1.00 | 1.00 | 1.00 |          |        |             | 680,953   | 11,663  |     |
|                     |                     |      | 15-16                  | HR | 1.06 | 1.04 | 1.09 |          |        |             | 1,879,203 | 54,154  |     |
|                     |                     |      | ≥ 17                   | HR | 1.14 | 1.12 | 1.16 |          |        |             | 2,073,202 | 96,236  |     |
| Mirjam I. Geerlings | The Rotterdam Study | 2001 | Age at menarche, years |    |      |      |      | AD       | cohort | Netherlands | 3588      | 155     | 6.5 |
|                     |                     |      | > 14 (ref.)            | RR | 1.00 | 1.00 | 1.00 |          |        |             |           | 52      |     |
|                     |                     |      | 14                     | RR | 0.76 | 0.48 | 1.21 |          |        |             |           | 28      |     |
|                     |                     |      | 13                     | RR | 0.89 | 0.56 | 1.4  |          |        |             |           | 30      |     |
|                     |                     |      | <12                    | RR | 1.15 | 0.77 | 1.72 |          |        |             |           | 49      |     |
| Jenna Najjar        | PPSW                | 2020 | Age at menarche        | HR | 1.01 | 0.89 | 1.15 | AD       | cohort | Sweden      | 1364      | 146     | 7   |

b) Characteristics of studies with cognitive decline, dementia, and AD by length of menstrual cycle.

| Author       | Project    | Year | Description of risk factor | RR/OR/HR | Adjusted risk | LCI  | UCI  | Outcome           | design       | Country | Sample | Case | Score |
|--------------|------------|------|----------------------------|----------|---------------|------|------|-------------------|--------------|---------|--------|------|-------|
| Yoko Shimizu | JPHC Study | 2019 | Menstrual cycle length     |          |               |      |      | cognitive decline | cohort       | Japan   | 670    | 196  | 7.5   |
|              |            |      | ≤ 26 (ref.)                | OR       | 1.00          | 1.00 | 1.00 |                   |              |         | 107    | 29   |       |
|              |            |      | 27-29                      | OR       | 1.16          | 0.69 | 1.95 |                   |              |         | 264    | 90   |       |
|              |            |      | ≥ 30                       | OR       | 1.24          | 0.64 | 2.39 |                   |              |         | 81     | 29   |       |
| Fu-Dong Li   | ZPHS       | 2015 | Length of menstrual cycle  | OR       | 1.01          | 0.98 | 1.04 | cognitive decline | case-control | CN      | 4,796  | 919  | 7     |

c) Characteristics of studies with cognitive decline, dementia, and AD by menstrual regularity.

| Author       | Project    | Year | Description of risk factor              | RR/OR/<br>HR | Adjusted<br>risk | LCI  | UCI  | Outcome           | design       | Country | Sample | Case | Score |
|--------------|------------|------|-----------------------------------------|--------------|------------------|------|------|-------------------|--------------|---------|--------|------|-------|
| Yoko Shimizu | JPHC Study | 2019 | Menstrual regularity                    |              |                  |      |      | cognitive decline | cohort       | Japan   | 619    | 196  | 7.5   |
|              |            |      | Regular (ref.)                          | OR           | 1.00             | 1.00 | 1.00 |                   |              |         | 494    | 161  |       |
|              |            |      | Irregular                               | OR           | 1.13             | 0.74 | 1.73 |                   |              |         | 125    | 44   |       |
| Fu-Dong Li   | ZPHS       | 2015 | Regularity of menstrual cycle (regular) | OR           | 0.89             | 0.64 | 1.23 | cognitive decline | case-control | CN      | 4,796  | 919  | 7     |

d) Characteristics of studies with cognitive decline, dementia, and AD by age at menopause.

| Author            | Project    | Year | Description of risk factor | RR/OR /HR | Adjusted risk | LCI  | UCI  | Outcome           | design       | Country   | Sample | Case | Score |
|-------------------|------------|------|----------------------------|-----------|---------------|------|------|-------------------|--------------|-----------|--------|------|-------|
| Yoko Shimizu      | JPHC Study | 2019 | Age at menopause, years    |           |               |      |      | cognitive decline | cohort       | Japan     | 670    | 196  | 7.5   |
|                   |            |      | ≤ 44 (ref.)                | OR        | 1.00          | 1.00 | 1.00 |                   |              |           | 58     | 23   |       |
|                   |            |      | 45-49                      | OR        | 0.97          | 0.52 | 1.79 |                   |              |           | 192    | 76   |       |
|                   |            |      | ≥ 50                       | OR        | 0.75          | 0.42 | 1.35 |                   |              |           | 341    | 117  |       |
| Xingyue Song      | SCHS       | 2020 | Age at menopause, years    |           |               |      |      | cognitive decline | cohort       | Singapore | 8222   | 1332 | 7.5   |
|                   |            |      | <45                        | OR        | 1.67          | 1.32 | 2.11 |                   |              |           | 508    | 131  |       |
|                   |            |      | 45-49                      | OR        | 1.24          | 1.08 | 1.44 |                   |              |           | 2291   | 419  |       |
|                   |            |      | 50-54 (ref.)               | OR        | 1.00          | 1.00 | 1.00 |                   |              |           | 4361   | 600  |       |
|                   |            |      | 54                         | OR        | 1.06          | 0.87 | 1.29 |                   |              |           | 1062   | 182  |       |
|                   |            |      | Per 1-year increase        | OR        | 0.97          | 0.96 | 0.99 |                   |              |           |        |      |       |
| Joanne Ryan       | ESPRIT     | 2009 | Age at menopause           | OR        | 0.99          | 0.96 | 1.02 | cognitive decline | cohort       | France    | 996    | NA   | 4.5   |
| J Ryan            | TCS        | 2014 | Age at menopause, years    |           |               |      |      | cognitive decline | cohort       | France    | 4868   | NA   | 7     |
|                   |            |      | After 50 (ref.)            | HR        | 1.00          | 1.00 | 1.00 |                   |              |           | 2005   |      |       |
|                   |            |      | 46-50                      | HR        | 0.96          | 0.82 | 1.13 |                   |              |           | 1871   |      |       |
|                   |            |      | 41-45                      | HR        | 0.83          | 0.66 | 1.04 |                   |              |           | 621    |      |       |
|                   |            |      | 40 or before               | HR        | 1.35          | 1.05 | 1.74 |                   |              |           | 371    |      |       |
| Natalie L. Rasgon | HARMONY    | 2005 | Age at menopause, years    |           |               |      |      | cognitive decline | case-control | US        | 5844   | 1111 | 6     |
|                   |            |      | <40                        | OR        | 1.64          | 1.03 | 2.61 |                   |              |           | 102    | 27   |       |
|                   |            |      | 40-44                      | OR        | 1.39          | 1.08 | 1.78 |                   |              |           | 438    | 102  |       |
|                   |            |      | 45-49                      | OR        | 1.01          | 0.85 | 1.20 |                   |              |           | 1414   | 259  |       |
|                   |            |      | 50-54 (ref.)               | OR        | 1.00          | 1.00 | 1.00 |                   |              |           | 2602   | 471  |       |

|                  |                                     |      |                                      |    |      |      |      |                   |              |                                                                      |           |         |     |         |        |
|------------------|-------------------------------------|------|--------------------------------------|----|------|------|------|-------------------|--------------|----------------------------------------------------------------------|-----------|---------|-----|---------|--------|
|                  |                                     |      | > 54                                 | OR | 0.96 | 0.77 | 1.19 |                   |              |                                                                      | 823       | 134     |     |         |        |
| Hyesue Jang      | KLOSCAD+ HELIAD                     | 2018 | Age at menopause                     | OR | 0.99 | 0.95 | 1.04 | cognitive decline | case-control | Korea                                                                | 3549      | 896     | 5.5 |         |        |
| W.A. Rocca       | MCOSOA                              | 2007 | Age at bilateral oophorectomy, years |    |      |      |      | cognitive decline | cohort       | US                                                                   | 2961      |         | 7   |         |        |
|                  |                                     |      | T1 (<43)                             | HR | 1.74 | 0.97 | 3.14 |                   |              |                                                                      |           |         |     | 13      |        |
|                  |                                     |      | T2 (43–48)                           | HR | 1.68 | 1.06 | 2.66 |                   |              |                                                                      |           |         |     | 23      |        |
|                  |                                     |      | T3 (>48)                             | HR | 1.09 | 0.74 | 1.61 |                   |              |                                                                      |           |         |     | 38      |        |
|                  |                                     |      | T1 +T2 (≤48)                         | HR | 1.70 | 1.15 | 2.51 |                   |              |                                                                      |           |         |     | 36      |        |
| Martin J. Prince | 10/66 population-based cohort study | 2018 | Age at menopause, years              | HR | 1.00 | 0.99 | 1.01 | dementia          | cohort       | Cuba, Dominican Republic, Puerto Rico, Venezuel, Mexico, Peru, China | 8466      | 692     | 5.5 |         |        |
| Jung Eun Yoo     | NCSP                                | 2020 | Age at menopause, years              |    |      |      |      | dementia          | cohort       | Korea                                                                | 4,696,633 | 212,227 | 7   |         |        |
|                  |                                     |      | < 40 (ref.)                          | HR | 1.00 | 1.00 | 1.00 |                   |              |                                                                      |           |         |     | 76635   | 6308   |
|                  |                                     |      | 40-44                                | HR | 0.96 | 0.93 | 0.98 |                   |              |                                                                      |           |         |     | 248056  | 18440  |
|                  |                                     |      | 45-49                                | HR | 0.89 | 0.86 | 0.91 |                   |              |                                                                      |           |         |     | 1218122 | 59452  |
|                  |                                     |      | 50-54                                | HR | 0.85 | 0.83 | 0.87 |                   |              |                                                                      |           |         |     | 2601970 | 106193 |
|                  |                                     |      | ≥ 55                                 | HR | 0.79 | 0.77 | 0.81 |                   |              |                                                                      |           |         |     | 551850  | 21834  |
| Paola Gilsanz    | KPNC                                | 2019 | Menopause, years (surgical)          |    |      |      |      | dementia          | cohort       | US                                                                   | 6,137     | 2577    | 7   |         |        |
|                  |                                     |      | <47.4 (mean)                         | HR | 1.19 | 1.07 | 1.31 |                   |              |                                                                      |           |         |     | 1,645   |        |
|                  |                                     |      | ≥47.4 (ref.)                         | HR | 1.00 | 1.00 | 1.00 |                   |              |                                                                      |           |         |     | 2,402   |        |
|                  |                                     |      | ≤30                                  | HR | 1.11 | 0.59 | 2.09 |                   |              |                                                                      |           |         |     | 25      |        |

|                     |                     |      |                            |    |      |      |      |          |        |             |       |      |     |
|---------------------|---------------------|------|----------------------------|----|------|------|------|----------|--------|-------------|-------|------|-----|
|                     |                     |      | 31–40                      | HR | 1.20 | 0.98 | 1.45 |          |        |             | 342   |      |     |
|                     |                     |      | 41–45                      | HR | 1.29 | 1.12 | 1.49 |          |        |             | 745   |      |     |
|                     |                     |      | 46–50                      | HR | 0.99 | 0.88 | 1.11 |          |        |             | 1,891 |      |     |
|                     |                     |      | 51–55 (ref.)               | HR | 1.00 | 1.00 | 1.00 |          |        |             | 1,044 |      |     |
| Paola Gilsanz       | KPNC                | 2019 | Menopause, years (natural) |    |      |      |      | dementia | cohort | US          | 6,137 | 2577 | 7   |
|                     |                     |      | <48.5 (mean)               | HR | 1.15 | 1.03 | 1.28 |          |        |             | 1,239 |      |     |
|                     |                     |      | ≥48.5 (ref.)               | HR | 1.00 | 1.00 | 1.00 |          |        |             | 1,952 |      |     |
|                     |                     |      | <47.4                      | HR | 1.27 | 1.14 | 1.43 |          |        |             | 926   |      |     |
|                     |                     |      | ≥47.4                      | HR | 1.00 | 1.00 | 1.00 |          |        |             | 2,265 |      |     |
|                     |                     |      | ≤30                        | HR | 1.55 | 0.73 | 3.30 |          |        |             | 13    |      |     |
|                     |                     |      | 31–40                      | HR | 1.26 | 0.99 | 1.60 |          |        |             | 165   |      |     |
|                     |                     |      | 41–45                      | HR | 1.42 | 1.21 | 1.67 |          |        |             | 436   |      |     |
|                     |                     |      | 46–50                      | HR | 1.01 | 0.90 | 1.14 |          |        |             | 1,533 |      |     |
|                     |                     |      | 51–55                      | HR | 1.00 | 1.00 | 1.00 |          |        |             | 1,044 |      |     |
| Mirjam I. Geerlings | The Rotterdam Study | 2001 | Age at menopause, years    |    |      |      |      | dementia | cohort | Netherlands | 3588  | 199  | 6.5 |
|                     |                     |      | <48 (ref.)                 | RR | 1.00 | 1.00 | 1.00 |          |        |             | 32    |      |     |
|                     |                     |      | 48-49                      | RR | 1.24 | 0.72 | 2.15 |          |        |             | 23    |      |     |
|                     |                     |      | 50-52                      | RR | 1.95 | 1.28 | 2.96 |          |        |             | 75    |      |     |
|                     |                     |      | >52                        | RR | 1.78 | 1.11 | 2.88 |          |        |             | 37    |      |     |
| Jenna Najar         | PPSW                | 2020 | Age at menopause           | HR | 1.07 | 1.04 | 1.10 | dementia | cohort | Sweden      | 1364  | 291  | 7   |
| J Ryan              | TCS                 | 2014 | Age at menopause, years    |    |      |      |      | dementia | cohort | France      | 4868  | 393  | 7   |
|                     |                     |      | After 50 (ref.)            | HR | 1.00 | 1.00 | 1.00 |          |        |             | 2005  |      |     |
|                     |                     |      | 46–50                      | HR | 1.23 | 0.92 | 1.64 |          |        |             | 1871  |      |     |
|                     |                     |      | 41–45                      | HR | 1.13 | 0.77 | 1.67 |          |        |             | 621   |      |     |
|                     |                     |      | 40 or before               | HR | 1.23 | 0.76 | 2.00 |          |        |             | 371   |      |     |

|                     |                     |      |                                 |                                     |      |      |          |          |             |           |         |     |      |     |
|---------------------|---------------------|------|---------------------------------|-------------------------------------|------|------|----------|----------|-------------|-----------|---------|-----|------|-----|
| A. Paganini-Hill    | The Study           | 90+  | 2020                            | Age at last menstrual period, years |      |      |          | dementia | cohort      | US        | 424     | 209 | 5.5  |     |
|                     |                     |      |                                 | 44 (ref.)                           | HR   | 1.00 | 1.00     |          |             |           | 1.00    | 99  |      | 43  |
|                     |                     |      |                                 | 45-54                               | HR   | 1.19 | 0.84     |          |             |           | 1.68    | 262 |      | 137 |
|                     |                     |      |                                 | 55+                                 | HR   | 1.13 | 0.70     |          |             |           | 1.82    | 59  |      | 28  |
| Jessica Gong        | UK Biobank          | 2022 | Age at natural menopause, years |                                     |      |      | dementia | cohort   | UK          | 273,240   |         | 6.5 |      |     |
|                     |                     |      | <47                             | HR                                  | 1.32 | 1.15 |          |          |             |           | 1.51    |     | 242  |     |
|                     |                     |      | 47 to 49                        | HR                                  | 1.07 | 0.91 |          |          |             |           | 1.26    |     | 161  |     |
|                     |                     |      | 50 (ref)                        | HR                                  | 1.00 | 0.86 |          |          |             |           | 1.17    |     | 180  |     |
|                     |                     |      | 51 to 52                        | HR                                  | 0.8  | 0.68 |          |          |             |           | 0.94    |     | 173  |     |
|                     |                     |      | 53 to 54                        | HR                                  | 0.76 | 0.62 |          |          |             |           | 0.93    |     | 107  |     |
| >54                 | HR                  | 0.93 | 0.8                             | 1.08                                | 193  |      |          |          |             |           |         |     |      |     |
| Jung Eun Yoo        | NCSP                | 2020 | Age at menopause, years         |                                     |      |      | AD       | cohort   | Korea       | 4,696,633 | 162,901 | 7   |      |     |
|                     |                     |      | < 40 (ref.)                     | HR                                  | 1    |      |          |          |             |           |         |     |      |     |
|                     |                     |      | 40-44                           | HR                                  | 0.96 | 0.93 |          |          |             |           |         |     | 0.99 |     |
|                     |                     |      | 45-49                           | HR                                  | 0.88 | 0.86 |          |          |             |           |         |     | 0.91 |     |
|                     |                     |      | 50-54                           | HR                                  | 0.85 | 0.82 |          |          |             |           |         |     | 0.87 |     |
| ≥ 55                | HR                  | 0.79 | 0.77                            | 0.82                                |      |      |          |          |             |           |         |     |      |     |
| Mirjam I. Geerlings | The Rotterdam Study | 2001 | Age at menopause, years         |                                     |      |      | AD       | cohort   | Netherlands | 3588      | 155     | 6.5 |      |     |
|                     |                     |      | <48 (ref.)                      | RR                                  | 1.00 | 1.00 |          |          |             |           | 1.00    |     | 30   |     |
|                     |                     |      | 48-49                           | RR                                  | 0.90 | 0.48 |          |          |             |           | 1.68    |     | 16   |     |
|                     |                     |      | 50-52                           | RR                                  | 1.64 | 1.05 |          |          |             |           | 2.56    |     | 60   |     |
| >52                 | RR                  | 1.47 | 0.88                            | 2.46                                | 29   |      |          |          |             |           |         |     |      |     |
| Jenna Najjar        | PPSW                | 2020 | Age at menopause                | HR                                  | 1.07 | 1.02 | 1.12     | AD       | cohort      | Sweden    | 1364    | 146 | 7    |     |
| Riley Bove          | POS, MAP            | 2014 | Age at surgical menopause       | HR                                  | 0.99 | 0.98 | 1.00     | AD       | cohort      | US        | 1,884   | 592 | 5.5  |     |

|             |                    |      |                  |    |      |      |      |    |                  |       |      |     |     |
|-------------|--------------------|------|------------------|----|------|------|------|----|------------------|-------|------|-----|-----|
| Hyesue Jang | KLOSCAD+<br>HELIAD | 2018 | Age at menopause | OR | 1.05 | 0.92 | 1.19 | AD | case-<br>control | Korea | 3549 | 118 | 5.5 |
|-------------|--------------------|------|------------------|----|------|------|------|----|------------------|-------|------|-----|-----|



e) Characteristics of studies with cognitive decline, dementia, and AD by reproductive period.

| Author            | Project                | Year | Description of risk factor | RR/OR/HR | Adjusted risk | LCI  | UCI  | Outcome           | design       | Country                          | Sample    | Case | Score |
|-------------------|------------------------|------|----------------------------|----------|---------------|------|------|-------------------|--------------|----------------------------------|-----------|------|-------|
| Yoko Shimizu      | JPHC Study             | 2019 | Reproductive period, years |          |               |      |      | cognitive decline | cohort       | Japan                            | 670       | 196  | 7.5   |
|                   |                        |      | ≤ 33 (ref.)                | OR       | 1.00          | 1.00 | 1.00 |                   |              |                                  | 171       | 73   |       |
|                   |                        |      | 34-37                      | OR       | 0.89          | 0.58 | 1.38 |                   |              |                                  | 191       | 75   |       |
|                   |                        |      | ≥ 38                       | OR       | 0.62          | 0.40 | 0.96 |                   |              |                                  | 210       | 63   |       |
| Xingyue Song      | SCHS                   | 2020 | Reproductive period, years |          |               |      |      | cognitive decline | cohort       | Singapore                        | 8222      | 1332 | 7.5   |
|                   |                        |      | <35 years                  | OR       | 1.28          | 1.11 | 1.48 |                   |              |                                  | 2193      | 477  |       |
|                   |                        |      | 35–39 years (ref.)         | OR       | 1.00          | 1.00 | 1.00 |                   |              |                                  | 4155      | 604  |       |
|                   |                        |      | >39 years                  | OR       | 0.94          | 0.79 | 1.11 |                   |              |                                  | 1874      | 251  |       |
|                   |                        |      | Per 1-year increase        | OR       | 0.97          | 0.96 | 0.98 |                   |              |                                  |           |      |       |
| Joanne Ryan       | ESPRIT                 | 2009 | Reproductive years         | OR       | 0.98          | 0.96 | 1.01 | cognitive decline | cohort       | France                           | 996       | NA   | 4.5   |
| Natalie L. Rasgon | HARMONY                | 2005 | Reproductive period, years |          |               |      |      | cognitive decline | case-control | US                               | 1111/4733 | 1111 | 6     |
|                   |                        |      | <35                        | OR       | 1.15          | 0.96 | 1.36 |                   |              |                                  | 1407      | 276  |       |
|                   |                        |      | 35–39 (ref.)               | OR       | 1.00          | 1.00 | 1.00 |                   |              |                                  | 2310      | 399  |       |
|                   |                        |      | >39                        | OR       | 0.82          | 0.66 | 1.00 |                   |              |                                  | 1136      | 157  |       |
| Fu-Dong Li        | ZPHS                   | 2015 | Reproductive period        | OR       | 0.97          | 0.96 | 0.99 | cognitive decline | case-control | CN                               | 4,796     | 919  | 7     |
| Hyesue Jang       | KLOSCAD +HELIAD        | 2018 | Reproductive period        | OR       | 0.99          | 0.95 | 1.04 | cognitive decline | case-control | Korea                            | 3,549     | 896  | 5.5   |
| Martin J. Prince  | 10/66 population-based | 2018 | Reproductive period        | HR       | 1.00          | 0.99 | 1.02 | dementia          | cohort       | Cuba, Dominican Republic, Puerto | 8466      | 692  | 5.5   |

|               |              |      |                              |    |      |      |      |          |        |                                      |           |         |   |
|---------------|--------------|------|------------------------------|----|------|------|------|----------|--------|--------------------------------------|-----------|---------|---|
|               | cohort study |      |                              |    |      |      |      |          |        | Rico, Venezuela, Mexico, Peru, China |           |         |   |
| Jung Eun Yoo  | NCSP         | 2020 | Duration of fertility, years |    |      |      |      | dementia | cohort | Korea                                | 4,696,633 | 212,227 | 7 |
|               |              |      | <30 (ref.)                   | HR | 1.00 | 1.00 | 1.00 |          |        |                                      | 584182    | 45,408  |   |
|               |              |      | 30-34                        | HR | 0.93 | 0.92 | 0.94 |          |        |                                      | 1831593   | 97,165  |   |
|               |              |      | 35-39                        | HR | 0.81 | 0.80 | 0.82 |          |        |                                      | 1916595   | 57,242  |   |
|               |              |      | ≥ 40                         | HR | 0.81 | 0.79 | 0.82 |          |        |                                      | 364263    | 12,412  |   |
| Paola Gilsanz | KPNC         | 2019 | Reproductive span, years     |    |      |      |      | dementia | cohort | US                                   | 6,137     | 2577    | 7 |
|               |              |      | <34.4 (mean)                 | HR | 1.2  | 1.08 | 1.32 |          |        |                                      | 1,702     |         |   |
|               |              |      | ≥34.4 (ref.)                 | HR | 1.00 | 1.00 | 1.00 |          |        |                                      | 2,345     |         |   |
|               |              |      | ≤20                          | HR | 1.55 | 1.03 | 2.32 |          |        |                                      | 52        |         |   |
|               |              |      | 21–30                        | HR | 1.26 | 1.08 | 1.49 |          |        |                                      | 687       |         |   |
|               |              |      | 31–34                        | HR | 1.26 | 1.09 | 1.47 |          |        |                                      | 963       |         |   |
|               |              |      | 35–36                        | HR | 1.02 | 0.87 | 1.19 |          |        |                                      | 784       |         |   |
|               |              |      | 37–38                        | HR | 1.16 | 1.00 | 1.34 |          |        |                                      | 822       |         |   |
|               |              |      | 39–44 (ref.)                 | HR | 1.00 | 1.00 | 1.00 |          |        |                                      | 739       |         |   |
| Paola Gilsanz | KPNC         | 2019 | Reproductive span, years     |    |      |      |      | dementia | cohort | US                                   | 6,137     | 2577    | 7 |
|               |              |      | <35.5 (mean)                 | HR | 1.18 | 1.06 | 1.31 |          |        |                                      | 1,298     |         |   |
|               |              |      | ≥35.5 (ref.)                 | HR | 1.00 | 1.00 | 1.00 |          |        |                                      | 1,893     |         |   |
|               |              |      | <34.4                        | HR | 1.27 | 1.13 | 1.42 |          |        |                                      | 1,012     |         |   |
|               |              |      | ≥34.4 (ref.)                 | HR | 1.00 | 1.00 | 1.00 |          |        |                                      | 2,179     |         |   |
|               |              |      | ≤20                          | HR | 1.61 | 0.97 | 2.67 |          |        |                                      | 26        |         |   |
|               |              |      | 21–30                        | HR | 1.41 | 1.17 | 1.70 |          |        |                                      | 359       |         |   |

|                     |                     |      |                            |    |      |      |      |          |        |             |         |     |     |    |
|---------------------|---------------------|------|----------------------------|----|------|------|------|----------|--------|-------------|---------|-----|-----|----|
|                     |                     |      | 31–34                      | HR | 1.31 | 1.12 | 1.54 |          |        |             | 627     |     |     |    |
|                     |                     |      | 35–36                      | HR | 1.04 | 0.89 | 1.23 |          |        |             | 656     |     |     |    |
|                     |                     |      | 37–38                      | HR | 1.16 | 1.00 | 1.35 |          |        |             | 785     |     |     |    |
|                     |                     |      | 39–44 (ref.)               | HR | 1.00 | 1.00 | 1.00 |          |        |             | 738     |     |     |    |
| Mirjam I. Geerlings | The Rotterdam Study | 2001 | Reproductive period, years |    |      |      |      | dementia | cohort | Netherlands | 3588    | 199 | 6.5 |    |
|                     |                     |      | ≤34 (ref.)                 | RR | 1.00 | 1.00 | 1.00 |          |        |             | 333     |     |     |    |
|                     |                     |      | 34-36                      | RR | 1.56 | 1.00 | 2.43 |          |        |             | 347     |     |     |    |
|                     |                     |      | 37-39                      | RR | 1.64 | 1.07 | 2.53 |          |        |             | 320     |     |     |    |
|                     |                     |      | ≥39                        | RR | 1.78 | 1.12 | 2.84 |          |        |             | 364     |     |     |    |
|                     |                     |      | Per y increase             | RR | 1.04 | 1.01 | 1.08 |          |        |             |         |     |     |    |
| Jenna Najjar        | PPSW                | 2020 | Reproductive period, years |    |      |      |      | dementia | cohort | Sweden      | 1364    | 291 | 7   |    |
|                     |                     |      | Q1: <32.6 years (ref.)     | HR | 1.00 | 1.00 | 1.00 |          |        |             | 333     |     |     |    |
|                     |                     |      | Q2: 33-35.7 years          | HR | 1.51 | 1.05 | 2.16 |          |        |             | 347     |     |     |    |
|                     |                     |      | Q3: 36-37.4 years          | HR | 1.69 | 1.17 | 2.44 |          |        |             | 320     |     |     |    |
|                     |                     |      | Q4: ≥38.0 years            | HR | 2.17 | 1.51 | 3.11 |          |        |             | 364     |     |     |    |
| A. Paganini-Hill    | The 90+ Study       | 2020 | Reproductive years         |    |      |      |      | dementia | cohort | US          | 424     | 209 | 5.5 |    |
|                     |                     |      | ≤32 (ref.)                 | HR | 1.00 | 1.00 | 1.00 |          |        |             | 130     |     |     | 63 |
|                     |                     |      | 33–38                      | HR | 1.06 | 0.76 | 1.47 |          |        |             | 150     |     |     | 81 |
|                     |                     |      | 39+                        | HR | 0.84 | 0.59 | 1.2  |          |        |             | 140     |     |     | 64 |
| Jessica Gong        | UK Biobank          | 2022 | Reproductive period, years |    |      |      |      | dementia | cohort | UK          | 273,240 |     | 6.5 |    |
|                     |                     |      | <33 (ref.)                 | HR | 1.00 | 1.00 | 1.00 |          |        |             |         | 186 |     |    |
|                     |                     |      | 33 to 35                   | HR | 0.98 | 0.84 | 1.15 |          |        |             |         | 178 |     |    |
|                     |                     |      | 36 to 37                   | HR | 0.78 | 0.67 | 0.92 |          |        |             |         | 166 |     |    |
|                     |                     |      | 38 to 39                   | HR | 0.67 | 0.57 | 0.79 |          |        |             |         | 160 |     |    |
|                     |                     |      | 40 to 42                   | HR | 0.68 | 0.58 | 0.79 |          |        |             |         | 192 |     |    |

|                     |                     |      |                              |    |      |      |      |    |              |             |           |         |     |
|---------------------|---------------------|------|------------------------------|----|------|------|------|----|--------------|-------------|-----------|---------|-----|
|                     |                     |      | >42                          | HR | 0.8  | 0.67 | 0.95 |    |              |             |           | 137     |     |
| Jung Eun Yoo        | NCSP                | 2020 | Duration of fertility, years |    |      |      |      | AD | cohort       | Korea       | 4,696,633 | 162,901 | 7   |
|                     |                     |      | <30 (ref.)                   | HR | 1.00 | 1.00 | 1.00 |    |              |             |           |         |     |
|                     |                     |      | 30-34                        | HR | 0.93 | 0.92 | 0.94 |    |              |             |           |         |     |
|                     |                     |      | 35-39                        | HR | 0.81 | 0.80 | 0.82 |    |              |             |           |         |     |
|                     |                     |      | ≥ 40                         | HR | 0.81 | 0.79 | 0.83 |    |              |             |           |         |     |
| Mirjam I. Geerlings | The Rotterdam Study | 2001 | Reproductive period, years   |    |      |      |      | AD | cohort       | Netherlands | 3588      | 186     | 6.5 |
|                     |                     |      | ≤34 (ref.)                   | RR | 1.00 | 1.00 | 1.00 |    |              |             |           | 155     |     |
|                     |                     |      | 34-36                        | RR | 1.32 | 0.81 | 2.14 |    |              |             |           |         |     |
|                     |                     |      | 37-39                        | RR | 1.41 | 0.88 | 2.25 |    |              |             |           |         |     |
|                     |                     |      | ≥39                          | RR | 1.51 | 0.91 | 2.5  |    |              |             |           |         |     |
|                     |                     |      | Per y increase               | RR | 1.03 | 1.00 | 1.07 |    |              |             |           |         |     |
| Jenna Najjar        | PPSW                | 2020 | Reproductive period, years   |    |      |      |      | AD | cohort       | Sweden      | 1364      | 146     | 7   |
|                     |                     |      | Q1: <32.6 (ref.)             | HR | 1.00 | 1.00 | 1.00 |    |              |             | 333       |         |     |
|                     |                     |      | Q2: 33-35.7                  | HR | 1.81 | 1.07 | 3.07 |    |              |             | 347       |         |     |
|                     |                     |      | Q3: 36-37.4                  | HR | 1.91 | 1.11 | 3.28 |    |              |             | 320       |         |     |
|                     |                     |      | Q4: ≥38.0                    | HR | 2.78 | 1.65 | 4.71 |    |              |             | 364       |         |     |
|                     |                     |      |                              |    |      |      |      |    |              |             |           |         |     |
| Hyesue Jang         | KLOSCAD , HELIAD    | 2018 | Reproductive period          | OR | 0.97 | 0.86 | 1.09 | AD | case-control | Korea       | 3549      | 118     | 5.5 |

f) Characteristics of studies with cognitive decline, dementia, and AD by age at first birth.

| Author           | Project           | Year | Description of risk factor         | RR/OR/<br>HR | Adjusted<br>risk | LCI  | UCI  | Outcome              | design | Country                         | Sample | Case | Score |
|------------------|-------------------|------|------------------------------------|--------------|------------------|------|------|----------------------|--------|---------------------------------|--------|------|-------|
| Yoko Shimizu     | JPHC Study        | 2019 | Age at first birth, years          |              |                  |      |      | cognitive<br>decline | cohort | Japan                           | 670    | 196  | 7.5   |
|                  |                   |      | ≤ 22 (ref.)                        | OR           | 1.00             | 1.00 | 1.00 |                      |        |                                 | 44     | 19   |       |
|                  |                   |      | 23-25                              | OR           | 0.78             | 0.40 | 1.52 |                      |        |                                 | 290    | 99   |       |
|                  |                   |      | ≥ 26                               | OR           | 0.69             | 0.35 | 1.35 |                      |        |                                 | 284    | 94   |       |
| Xingyue Song     | SCHS              | 2020 | Age at first livebirth, years      |              |                  |      |      | cognitive<br>decline | cohort | Singapore                       | 8222   | 1332 | 7.5   |
|                  |                   |      | <20 (ref.)                         | OR           | 1.00             | 1.00 | 1.00 |                      |        |                                 | 1180   | 249  |       |
|                  |                   |      | 21-25                              | OR           | 1.06             | 0.88 | 1.28 |                      |        |                                 | 3001   | 534  |       |
|                  |                   |      | 26-30                              | OR           | 0.92             | 0.74 | 1.15 |                      |        |                                 | 2465   | 338  |       |
|                  |                   |      | >30                                | OR           | 0.85             | 0.64 | 1.13 |                      |        |                                 | 945    | 125  |       |
|                  |                   |      | Per 5-year increase                | OR           | 0.94             | 0.86 | 1.02 |                      |        |                                 |        |      |       |
| Joanne Ryan      | ESPRIT            | 2009 | Age at birth of first child, years |              |                  |      |      | cognitive<br>decline | cohort | France                          | 996    | NA   | 4.5   |
|                  |                   |      | <20 (ref.)                         | OR           | 1.00             | 1.00 | 1.00 |                      |        |                                 |        |      |       |
|                  |                   |      | 21-29                              | OR           | 0.75             | 0.48 | 1.17 |                      |        |                                 |        |      |       |
|                  |                   |      | >30                                | OR           | 0.91             | 0.54 | 1.54 |                      |        |                                 |        |      |       |
| A. Paganini-Hill | The 90+<br>Study  | 2020 | Age at first child, years          |              |                  |      |      | dementia             | cohort | US                              | 424    | 209  | 5.5   |
|                  |                   |      | ≤20 (ref.)                         | HR           | 1.00             | 1.00 | 1.00 |                      |        |                                 | 11     | 20   |       |
|                  |                   |      | 21-24                              | HR           | 0.88             | 0.51 | 1.51 |                      |        |                                 | 46     | 40   |       |
|                  |                   |      | 25-29                              | HR           | 1.06             | 0.63 | 1.77 |                      |        |                                 | 55     | 65   |       |
|                  |                   |      | 30+                                | HR           | 0.63             | 0.35 | 1.15 |                      |        |                                 | 34     | 26   |       |
| Martin J. Prince | 10/66 population- | 2018 | Age at birth of first child        | HR           | 0.99             | 0.98 | 1.01 | dementia             | cohort | Cuba,<br>Dominican<br>Republic, | 8466   | 692  | 5.5   |

|                |                    |      |                                |    |      |      |          |          |        |                                             |       |       |      |     |
|----------------|--------------------|------|--------------------------------|----|------|------|----------|----------|--------|---------------------------------------------|-------|-------|------|-----|
|                | based cohort study |      |                                |    |      |      |          |          |        | Puerto Rico, Venezuela, Mexico, Peru, China |       |       |      |     |
| Jessica Gong   | UK Biobank         | 2022 | Age at first live birth, years |    |      |      | dementia | cohort   | UK     | 273,240                                     |       | 6.5   |      |     |
|                |                    |      | <21                            | HR | 1.43 | 1.26 |          |          |        |                                             |       |       | 1.62 | 305 |
|                |                    |      | 21 to 22                       | HR | 1.23 | 1.08 |          |          |        |                                             |       |       | 1.4  | 270 |
|                |                    |      | 23 to 24                       | HR | 1.26 | 1.12 |          |          |        |                                             |       |       | 1.42 | 302 |
|                |                    |      | 25 to 26 (ref.)                | HR | 1.00 | 1.00 |          |          |        |                                             |       |       | 1.00 | 217 |
|                |                    |      | 27 to 29                       | HR | 1.16 | 1.02 |          |          |        |                                             |       |       | 1.32 | 251 |
|                |                    |      | >29                            | HR | 1.11 | 0.96 |          |          |        |                                             |       |       | 1.29 | 213 |
|                |                    |      | Per additional year of age     | HR | 0.98 | 0.97 |          |          |        |                                             |       |       | 1.00 |     |
| Alison Gemmill | HRS                | 2022 | Younger age at first birth     | HR | 1.11 | 0.96 | 1.27     | dementia | cohort | US                                          | 8,875 | 2,030 | 5    |     |

g) Characteristics of studies with cognitive decline, dementia, and AD by parity.

| Author            | Project    | Year | Description of risk factor | RR/OR/HR | Adjusted risk | LCI  | UCI               | Outcome           | design    | Country | Sample | Case | Score |
|-------------------|------------|------|----------------------------|----------|---------------|------|-------------------|-------------------|-----------|---------|--------|------|-------|
| Yoko Shimizu      | JPHC Study | 2019 | Number of births           |          |               |      | cognitive decline | cohort            | Japan     | 670     | 196    | 7.5  |       |
|                   |            |      | 1 (ref.)                   | OR       | 1.00          | 1.00 |                   |                   |           | 1.00    | 29     |      | 9     |
|                   |            |      | 2                          | OR       | 1.19          | 0.50 |                   |                   |           | 2.79    | 228    |      | 87    |
|                   |            |      | 3                          | OR       | 0.83          | 0.35 |                   |                   |           | 1.94    | 282    |      | 87    |
|                   |            |      | ≥ 4                        | OR       | 1.03          | 0.41 |                   |                   |           | 2.63    | 83     |      | 31    |
| Xingyue Song      | SCHS       | 2020 | Number of children         |          |               |      | cognitive decline | cohort            | Singapore | 8222    | 1332   | 7.5  |       |
|                   |            |      | 0                          | OR       | 1.02          | 0.70 |                   |                   |           | 1.48    | 624    |      | 84    |
|                   |            |      | 1–2 (ref.)                 | OR       | 1.00          | 1.00 |                   |                   |           | 1.00    | 2586   |      | 324   |
|                   |            |      | 3–4                        | OR       | 1.04          | 0.88 |                   |                   |           | 1.25    | 3457   |      | 495   |
|                   |            |      | 5                          | OR       | 1.27          | 1.04 |                   |                   |           | 1.55    | 1555   |      | 429   |
|                   |            |      | Per 1 increase             | OR       | 1.05          | 1.01 |                   |                   |           | 1.09    |        |      |       |
| Joanne Ryan       | ESPRIT     | 2009 | Nulliparous                | OR       | 0.93          | 0.56 | 1.52              | cognitive decline | cohort    | France  | 996    | NA   | 4.5   |
| Joanne Ryan       | ESPRIT     | 2009 | Number of children         |          |               |      | cognitive decline | cohort            | France    | 996     | NA     | 4.5  |       |
|                   |            |      | 0 (ref.)                   | OR       | 1.00          | 1.00 |                   |                   |           |         |        |      | 1.00  |
|                   |            |      | 1                          | OR       | 1.52          | 0.82 |                   |                   |           |         |        |      | 2.81  |
|                   |            |      | 2 or 3                     | OR       | 1.23          | 0.72 |                   |                   |           |         |        |      | 2.71  |
|                   |            |      | >3                         | OR       | 1.10          | 0.58 |                   |                   |           |         |        |      | 2.08  |
| Natalie L. Rasgon | HARMONY    | 2005 | Parity                     |          |               |      | cognitive decline | case-control      | US        | 5844    | 1111   | 6    |       |
|                   |            |      | 0                          | OR       | 1.09          | 0.90 |                   |                   |           | 1.31    | 783    |      | 194   |
|                   |            |      | 1–2 (ref.)                 | OR       | 1.00          | 1.00 |                   |                   |           | 1.00    | 2529   |      | 546   |
|                   |            |      | 3–4                        | OR       | 1.14          | 0.97 |                   |                   |           | 1.34    | 1223   |      | 298   |

|                  |                                     |      |                                            |    |      |      |      |                   |               |                                                                       |           |         |     |      |
|------------------|-------------------------------------|------|--------------------------------------------|----|------|------|------|-------------------|---------------|-----------------------------------------------------------------------|-----------|---------|-----|------|
|                  |                                     |      | ≥5                                         | OR | 1.59 | 1.18 | 2.13 |                   |               |                                                                       | 198       | 73      |     |      |
| Fu-Dong Li       | ZPHS                                | 2015 | Number of full-term pregnancies            |    |      |      |      | cognitive decline | retrospective | CN                                                                    | 4,796     | 919     | 7   |      |
|                  |                                     |      | 0                                          | OR | 1.03 | 0.54 | 1.94 |                   |               |                                                                       |           |         |     |      |
|                  |                                     |      | 1–4 (ref.)                                 | OR | 1.00 | 1.00 | 1.00 |                   |               |                                                                       |           |         |     |      |
|                  |                                     |      | ≥5                                         | OR | 1.36 | 1.13 | 1.63 |                   |               |                                                                       |           |         |     |      |
| Hyesue Jang      | HELIAD                              | 2018 | No. of completed pregnancy with childbirth |    |      |      |      | cognitive decline | retrospective | Korea                                                                 | 812       | NA      | 5.5 |      |
|                  |                                     |      | 0                                          | OR | 1.74 | 0.76 | 4.03 |                   |               |                                                                       |           |         |     |      |
|                  |                                     |      | 1 (ref.)                                   | OR | 1.00 | 1.00 | 1.00 |                   |               |                                                                       |           |         |     |      |
|                  |                                     |      | ≥2                                         | OR | 0.99 | 0.64 | 1.53 |                   |               |                                                                       |           |         |     |      |
| Hyesue Jang      | KLOSCAD                             | 2018 | No. of completed pregnancy with childbirth |    |      |      |      | cognitive decline | retrospective | Korea                                                                 | 2737      | NA      | 5.5 |      |
|                  |                                     |      | 0                                          | OR | 1.74 | 0.76 | 4.01 |                   |               |                                                                       |           |         |     |      |
|                  |                                     |      | 1 (ref.)                                   | OR | 1.00 | 1.00 | 1.00 |                   |               |                                                                       |           |         |     |      |
|                  |                                     |      | 2–4                                        | OR | 0.96 | 0.62 | 1.49 |                   |               |                                                                       |           |         |     |      |
|                  |                                     |      | ≥5                                         | OR | 1.07 | 0.67 | 1.69 |                   |               |                                                                       |           |         |     |      |
| Martin J. Prince | 10/66 population-based cohort study | 2018 | Parity (per child)                         | HR | 1.03 | 1.00 | 1.06 | dementia          | cohort        | Cuba, Dominican Republic, Puerto Rico, Venezuela, Mexico, Peru, China | 8466      | 692     | 5.5 |      |
|                  |                                     |      | Nulliparity                                | HR | 1.16 | 0.86 | 1.56 |                   |               |                                                                       |           |         |     |      |
| Jung Eun Yoo     | NCSP                                | 2020 | Parity                                     |    |      |      |      | dementia          | cohort        | Korea                                                                 | 4,696,633 | 212,227 | 7   |      |
|                  |                                     |      | Nulliparity (ref.)                         |    | HR   | 1.00 | 1.00 |                   |               |                                                                       | 1.00      | 103,671 |     | 2670 |
|                  |                                     |      | 1                                          | HR | 0.89 | 0.85 | 0.94 |                   |               |                                                                       | 363,216   | 6146    |     |      |



|                  |               |      |                         |    |      |      |      |          |        |                  |           |        |     |
|------------------|---------------|------|-------------------------|----|------|------|------|----------|--------|------------------|-----------|--------|-----|
|                  |               |      | ≥ 2                     | HR | 1.04 | 0.99 | 1.08 |          |        |                  | 4,229,746 | 203411 |     |
| Jenna Najjar     | PPSW          | 2020 | Pregnancies (number)    | HR | 0.97 | 0.87 | 1.07 | dementia | cohort | Sweden           | 1364      | 291    | 7   |
| A. Paganini-Hill | The 90+ Study | 2020 | Number of children      |    |      |      |      | dementia | cohort | US               | 424       | 209    | 5.5 |
|                  |               |      | 0                       | HR | 1.00 | 1.00 | 1.00 |          |        |                  | 118       | 52     |     |
|                  |               |      | 1 (ref.)                | HR | 0.98 | 0.64 | 1.52 |          |        |                  | 62        | 34     |     |
|                  |               |      | 2                       | HR | 1.23 | 0.86 | 1.75 |          |        |                  | 152       | 76     |     |
|                  |               |      | 3+                      | HR | 1.18 | 0.79 | 1.76 |          |        |                  | 87        | 45     |     |
| Jong Bin Bae     | COSMIC        | 2020 | 0 (nulliparity)         | OR | 0.92 | 0.67 | 1.27 | dementia | cohort | Multiple Regions | 1368      | 84     | 5.5 |
|                  |               |      | 1 (ref.)                | OR | 1.00 | 1.00 | 1.00 |          |        |                  | 2096      | 103    |     |
|                  |               |      | 2                       | OR | 1.13 | 0.86 | 1.47 |          |        |                  | 3923      | 181    |     |
|                  |               |      | 3                       | OR | 1.19 | 0.91 | 1.57 |          |        |                  | 2819      | 161    |     |
|                  |               |      | 4                       | OR | 1.07 | 0.79 | 1.45 |          |        |                  | 1652      | 103    |     |
|                  |               |      | ≥ 5 (grand multiparity) | OR | 1.47 | 1.10 | 1.94 |          |        |                  | 2061      | 241    |     |
|                  |               |      | 5 to 9                  | OR | 1.44 | 1.08 | 1.90 |          |        |                  | 1836      | 212    |     |
|                  |               |      | ≥ 10                    | OR | 1.86 | 1.11 | 3.09 |          |        |                  | 225       | 29     |     |
| Jessica Gong     | UK Biobank    | 2022 | Number of live births   |    |      |      |      | dementia | cohort | UK               | 273,240   |        | 6.5 |
|                  |               |      | 0                       | HR | 1.18 | 1.04 | 1.33 |          |        |                  |           | 284    |     |
|                  |               |      | 1                       | HR | 1.09 | 0.95 | 1.25 |          |        |                  |           | 218    |     |
|                  |               |      | 2 (ref.)                | HR | 1.00 | 1.00 | 1.00 |          |        |                  |           | 773    |     |
|                  |               |      | 3                       | HR | 1.03 | 0.93 | 1.15 |          |        |                  |           | 392    |     |
|                  |               |      | 4 or more               | HR | 1.14 | 0.98 | 1.33 |          |        |                  |           | 190    |     |
| Alison Gemmill   | HRS           | 2022 | Parity                  |    |      |      |      | dementia | cohort | US               | 8,875     | 2,030  | 5   |
|                  |               |      | 0 (ref.)                | HR | 1.00 | 1.00 | 1.00 |          |        |                  |           |        |     |
|                  |               |      | 1                       | HR | 0.96 | 0.78 | 1.18 |          |        |                  |           |        |     |
|                  |               |      | 2                       | HR | 1.12 | 0.95 | 1.33 |          |        |                  |           |        |     |

|              |         |      |                                            |    |      |      |      |    |              |        |           |         |     |       |
|--------------|---------|------|--------------------------------------------|----|------|------|------|----|--------------|--------|-----------|---------|-----|-------|
|              |         |      | 3                                          | HR | 0.98 | 0.82 | 1.17 |    |              |        |           |         |     |       |
|              |         |      | >=4                                        | HR | 1.09 | 0.92 | 1.28 |    |              |        |           |         |     |       |
| Jung Eun Yoo | NCSP    | 2020 | Parity                                     |    |      |      |      | AD | cohort       | Korea  | 4,696,633 | 162,901 | 7   |       |
|              |         |      | Nulliparity(ref.)                          |    | HR   | 1.00 | 1.00 |    |              |        |           |         |     | 1.00  |
|              |         |      | 1                                          |    | HR   | 0.91 | 0.86 |    |              |        |           |         |     | 0.96  |
|              |         |      | ≥ 2                                        |    | HR   | 1.05 | 1.00 |    |              |        |           |         |     | 1.10  |
| Jenna Najjar | PPSW    | 2020 | Pregnancies (number)                       | HR | 0.96 | 0.84 | 1.11 | AD | cohort       | Sweden | 1364      | 146     | 7   |       |
| Hyesue Jang  | KLOSCAD | 2018 | No. of completed pregnancy with childbirth |    |      |      |      | AD | case-control | Korea  | 2,737     | NA      | 5.5 |       |
|              |         |      | 0                                          |    | OR   | 3.09 | 0.47 |    |              |        |           |         |     | 20.37 |
|              |         |      | 1 (ref.)                                   |    | OR   | 1.00 | 1.00 |    |              |        |           |         |     | 1.00  |
|              |         |      | 2-4                                        |    | OR   | 1.54 | 0.42 |    |              |        |           |         |     | 5.64  |
|              |         |      | ≥5                                         |    | OR   | 2.54 | 0.70 |    |              |        |           |         |     | 9.26  |
| Hyesue Jang  | HELIAD  | 2018 | No. of completed pregnancy with childbirth |    |      |      |      | AD | case-control | Korea  | 812       | NA      | 5.5 |       |
|              |         |      | 0                                          |    | OR   | 5.02 | 0.38 |    |              |        |           |         |     | 66.07 |
|              |         |      | 1 (ref.)                                   |    | OR   | 1.00 | 1.00 |    |              |        |           |         |     | 1.00  |
|              |         |      | ≥2                                         |    | OR   | 2.58 | 0.28 |    |              |        |           |         |     | 23.73 |

h) Characteristics of studies with cognitive decline, dementia, and AD by miscarriage and stillbirth.

| Author       | Project    | Year | Description of risk factor                     | RR/OR/<br>HR | Adjusted<br>risk | LCI  | UCI  | Outcome              | design           | Country | Sample  | Case | Score |       |
|--------------|------------|------|------------------------------------------------|--------------|------------------|------|------|----------------------|------------------|---------|---------|------|-------|-------|
| Hyesue Jang  | KLOSCAD    | 2018 | No. of incomplete pregnancy without childbirth |              |                  |      |      | cognitive<br>decline | case-<br>control | Korea   | 2,737   | NA   | 5.5   |       |
|              |            |      | 0 (ref.)                                       | OR           | 1.00             | 1.00 | 1.00 |                      |                  |         |         |      |       |       |
|              |            |      | 1                                              | OR           | 1.02             | 0.81 | 1.29 |                      |                  |         |         |      |       |       |
|              |            |      | ≥2                                             | OR           | 1.02             | 0.83 | 1.26 |                      |                  |         |         |      |       |       |
| Hyesue Jang  | HELIAD     | 2018 | No. of incomplete pregnancy without childbirth |              |                  |      |      | cognitive<br>decline | case-<br>control | Korea   | 812     | NA   | 5.5   |       |
|              |            |      | 0 (ref.)                                       | OR           | 1.00             | 1.00 | 1.00 |                      |                  |         |         |      |       |       |
|              |            |      | 1                                              | OR           | 1.02             | 0.81 | 1.29 |                      |                  |         |         |      |       |       |
|              |            |      | ≥2                                             | OR           | 1.02             | 0.82 | 1.26 |                      |                  |         |         |      |       |       |
| Fu-Dong Li   | ZPHS       | 2015 | Number of incomplete pregnancies               |              |                  |      |      | cognitive<br>decline | case-<br>control | CN      | 4,796   | 919  | 7     |       |
|              |            |      | 0                                              | OR           | 1.22             | 1.00 | 1.45 |                      |                  |         |         |      |       |       |
|              |            |      | 1–2 (ref.)                                     | OR           | 1.00             | 1.00 | 1.00 |                      |                  |         |         |      |       |       |
|              |            |      | ≥3                                             | OR           | 1.34             | 0.86 | 2.11 |                      |                  |         |         |      |       |       |
| Saima Basit, | NA         | 2019 | Stillbirth                                     | HR           | 1.71             | 1.18 | 2.50 | dementia             | cohort           | Denmark | 1243957 | 28   | 6     |       |
|              |            |      | ≥2 miscarriages                                | HR           | 1.06             | 0.84 | 1.36 |                      |                  |         |         | 74   |       |       |
|              |            |      | 1 miscarriage                                  | HR           | 0.98             | 0.86 | 1.11 |                      |                  |         |         | 402  |       |       |
|              |            |      | No pregnancy loss (ref.)                       | HR           | 1.00             | 1.00 | 1.00 |                      |                  |         |         | 1684 |       |       |
| Jessica Gong | UK Biobank | 2022 | Number of miscarriages                         |              |                  |      |      | dementia             | cohort           | UK      | 273,240 | -    | 6     |       |
|              |            |      | 0 (ref.)                                       | HR           | 1.00             | 1.00 | 1.00 |                      |                  |         |         |      |       | 1,220 |
|              |            |      | 1                                              | HR           | 0.90             | 0.78 | 1.03 |                      |                  |         |         |      |       | 249   |
|              |            |      | 2 or more                                      | HR           | 1.02             | 0.83 | 1.25 |                      |                  |         |         |      |       | 106   |
|              |            |      | Miscarriage versus not                         | HR           | 0.93             | 0.82 | 1.06 |                      |                  |         |         |      |       | 355   |
|              |            |      | Per miscarriage                                | HR           | 1.01             | 0.94 | 1.08 |                      |                  |         |         |      |       | -     |

|               |            |      |                                                |    |      |      |      |          |              |         |         |       |     |
|---------------|------------|------|------------------------------------------------|----|------|------|------|----------|--------------|---------|---------|-------|-----|
| Ellika Andolf | n.a.       | 2020 | Recurrent miscarriages                         | HR | 0.94 | 0.54 | 1.61 | dementia | cohort       | Sweden  | 1128709 | 6,488 | 5.5 |
| Hyesue Jang   | KLOSCAD    | 2018 | No. of incomplete pregnancy without childbirth |    |      |      |      | AD       | case-control | Korea   | 2,737   | NA    | 5.5 |
|               |            |      | 0 (ref.)                                       | OR | 1.00 | 1.00 | 1.00 |          |              |         |         |       |     |
|               |            |      | 1                                              | OR | 0.45 | 0.24 | 0.84 |          |              |         |         |       |     |
|               |            |      | ≥2                                             | OR | 0.68 | 0.39 | 1.16 |          |              |         |         |       |     |
| Hyesue Jang   | HELIAD     | 2018 | No. of incomplete pregnancy without childbirth |    |      |      |      | AD       | case-control | Korea   | 812     | NA    | 5.5 |
|               |            |      | 0 (ref.)                                       | OR | 1.00 | 1.00 | 1.00 |          |              |         |         |       |     |
|               |            |      | 1                                              | OR | 0.27 | 0.05 | 1.39 |          |              |         |         |       |     |
|               |            |      | ≥2                                             | OR | 0.18 | 0.04 | 0.86 |          |              |         |         |       |     |
| Saima Basit   | NA         | 2019 | Stillbirth                                     | HR | 1.61 | 0.86 | 3.01 | AD       | cohort       | Denmark | 1243957 | 10    | 6   |
|               |            |      | ≥2 miscarriages                                | HR | 1.20 | 0.84 | 1.71 |          |              |         |         | 33    |     |
|               |            |      | 1 miscarriage                                  | HR | 0.95 | 0.77 | 1.16 |          |              |         |         | 163   |     |
|               |            |      | No loss (ref.)                                 | HR | 1.00 | 1.00 | 1.00 |          |              |         |         | 720   |     |
| Jessica Gong  | UK Biobank | 2022 | Number of stillbirths                          |    |      |      |      | AD       | cohort       | UK      | 273,240 |       | 6   |
|               |            |      | 0 (ref.)                                       | HR | 1.00 | 1.00 | 1.00 |          |              |         |         |       |     |
|               |            |      | 1                                              | HR | 1.15 | 0.88 | 1.49 |          |              |         |         |       |     |
|               |            |      | 2 or more                                      | HR | 1.27 | 0.66 | 2.45 |          |              |         |         |       |     |
|               |            |      | Stillbirth versus not                          | HR | 1.16 | 0.91 | 1.49 |          |              |         |         |       |     |
|               |            |      | Per stillbirth                                 | HR | 1.10 | 0.92 | 1.31 |          |              |         |         |       |     |
|               |            |      |                                                |    |      |      |      |          |              |         | 1,503   |       |     |
|               |            |      |                                                |    |      |      |      |          |              |         |         | 65    |     |
|               |            |      |                                                |    |      |      |      |          |              |         |         | 12    |     |
|               |            |      |                                                |    |      |      |      |          |              |         |         | 77    |     |
|               |            |      |                                                |    |      |      |      |          |              |         |         | -     |     |

i) Characteristics of studies with cognitive decline, dementia, and AD by breastfeeding.

| Author          | Project    | Year | Description of risk factor         | RR/OR/<br>HR | Adjusted<br>risk | LCI  | UCI  | Outcome              | design           | Country | Sample    | Case    | Score |
|-----------------|------------|------|------------------------------------|--------------|------------------|------|------|----------------------|------------------|---------|-----------|---------|-------|
| fu-Dong Li      | ZAHCS      | 2020 | Mean breastfeeding duration, month |              |                  |      |      | cognitive<br>decline | cohort           | CN      | 5487      | 1053    | 7     |
|                 |            |      | <6                                 | OR           | 1.50             | 1.20 | 1.88 |                      |                  |         |           |         |       |
|                 |            |      | 6-12                               | OR           | 1.58             | 1.29 | 1.93 |                      |                  |         |           |         |       |
|                 |            |      | 12 (ref.)                          | OR           | 1.00             | 1.00 | 1.00 |                      |                  |         |           |         |       |
|                 |            |      | 12–18                              | OR           | 1.33             | 1.06 | 1.68 |                      |                  |         |           |         |       |
| 18              | OR         | 2.08 | 1.64                               | 2.65         |                  |      |      |                      |                  |         |           |         |       |
| Hyesue Jang     | HELIAD     | 2018 | Breastfed                          | OR           | 0.93             | 0.66 | 1.33 | cognitive<br>decline | case-<br>control | Korea   | 812       | NA      | 5.5   |
| Yoko<br>Shimizu | JPHC Study | 2019 | Breastfeeding                      |              |                  |      |      | cognitive<br>decline | cohort           | Japan   | 670       | 196     | 7.5   |
|                 |            |      | Never (ref.)                       | OR           | 1.00             | 1.00 | 1.00 |                      |                  |         | 65        | 27      |       |
|                 |            |      | Ever                               | OR           | 0.67             | 0.38 | 1.16 |                      |                  |         | 555       | 186     |       |
| Jung Eun Yoo    | NCSP       | 2020 | Duration of breast feeding months  |              |                  |      |      | dementia             | cohort           | Korea   | 4,696,633 | 212,227 | 7     |
|                 |            |      | Never (ref.)                       | HR           | 1.00             | 1.00 | 1.00 |                      |                  |         | 383,752   | 6,825   |       |
|                 |            |      | < 6                                | HR           | 0.92             | 0.88 | 0.95 |                      |                  |         | 379,887   | 5,279   |       |
|                 |            |      | 6 —12                              | HR           | 1.04             | 1.01 | 1.07 |                      |                  |         | 838,259   | 23,046  |       |
|                 |            |      | ≥ 12                               | HR           | 1.14             | 1.11 | 1.17 |                      |                  |         | 3,094,735 | 177,077 |       |
| Jenna Najar     | PPSW       | 2020 | Breastfeeding, months              | HR           | 1.00             | 0.98 | 1.01 | dementia             | cohort           | Sweden  | 1364      | 291     | 7     |
| Jung Eun Yoo    | NCSP       | 2020 | Duration of breast feeding months  |              |                  |      |      | AD                   | cohort           | Korea   | 4,696,633 | 162,901 | 7     |
|                 |            |      | Never (ref.)                       | HR           | 1.00             | 1.00 | 1.00 |                      |                  |         |           |         |       |
|                 |            |      | < 6                                | HR           | 0.89             | 0.86 | 0.93 |                      |                  |         |           |         |       |
|                 |            |      | 6—12                               | HR           | 1.02             | 0.98 | 1.05 |                      |                  |         |           |         |       |
|                 |            |      | ≥ 12                               | HR           | 1.11             | 1.08 | 1.15 |                      |                  |         |           |         |       |

|              |        |      |                       |    |      |      |      |    |              |        |      |     |     |
|--------------|--------|------|-----------------------|----|------|------|------|----|--------------|--------|------|-----|-----|
| Jenna Najjar | PPSW   | 2020 | Breastfeeding, months | HR | 0.99 | 0.97 | 1.02 | AD | cohort       | Sweden | 1364 | 146 | 7   |
| Hyesue Jang  | HELIAD | 2018 | Breastfed             | OR | 0.83 | 0.3  | 2.32 | AD | case-control | Korea  | 812  | NA  | 5.5 |

2. Characteristics of studies with cognitive decline, dementia, and AD by gynecologic surgery.

a) Characteristics of studies with cognitive decline, dementia, and AD by surgical menopause.

| Author              | Project         | Year | Description of risk factor | RR/OR/<br>HR | Adjusted<br>risk | LCI  | UCI  | Outcome           | design | Country     | Sample | Case | Score |
|---------------------|-----------------|------|----------------------------|--------------|------------------|------|------|-------------------|--------|-------------|--------|------|-------|
| Yoko Shimizu        | JPHC Study      | 2019 | Menopausal type            |              |                  |      |      | cognitive decline | cohort | Japan       | 670    | 196  | 7.5   |
|                     |                 |      | Natural menopause (ref.)   | OR           | 1.00             | 1.00 | 1.00 |                   |        |             | 507    | 186  |       |
|                     |                 |      | Surgical menopause         | OR           | 0.89             | 0.53 | 1.49 |                   |        |             | 79     | 27   |       |
| Joanne Ryan         | ESPRIT          | 2009 | Surgical menopause         | OR           | 0.95             | 0.63 | 1.45 | cognitive decline | cohort | France      | 996    | NA   | 4.5   |
| J Ryan              | TCS             | 2014 | Type of menopause          |              |                  |      |      | cognitive decline | cohort | France      | 4868   | NA   | 7     |
|                     |                 |      | Natural Surgical (ref.)    | HR           | 1.00             | 1.00 | 1.00 |                   |        |             |        |      |       |
|                     |                 |      | Surgical menopause         | HR           | 1.13             | 0.90 | 1.43 |                   |        |             |        |      |       |
| J Ryan              | TCS             | 2014 | Type of menopause          |              |                  |      |      | dementia          | cohort | France      | 4868   | 393  | 7     |
|                     |                 |      | Natural Surgical (ref.)    | HR           | 1.00             | 1.00 | 1.00 |                   |        |             |        |      |       |
|                     |                 |      | Surgical menopause         | HR           | 0.83             | 0.51 | 1.36 |                   |        |             |        |      |       |
| A. Paganini-Hill    | The 90+ Study   | 2020 | Menopause                  |              |                  |      |      | dementia          | cohort | US          | 424    | 209  | 5.5   |
|                     |                 |      | Natural (ref.)             | HR           | 1.00             | 1.00 | 1.00 |                   |        |             | 271    | 132  |       |
|                     |                 |      | Surgical                   | HR           | 1.14             | 0.85 | 1.51 |                   |        |             | 151    | 77   |       |
| Mirjam Geerlings I. | Rotterdam Study | 2001 | Artificial menopause       | RR           | 1.17             | 0.72 | 1.89 | dementia          | cohort | Netherlands | 3588   | 199  | 6.5   |
| Mirjam Geerlings I. | Rotterdam Study | 2001 | Artificial menopause       | RR           | 0.95             | 0.56 | 1.63 | AD                | cohort | Netherlands | 3588   | 155  | 6.5   |

b) Characteristics of studies with cognitive decline, dementia, and AD by oophorectomy, hysterectomy, and hysterectomy with bilateral oophorectomy.

| Author                  | Project                | Year | Description of risk factor                       | RR/OR/<br>HR | Adjusted<br>risk | LCI  | UCI  | Outcome              | design           | Country | Sample             | Case | Score |        |
|-------------------------|------------------------|------|--------------------------------------------------|--------------|------------------|------|------|----------------------|------------------|---------|--------------------|------|-------|--------|
| W.A. Rocca              | MCOSOA                 | 2007 | Unilateral oophorectomy                          |              |                  |      |      | cognitive<br>decline | cohort           | US      | 2961               |      | 7     |        |
|                         |                        |      | Referent women (ref.)                            | HR           | 1.00             | 1.00 | 1.00 |                      |                  |         |                    |      |       | 98     |
|                         |                        |      | Unilateral oophorectomy                          | HR           | 1.64             | 1.2  | 2.23 |                      |                  |         |                    |      |       | 76     |
| Thien Kieu<br>Thi Phung | DCRS                   | 2010 | Unilateral oophorectomy                          |              |                  |      |      | dementia             | cohort           | Denmark | 2,313,388          |      | 5     |        |
|                         |                        |      | Yes                                              | RR           | 0.99             | 0.92 | 1.07 |                      |                  |         |                    |      |       | 766    |
|                         |                        |      | No (ref.)                                        | RR           | 1.00             | 1.00 | 1.00 |                      |                  |         |                    |      |       | 94,473 |
| W.A. Rocca              | MCOSOA                 | 2007 | Bilateral oophorectomy                           |              |                  |      |      | cognitive<br>decline | cohort           | US      | 2961               |      | 7     |        |
|                         |                        |      | Referent women                                   | HR           | 1.00             | 1.00 | 1.00 |                      |                  |         |                    |      |       | 98     |
|                         |                        |      | Bilateral oophorectomy                           | HR           | 1.33             | 0.98 | 1.81 |                      |                  |         |                    |      |       | 74     |
| W.A. Rocca              | MCOSOA                 | 2007 | Overall                                          |              |                  |      |      | cognitive<br>decline | cohort           | US      | 2961               |      | 7     |        |
|                         |                        |      | Referent women                                   | OR           | 1.00             | 1.00 | 1.00 |                      |                  |         |                    |      |       | 98     |
|                         |                        |      | Any oophorectomy                                 | OR           | 1.46             | 1.13 | 1.90 |                      |                  |         |                    |      |       | 150    |
| C. S. Uldbjerg          | Danish Nurse<br>Cohort | 2022 | Bilateral oophorectomy                           | RR           | 1.18             | 0.89 | 1.56 | dementia             | cohort           | Danish  | 24,851             | 1238 | 5     |        |
|                         |                        |      | Unilateral oophorectomy                          | RR           | 0.87             | 0.59 | 1.23 |                      |                  |         |                    |      |       |        |
| Thien Kieu<br>Thi Phung | DCRS                   | 2010 | Bilateral oophorectomy                           |              |                  |      |      | dementia             | cohort           | Denmark | 2,313,388          |      | 5     |        |
|                         |                        |      | Yes                                              | RR           | 1.07             | 1.01 | 1.14 |                      |                  |         |                    |      |       | 2,248  |
|                         |                        |      | No (ref.)                                        | RR           | 1.00             | 1.00 | 1.00 |                      |                  |         |                    |      |       | 92,991 |
| A. Paganini-<br>Hill    | The 90+<br>Study       | 2020 | Bilateral oophorectomy                           | HR           | 1.14             | 0.75 | 1.72 | dementia             | cohort           | US      | 424                | 209  | 5.5   |        |
| Bushra Imtiaz           | NA                     | 2014 | Oophorectomy (No history of malignant neoplasms) |              |                  |      |      | AD                   | case-<br>control | Finland | 19,043 /<br>19,043 | NA   | 6.5   |        |
|                         |                        |      | No (ref.)                                        | OR           | 1.00             | 1.00 | 1.00 |                      |                  |         |                    |      |       |        |
|                         |                        |      | Yes                                              | OR           | 0.85             | 0.75 | 0.97 |                      |                  |         |                    |      |       |        |



|                      |               |      |                                                                           |    |      |      |          |              |         |                 |         |     |        |
|----------------------|---------------|------|---------------------------------------------------------------------------|----|------|------|----------|--------------|---------|-----------------|---------|-----|--------|
| Bushra Imtiaz        | NA            | 2014 | Oophorectomy (History of malignant neoplasms)                             |    |      |      | AD       | case-control | Finland | 19,043 / 19,043 | NA      | 6.5 |        |
|                      |               |      | No (ref.)                                                                 | OR | 1.00 | 1.00 |          |              |         |                 |         |     | 1.00   |
|                      |               |      | Yes                                                                       | OR | 3.00 | 0.20 |          |              |         |                 |         |     | 44.87  |
| Thien Kieu Thi Phung | DCRS          | 2010 | Overall                                                                   |    |      |      | dementia | cohort       | Denmark | 2,313,388       | 95,239  | 5   |        |
|                      |               |      | Hysterectomy                                                              |    |      |      |          |              |         |                 | 3,534   |     |        |
|                      |               |      | Yes                                                                       | RR | 0.91 | 0.84 |          |              |         |                 | 0.98    |     | 91,705 |
|                      |               |      | No (ref.)                                                                 | RR | 1.00 | 1.00 |          |              |         |                 | 1.00    |     |        |
| Paola Gilsanz        | KPNC          | 2019 | Hysterectomy                                                              |    |      |      | dementia | cohort       | US      | 6,137           | 2577    | 7   |        |
|                      |               |      | No (ref.)                                                                 | HR | 1.00 | 1.00 |          |              |         | 1.00            |         |     | 12,981 |
|                      |               |      | Yes                                                                       | HR | 1.08 | 1.01 |          |              |         | 1.16            |         |     | 2,773  |
| A. Paganini-Hill     | The 90+ Study | 2020 | Surgical without bilateral oophorectomy                                   | HR | 1.24 | 0.85 | 1.81     | dementia     | cohort  | US              | 424     | 209 | 5.5    |
| Thien Kieu Thi Phung | DCRS          | 2010 | Indications for hysterectomy                                              |    |      |      | dementia | cohort       | Denmark | 2,313,388       |         | 5   |        |
|                      |               |      | Unknown indication                                                        | RR | 1.04 | 0.88 |          |              |         |                 | 1.22    |     | 174    |
|                      |               |      | Benign                                                                    | RR | 1.06 | 0.99 |          |              |         |                 | 1.15    |     | 2,161  |
|                      |               |      | Malignant (ref.)                                                          | RR | 1.00 | 1.00 |          |              |         |                 | 1.00    |     | 1,199  |
|                      |               |      | No hysterectomy (ref.)                                                    | RR | 1.00 | 1.00 |          |              |         |                 | 1.00    |     | 91,705 |
| Jessica Gong         | UK Biobank    | 2022 | Hysterectomy versus not                                                   | HR | 1.12 | 1.01 | 1.25     | dementia     | cohort  | UK              | 273,240 | 537 | 6.5    |
| Bushra Imtiaz        | NA            | 2014 | Hysterectomy (History of malignant neoplasms)                             |    |      |      | AD       | case-control | Finland | 19,043 / 19,043 | NA      | 6.5 |        |
|                      |               |      | No (ref.)                                                                 | OR | 1.00 | 1.00 |          |              |         |                 |         |     | 1.00   |
|                      |               |      | Yes                                                                       | OR | 3.00 | 0.20 |          |              |         |                 |         |     | 44.87  |
| Bushra Imtiaz        | NA            | 2014 | Hysterectomy (No history of malignant neoplasms)                          |    |      |      | AD       | case-control | Finland | 19,043 / 19,043 | NA      | 6.5 |        |
|                      |               |      | No (ref.)                                                                 | OR | 1.00 | 1.00 |          |              |         |                 |         |     | 1.00   |
|                      |               |      | Yes                                                                       | OR | 0.89 | 0.81 |          |              |         |                 |         |     | 0.97   |
| Bushra Imtiaz        | NA            | 2014 | Hysterectomy with bilateral oophorectomy (History of malignant neoplasms) |    |      | AD   |          | Finland      |         | NA              | 6.5     |     |        |

|               |    |      |                                                                              |    |      |      |       |    |              |         |                 |    |     |
|---------------|----|------|------------------------------------------------------------------------------|----|------|------|-------|----|--------------|---------|-----------------|----|-----|
|               |    |      | No (ref.)                                                                    | OR | 1.00 | 1.00 | 1.00  |    | case-control |         | 19,043 / 19,043 |    |     |
|               |    |      | Yes                                                                          | OR | 3.00 | 0.20 | 44.87 |    |              |         |                 |    |     |
| Bushra Imtiaz | NA | 2014 | Hysterectomy with bilateral oophorectomy (No history of malignant neoplasms) |    |      |      |       | AD | case-control | Finland | 19,043 / 19,043 | NA | 6.5 |
|               |    |      | No (ref.)                                                                    | OR | 1.00 | 1.00 | 1.00  |    |              |         |                 |    |     |
|               |    |      | Yes                                                                          | OR | 0.85 | 0.75 | 0.98  |    |              |         |                 |    |     |

3. Characteristics of studies with cognitive decline, dementia, and AD by pregnancy-related diseases.

| Author        | Project  | Year | Description of risk factor     | RR/OR/<br>HR | Adjusted<br>risk | LCI  | UCI  | Outcome  | design | Country | Sample    | Case  | Score |
|---------------|----------|------|--------------------------------|--------------|------------------|------|------|----------|--------|---------|-----------|-------|-------|
| Ellika Andolf | NA       | 2020 | Pregnancy induced hypertension | HR           | 1.10             | 0.93 | 1.29 | ACD      | cohort | Sweden  | 1128709   | 6881  | 5.5   |
| Ellika Andolf | NA       | 2020 | Pregnancy induced hypertension | HR           | 0.98             | 0.82 | 1.17 | dementia | cohort | Sweden  | 1128709   | 6488  | 5.5   |
| M Nelander    | SALT     | 2017 | Pregnancy induced hypertension | HR           | 1.19             | 0.79 | 1.73 | dementia | cohort | Sweden  | 3232      | 197   | 6.5   |
| Ellika Andolf | NA       | 2020 | Pregnancy induced hypertension | HR           | 1.24             | 0.92 | 1.65 | AD       | cohort | Sweden  | 1128709   | 2161  | 5.5   |
| Ellika Andolf | NA       | 2020 | Preeclampsia                   | HR           | 0.98             | 0.87 | 1.10 | ACD      | cohort | Sweden  | 1128709   | 6,881 | 5.5   |
| Ellika Andolf | NA       | 2020 | Preeclampsia                   | HR           | 0.90             | 0.80 | 1.02 | dementia | cohort | Sweden  | 1128709   | 6488  | 5.5   |
| Ellika Andolf | MBR, TPR | 2007 | Preeclampsia                   | HR           | 0.50             | 0.19 | 1.34 | dementia | cohort | Sweden  | 283 902   | 608   | 7.5   |
| Saima Basit   | DCRS     | 2018 | History of pre-eclampsia,      | HR           | 1.26             | 1.03 | 1.54 | dementia | cohort | Denmark | 1 178 005 | 1728  | 7     |
| Saima Basit   | DCRS     | 2018 | History of pre-eclampsia,      | HR           | 1.38             | 1.00 | 1.91 | AD       | cohort | Denmark | 1 178 005 | 676   | 7     |
| Ellika Andolf | NA       | 2020 | Preeclampsia                   | HR           | 1.01             | 0.81 | 1.26 | AD       | cohort | Sweden  | 1128709   | 2161  | 5.5   |
| Ellika Andolf | NA       | 2020 | Abruptio placenta              | HR           | 0.85             | 0.61 | 1.19 | ACD      | cohort | Sweden  | 1128709   | 6881  | 5.5   |
| Ellika Andolf | NA       | 2020 | Placental anomaly              | HR           | 1.07             | 0.58 | 2.38 | ACD      | cohort | Sweden  | 1128709   | 6881  | 5.5   |
| Ellika Andolf | NA       | 2020 | Fetal growth restriction (NPR) | HR           | 0.79             | 0.52 | 1.19 | ACD      | cohort | Sweden  | 1128709   | 6881  | 5.5   |
| Ellika Andolf | NA       | 2020 | Excessive growth (NPR)         | HR           | 0.53             | 0.17 | 1.64 | ACD      | cohort | Sweden  | 1128709   | 6881  | 5.5   |
| Ellika Andolf | NA       | 2020 | Preterm labor and birth        | HR           | 1.12             | 0.99 | 1.27 | ACD      | cohort | Sweden  | 1128709   | 6881  | 5.5   |
| Ellika Andolf | NA       | 2020 | PPROM                          | HR           | 1.14             | 1.00 | 1.29 | ACD      | cohort | Sweden  | 1128709   | 6881  | 5.5   |
| Ellika Andolf | NA       | 2020 | Gestational diabetes           | HR           | 0.78             | 0.48 | 1.28 | ACD      | cohort | Sweden  | 1128709   | 6881  | 5.5   |
| Ellika Andolf | NA       | 2020 | Intrauterine fetal death       | HR           | 1.15             | 0.62 | 2.14 | ACD      | cohort | Sweden  | 1128709   | 6881  | 5.5   |
| Ellika Andolf | NA       | 2020 | Infertility                    | HR           | 0.80             | 0.68 | 0.96 | ACD      | cohort | Sweden  | 1128709   | 6881  | 5.5   |

4. Characteristics of studies with cognitive decline, dementia, and AD by sex hormones in female.

a) Characteristics of studies with cognitive decline, dementia, and AD by estradiol in female.

| Author                 | Project            | Year | Description of risk factor       | RR/OR/<br>HR | Adjusted<br>risk | LCI  | UCI  | Outcome              | design | Country     | Sample | Case | Score |
|------------------------|--------------------|------|----------------------------------|--------------|------------------|------|------|----------------------|--------|-------------|--------|------|-------|
| Kristine Yaffe         | SOF                | 1998 | Quartiles of estradiol, pg/mL    |              |                  |      |      | cognitive<br>decline | cohort | US          | 532    | NA   | 3.5   |
|                        |                    |      | 1 (<5) (ref.)                    | OR           | 1.00             | 1.00 | 1.00 |                      |        |             |        |      |       |
|                        |                    |      | 2 (5-7)                          | OR           | 0.50             | 0.10 | 1.50 |                      |        |             |        |      |       |
|                        |                    |      | 4 (10-25)                        | OR           | 1.00             | 0.40 | 2.70 |                      |        |             |        |      |       |
| Mirjam I.<br>Geerlings | Rotterdam<br>Study | 2003 | Total estradiol tertiles, pmol/L |              |                  |      |      | dementia             | cohort | Netherlands | 508    | 114  | 7.5   |
|                        |                    |      | ≥0.0 and <7.1 (ref.)             | HR           | 1.00             | 1.00 | 1.00 |                      |        |             |        | 22   |       |
|                        |                    |      | ≥7.1 and <20                     | HR           | 1.58             | 0.75 | 3.35 |                      |        |             |        | 27   |       |
|                        |                    |      | ≥20 and ≤67                      | HR           | 1.99             | 0.89 | 4.45 |                      |        |             |        | 27   |       |
|                        |                    |      | Per SD (14pmol/L) increase       | HR           | 1.45             | 1.08 | 1.94 |                      |        |             |        | 76   |       |
| Laure<br>Carcaillon    | 3C                 | 2014 | Total-E2(estradiol), pg/mL       |              |                  |      |      | dementia             | cohort | France      | 5262   | 132  | 7     |
|                        |                    |      | Q1: E2 ≤3.49                     | HR           | 2.20             | 1.07 | 4.52 |                      |        |             |        | 41   |       |
|                        |                    |      | Q2: 3.49–5.30                    | HR           | 1.46             | 0.68 | 3.15 |                      |        |             |        | 26   |       |
|                        |                    |      | Q3: 5.30–8.00 (ref.)             | HR           | 1.00             | 1.00 | 1.00 |                      |        |             |        | 25   |       |
|                        |                    |      | Q4: E2 >8.00                     | HR           | 2.43             | 1.15 | 5.20 |                      |        |             |        | 40   |       |
| Giovanni<br>Ravaglia   | CSBA               | 2007 | Serum total estradiol, pg/mL     |              |                  |      |      | dementia             | cohort | Italy       | 433    | 71   | 6     |
|                        |                    |      | Low (undetectable) (ref.)        | HR           | 1.00             | 1.00 | 1.00 |                      |        |             | 240    |      |       |
|                        |                    |      | High (≥10)                       | HR           | 1.75             | 1.06 | 2.89 |                      |        |             | 193    |      |       |
| Mirjam I.<br>Geerlings | Rotterdam<br>Study | 2003 | Total estradiol tertiles, pmol/L |              |                  |      |      | AD                   | cohort | Netherlands | 508    |      | 7.5   |
|                        |                    |      | ≥0.0 and <7.1 (ref.)             | HR           | 1.00             | 1.00 | 1.00 |                      |        |             |        | 17   |       |
|                        |                    |      | ≥7.1 and <20                     | HR           | 1.58             | 0.70 | 3.55 |                      |        |             |        | 22   |       |
|                        |                    |      | ≥20 and ≤67                      | HR           | 1.41             | 0.57 | 3.50 |                      |        |             |        | 16   |       |

|                     |                 |      |                                         |    |      |      |      |                   |        |             |      |    |     |
|---------------------|-----------------|------|-----------------------------------------|----|------|------|------|-------------------|--------|-------------|------|----|-----|
|                     |                 |      | Per SD (14 pmol/L) increase             | HR | 1.30 | 0.88 | 1.91 |                   |        |             |      | 55 |     |
| Laure Carcaillon    | 3C              | 2014 | Total-E2(estradiol), pg/mL              |    |      |      |      | AD                | cohort | France      | 5262 | 90 | 7   |
|                     |                 |      | Q1: E2 ≤3.49                            | HR | 2.07 | 0.89 | 4.75 |                   |        |             |      | 28 |     |
|                     |                 |      | Q2: 3.49–5.30                           | HR | 1.37 | 0.57 | 3.35 |                   |        |             |      | 18 |     |
|                     |                 |      | Q3: 5.30–8.00 (ref.)                    | HR | 1.00 | 1.00 | 1.00 |                   |        |             |      | 17 |     |
|                     |                 |      | Q4: E2 >8.00                            | HR | 2.38 | 0.99 | 5.75 |                   |        |             |      | 27 |     |
| Giovanni Ravaglia   | CSBA            | 2007 | Serum total estradiol, pg/mL            |    |      |      |      | AD                | cohort | Italy       | 433  | 46 | 6   |
|                     |                 |      | Low (undetectable) (ref.)               | HR | 1.00 | 1.00 | 1.00 |                   |        |             |      |    |     |
|                     |                 |      | High (≥10 pg/mL)                        | HR | 1.94 | 1.04 | 3.61 |                   |        |             |      |    |     |
| Kristine Yaffe      | SOF             | 2010 | Bioavailable oestradiol, pmol/L         |    |      |      |      | cognitive decline | cohort | US          | 292  | 37 | 6.5 |
|                     |                 |      | Low 1·9 (0·5–2·9) (ref.)                | OR | 1.00 | 1.00 | 1.00 |                   |        |             | 97   | 15 |     |
|                     |                 |      | Mid 4·0 (2·9–5·6)                       | OR | 1.20 | 0.60 | 2.70 |                   |        |             | 100  | 17 |     |
|                     |                 |      | High 11·0 (5·7–38·9)                    | OR | 0.30 | 0.10 | 1.00 |                   |        |             | 94   | 5  |     |
| K. Yaffe            | ABC             | 2006 | Bioavailable estradiol tertile          |    |      |      |      | cognitive decline | cohort | US          | 333  | NA | 5.5 |
|                     |                 |      | 1                                       | OR | 3.90 | 1.60 | 9.60 |                   |        |             |      |    |     |
|                     |                 |      | 2                                       | OR | 1.50 | 0.60 | 3.80 |                   |        |             |      |    |     |
|                     |                 |      | 3 (ref.)                                | OR | 1.00 | 1.00 | 1.00 |                   |        |             |      |    |     |
| Mirjam I. Geerlings | Rotterdam Study | 2003 | Bioavailable estradiol tertiles, pmol/L |    |      |      |      | dementia          | cohort | Netherlands | 508  |    | 7.5 |
|                     |                 |      | ≥0.0 and <4.7 (ref.)                    | HR | 1.00 | 1.00 | 1.00 |                   |        |             |      | 17 |     |
|                     |                 |      | ≥4.7 and <14                            | HR | 1.47 | 0.59 | 3.63 |                   |        |             |      | 18 |     |
|                     |                 |      | ≥14 and ≤49                             | HR | 1.86 | 0.72 | 4.81 |                   |        |             |      | 21 |     |
|                     |                 |      | Per SD (11pmol/L) increase              | HR | 1.49 | 1.01 | 2.2  |                   |        |             |      | 56 |     |
| Laure Carcaillon    | 3C              | 2014 | Bio-E2, pg/mL                           |    |      |      |      | dementia          | cohort | France      | 5262 |    | 7   |
|                     |                 |      | Q1: Bio-E2 ≤2.29                        | HR | 1.95 | 0.99 | 3.89 |                   |        |             |      | 44 |     |
|                     |                 |      | Q2: 2.29–3.60                           | HR | 0.98 | 0.42 | 2.27 |                   |        |             |      | 24 |     |

|                |     |      |                                     |    |      |      |      |                   |        |    |     |    |     |
|----------------|-----|------|-------------------------------------|----|------|------|------|-------------------|--------|----|-----|----|-----|
|                |     |      | Q3: 3.60–5.60 (ref.)                | HR | 1.00 | 1.00 | 1.00 |                   |        |    |     | 25 |     |
|                |     |      | Q4: Bio-E2 >5.60                    | HR | 2.45 | 1.19 | 5.05 |                   |        |    |     | 39 |     |
| Kristine Yaffe | SOF | 2010 | Non-protein-bound oestradiol, pg/mL |    |      |      |      | cognitive decline | cohort | US | 292 | 37 | 6.5 |
|                |     |      | Low (ref.) 0.2 (0.1–0.3)            | OR | 1.00 | 1.00 | 1.00 |                   |        |    | 106 | 17 |     |
|                |     |      | Mid 0.4 (0.3–0.5)                   | OR | 1.00 | 0.40 | 2.10 |                   |        |    | 92  | 15 |     |
|                |     |      | High 0.9 (0.6–4.5)                  | OR | 0.30 | 0.10 | 0.90 |                   |        |    | 94  | 5  |     |

b) Characteristics of studies with cognitive decline, dementia, and AD by testosterone in female.

| Author            | Project | Year | Description of risk factor     | RR/OR/<br>HR | Adjusted<br>risk | LCI  | UCI  | Outcome              | design | Country | Sample | Case | Score |
|-------------------|---------|------|--------------------------------|--------------|------------------|------|------|----------------------|--------|---------|--------|------|-------|
| Kristine Yaffe    | SOF     | 2010 | Total testosterone, ng/mL      |              |                  |      |      | cognitive<br>decline | cohort | US      | 292    | 37   | 6.5   |
|                   |         |      | Low 0.4 (0–0.5) (ref.)         | OR           | 1.00             | 1.00 | 1.00 |                      |        |         | 100    | 11   |       |
|                   |         |      | Mid 0.7 (0.5–0.8)              | OR           | 0.90             | 0.40 | 2.30 |                      |        |         | 99     | 11   |       |
|                   |         |      | High 1.3 (0.9–3.0)             | OR           | 1.50             | 0.60 | 3.50 |                      |        |         | 93     | 15   |       |
| Laure Carcaillon  | 3C      | 2014 | Total testosterone, ng/mL      |              |                  |      |      | dementia             | cohort | France  | 5262   |      | 7     |
|                   |         |      | Q1: total-T ≤0.21              | HR           | 1.33             | 0.69 | 2.58 |                      |        |         |        | 42   |       |
|                   |         |      | Q2: 0.21–0.32                  | HR           | 1.07             | 0.55 | 2.07 |                      |        |         |        | 25   |       |
|                   |         |      | Q3: 0.32–0.45                  | HR           | 1.02             | 0.52 | 1.97 |                      |        |         |        | 27   |       |
|                   |         |      | Q4: Total-T >0.45 (ref.)       | HR           | 1.00             | 1.00 | 1.00 |                      |        |         |        | 27   |       |
| Laure Carcaillon  | 3C      | 2014 | Total testosterone, ng/mL      |              |                  |      |      | AD                   | cohort | France  | 5262   |      | 7     |
|                   |         |      | Q1: total-T ≤0.21              | HR           | 1.15             | 0.51 | 2.61 |                      |        |         |        | 90   |       |
|                   |         |      | Q2: 0.21–0.32                  | HR           | 1.05             | 0.47 | 2.33 |                      |        |         |        | 25   |       |
|                   |         |      | Q3: 0.32–0.45                  | HR           | 1.52             | 0.71 | 3.28 |                      |        |         |        | 16   |       |
|                   |         |      | Q4: Total-T >0.45 (ref.)       | HR           | 1.00             | 1.00 | 1.00 |                      |        |         |        | 23   |       |
| Kristine Yaffe    | SOF     | 2010 | Non-protein-bound testosterone |              |                  |      |      | cognitive<br>decline | cohort | US      | 292    | 37   | 6.5   |
|                   |         |      | Low 4.4 (0–6.3) (ref.)         | OR           | 1.00             |      |      |                      |        |         | 101    | 12   |       |
|                   |         |      | Mid 8.5 (6.6–10.8)             | OR           | 1.00             | 0.40 | 2.50 |                      |        |         | 93     | 11   |       |
|                   |         |      | High 17.3 (11.1–40.3)          | OR           | 1.20             | 0.50 | 2.80 |                      |        |         | 98     | 14   |       |
| Giovanni Ravaglia | CSBA    | 2007 | Serum free testosterone        |              |                  |      |      | dementia             | cohort | Italy   | 433    | 71   | 6     |
|                   |         |      | As a two-level variable        |              |                  |      |      |                      |        |         |        |      |       |
|                   |         |      | Low (≤1.3 pg/mL) (ref.)        | HR           | 1.00             | 1.00 | 1.00 |                      |        |         |        |      |       |
|                   |         |      | High (≥ 1.4 pg/mL)             | HR           | 1.20             | 0.69 | 1.88 |                      |        |         |        |      |       |

|                   |      |      |                                  |    |      |      |      |    |        |       |     |    |   |
|-------------------|------|------|----------------------------------|----|------|------|------|----|--------|-------|-----|----|---|
|                   |      |      | As a three-level variable, pg/mL |    |      |      |      |    |        |       |     |    |   |
|                   |      |      | Low (<1.1) (ref.)                | HR | 1.00 | 1.00 | 1.00 |    |        |       |     |    |   |
|                   |      |      | Intermediate (1.1–1.7)           | HR | 1.15 | 0.59 | 2.21 |    |        |       |     |    |   |
|                   |      |      | High (>1.7)                      | HR | 1.18 | 0.55 | 2.53 |    |        |       |     |    |   |
| Giovanni Ravaglia | CSBA | 2007 | Serum free testosterone, pg/mL   |    |      |      |      | AD | cohort | Italy | 433 | 46 | 6 |
|                   |      |      | As a two-level variable          |    |      |      |      |    |        |       |     |    |   |
|                   |      |      | Low ( $\leq$ 1.3) (ref.)         | HR | 1.00 | 1.00 | 1.00 |    |        |       |     |    |   |
|                   |      |      | High ( $\geq$ 1.4)               | HR | 1.17 | 0.62 | 2.20 |    |        |       |     |    |   |
|                   |      |      | As a three-level variable, pg/mL |    |      |      |      |    |        |       |     |    |   |
|                   |      |      | Low (<1.1) (ref.)                | HR | 1.00 | 1.00 | 1.00 |    |        |       |     |    |   |
|                   |      |      | Intermediate (1.1–1.7)           | HR | 1.83 | 0.79 | 4.21 |    |        |       |     |    |   |
|                   |      |      | High (>1.7)                      | HR | 1.36 | 0.52 | 3.54 |    |        |       |     |    |   |



c) Characteristics of studies with cognitive decline, dementia, and AD by estrone and SHBG in female.

| Author         | Project   | Year | Description of risk factor    | RR/OR/<br>HR | Adjusted<br>risk | LCI  | UCI  | Outcome              | design | Country | Sample | Case | Score |
|----------------|-----------|------|-------------------------------|--------------|------------------|------|------|----------------------|--------|---------|--------|------|-------|
| Kristine Yaffe | SOF       | 1998 | Quartiles of Estrone, pg/mL   |              |                  |      |      | cognitive<br>decline | cohort | US      | 532    | NA   | 3.5   |
|                |           |      | 1 (0-15) (ref.)               | OR           | 1.00             | 1.00 | 1.00 |                      |        |         | 142    |      |       |
|                |           |      | 2 (16-22)                     | OR           | 0.80             | 0.20 | 2.00 |                      |        |         | 130    |      |       |
|                |           |      | 4 (29-76)                     | OR           | 1.20             | 0.50 | 3.00 |                      |        |         | 138    |      |       |
| Majon Muller   | Manhattan | 2010 | SHBG per S.D.<br>(31.6nmol/L) | HR           | 1.30             | 1.10 | 1.70 | dementia             | cohort | US      | 514    | 96   | 6     |

5. Characteristics of studies with cognitive decline, dementia, and AD by male-specific diseases.

| Author                     | Project  | Year | Description of risk factor | RR/OR/<br>HR | Adjusted<br>risk | LCI  | UCI   | Outcome               | design | Country  | Sample  | Case       | Score |
|----------------------------|----------|------|----------------------------|--------------|------------------|------|-------|-----------------------|--------|----------|---------|------------|-------|
| Chun-Ming<br>Yang          | NHIRD    | 2015 | ED                         | HR           | 1.68             | 1.31 | 2.16  | AD                    | cohort | CN       | 4153    | 82         | 6.5   |
|                            |          |      | Non-ED (ref.)              | HR           | 1.00             | 1.00 | 1.00  |                       |        |          |         | 246        |       |
|                            |          |      | ED                         | HR           | 1.63             | 1.02 | 2.62  | Non-AD                |        |          | 20,765  | 23         |       |
|                            |          |      | Non-ED (ref.)              | HR           | 1.00             | 1.00 | 1.00  |                       |        |          |         | 71         |       |
| Mette<br>Norgaard          | DNPR     | 2021 | BPH                        | HR           | 1.16             | 1.10 | 1.21  | AD(1-10 y)            | cohort | Denmark  | 1404202 | 2572:7390  | 7     |
|                            |          |      | BPH                        | HR           | 1.10             | 0.99 | 1.21  | AD(10-21y)            |        |          |         | 1031:2556  |       |
|                            |          |      | BPH                        | HR           | 1.21             | 1.17 | 1.25  | dementia<br>(1-10 y)  |        |          |         | 5943:16124 |       |
|                            |          |      | BPH                        | HR           | 1.18             | 1.10 | 1.27  | dementia<br>(10-21 y) |        |          |         | 1964:4621  |       |
| Bum Sik Tae                | NHIS     | 2018 | No ADT (ref.)              | HR           | 1.00             | 1.00 | 1.00  | cognitive<br>decline  | cohort | Korea    | 37549   | 4,743      | 5.5   |
|                            |          |      | ADT < 12 months            | HR           | 0.99             | 0.92 | 1.07  |                       |        |          |         |            |       |
|                            |          |      | ADT ≥ 12 months            | HR           | 1.54             | 1.43 | 1.66  |                       |        |          |         |            |       |
| N. Araújo                  | NEON-PC  | 2022 | ADT                        | OR           | 3.71             | 1.31 | 10.59 | cognitive<br>decline  | cohort | Portugal | 366     | NA         | 5     |
| Hector Alonso-<br>Quiñones | MCSA     | 2021 | ADT                        | HR           | 1.25             | 0.75 | 2.1   | cognitive<br>decline  | cohort | US       | 235     | NA         | 8     |
| Li-Ting Kao                | LHID2005 | 2017 | Patients receiving ADT     | HR           | 1.21             | 0.82 | 1.78  | dementia              | cohort | CN       | 1314    | NA         | 7     |
|                            |          |      | Not receiving ADT (ref.)   | HR           | 1.00             | 1.00 | 1.00  |                       |        |          |         |            |       |
|                            |          |      | Patients receiving ADT     |              |                  |      |       |                       |        |          |         |            |       |
|                            |          |      | With GnRH agonists         | HR           | 1.39             | 0.80 | 2.40  |                       |        |          |         |            |       |
|                            |          |      | Without GnRH agonists      | HR           | 1.13             | 0.75 | 1.71  |                       |        |          |         |            |       |

|                       |        |      |                                      |      |      |      |      |          |        |        |         |      |   |
|-----------------------|--------|------|--------------------------------------|------|------|------|------|----------|--------|--------|---------|------|---|
|                       |        |      | Not receiving ADT (ref.)             | HR   | 1.00 | 1.00 | 1.00 |          |        |        |         |      |   |
| Kevin T. Nead         | SUHS   | 2016 | No ADT use (ref.)                    | HR   | 1.00 | 1.00 | 1.00 | dementia | cohort | US     | 9272    | 314  | 7 |
|                       |        |      | ADT use                              | HR   | 2.21 | 1.72 | 2.83 |          |        |        |         |      |   |
|                       |        |      | ADT use, mo<12                       | HR   | 1.95 | 1.31 | 2.89 |          |        |        |         |      |   |
|                       |        |      | ADT use, mo≥12                       | HR   | 2.36 | 1.64 | 3.38 |          |        |        |         |      |   |
| Myungsun Shim         | NHIS   | 2020 | GnRHa use                            | HR   | 0.91 | 0.76 | 1.10 | dementia | cohort | Korea  | 15324   | 354  | 6 |
|                       |        |      | GnRHa use (Duration month)           |      |      |      |      |          |        |        |         |      |   |
|                       |        |      | ≤12                                  | HR   | 0.99 | 0.92 | 1.79 |          |        |        |         |      |   |
|                       |        |      | 13-24                                | HR   | 1.32 | 0.91 | 1.5  |          |        |        |         |      |   |
|                       |        |      | 25-36                                | HR   | 1.15 | 0.88 | 1.31 |          |        |        |         |      |   |
| ≥37                   | HR     | 1.27 | 1.02                                 | 1.65 |      |      |      |          |        |        |         |      |   |
| David Robinson        | PCBaSe | 2019 | No prostate cancer (ref.)            | HR   | 1.00 | 1.00 | 1.00 | dementia | cohort | Sweden | 146,985 | 7432 | 6 |
|                       |        |      | watchful waiting.                    | HR   | 0.99 | 0.89 | 1.1  |          |        |        |         | 359  |   |
|                       |        |      | antiandrogen                         | HR   | 0.94 | 0.84 | 1.05 |          |        |        |         | 330  |   |
|                       |        |      | GnRH agonists                        | HR   | 1.15 | 1.07 | 1.23 |          |        |        |         | 841  |   |
|                       |        |      | Orchidectomy                         | HR   | 1.6  | 1.32 | 1.93 |          |        |        |         | 110  |   |
| Farzin Khosrow-Khavar | CPRD   | 2016 | Nonuse Use (ref.)                    | HR   | 1.00 | 1.00 | 1.00 | dementia | cohort | UK     | 15,593  | 275  | 7 |
|                       |        |      | Use                                  | HR   | 1.02 | 0.87 | 1.19 |          |        |        | 15,310  | 524  |   |
|                       |        |      | ADT type                             |      |      |      |      |          |        |        |         |      |   |
|                       |        |      | GnRH agonists alone                  | HR   | 1.06 | 0.87 | 1.28 |          |        |        |         | 197  |   |
|                       |        |      | Oral antiandrogens alone             | HR   | 1.01 | 0.76 | 1.33 |          |        |        |         | 64   |   |
|                       |        |      | GnRH agonists and oral antiandrogens | HR   | 1.02 | 0.85 | 1.22 |          |        |        |         | 249  |   |
|                       |        |      | Other types or combinations          | HR   | 0.69 | 0.40 | 1.19 |          |        |        |         | 14   |   |
|                       |        |      | Duration of ADT use, months          |      |      |      |      |          |        |        |         |      |   |

|                         |       |      |                       |    |      |      |          |          |        |       |           |         |         |  |  |
|-------------------------|-------|------|-----------------------|----|------|------|----------|----------|--------|-------|-----------|---------|---------|--|--|
|                         |       |      | <6                    | HR | 1.01 | 0.62 | 1.65     |          |        |       |           | 17      |         |  |  |
|                         |       |      | 6--12                 | HR | 0.84 | 0.62 | 1.13     |          |        |       |           | 51      |         |  |  |
|                         |       |      | 13-18                 | HR | 1.09 | 0.82 | 1.44     |          |        |       |           | 69      |         |  |  |
| Ravishankar Jayadevappa | SEER  | 2018 | ADT                   | HR | 1.20 | 1.17 | 1.24     | dementia | cohort | US    | 154 089   | 8618    | 7       |  |  |
|                         |       |      | No ADT (ref.)         | HR | 1.00 | 1.00 | 1.00     |          |        |       |           | 14 511  |         |  |  |
|                         |       |      | 1-4 ADT doses         | HR | 1.19 | 1.15 | 1.23     |          |        |       |           |         |         |  |  |
|                         |       |      | 5-8 ADT doses         | HR | 1.24 | 1.19 | 1.29     |          |        |       |           |         |         |  |  |
|                         |       |      | >8 ADT doses          | HR | 1.21 | 1.15 | 1.28     |          |        |       |           |         |         |  |  |
|                         |       |      | No ADT (ref.)         | HR | 1.00 | 1.00 | 1.00     |          |        |       |           |         |         |  |  |
| Anna Krasnova           | SEER  | 2019 | ADT                   | HR | 1.17 | 1.07 | 1.27     | dementia | cohort | US    | 100,414   | 3988    | 5       |  |  |
|                         |       |      | ADT duration(months)  |    |      |      |          |          |        |       |           |         |         |  |  |
|                         |       |      | 1--6                  | HR | 1.04 | 0.94 | 1.14     |          |        |       |           |         |         |  |  |
|                         |       |      | ≥7                    | HR | 1.25 | 1.11 | 1.40     |          |        |       |           |         |         |  |  |
|                         |       |      | Dose continuous       | HR | 1.12 | 1.06 | 1.19     |          |        |       |           |         |         |  |  |
| Seo Hyon Baik           | MBSF  | 2017 | ADT treated           | HR | 1.01 | 1.01 | 1.02     | dementia | cohort | US    | 1,238,879 | 109,815 | 5       |  |  |
|                         |       |      | Prostatectomy treated | HR | 0.67 | 0.66 | 0.68     |          |        |       |           |         |         |  |  |
| Jihun Kang              | KNHIS | 2020 | Control (ref.)        | HR | 1.00 | 1.00 | 1.00     | dementia | cohort | Korea | 260919    | 9566    | 7.5     |  |  |
|                         |       |      | AS/WW                 | HR | 1.00 | 0.91 | 1.11     |          |        |       |           | 389     |         |  |  |
|                         |       |      | Surgery               | HR | 0.89 | 0.82 | 0.97     |          |        |       |           | 644     |         |  |  |
|                         |       |      | Surgery + ADT         | HR | 1.07 | 0.95 | 1.21     |          |        |       |           | 278     |         |  |  |
|                         |       |      | RT                    | HR | 0.99 | 0.65 | 1.51     |          |        |       |           | 22      |         |  |  |
|                         |       |      | RT + ADT              | HR | 1.13 | 0.89 | 1.42     |          |        |       |           | 72      |         |  |  |
|                         |       |      | ADT                   | HR | 1.21 | 1.14 | 1.28     |          |        |       |           | 1413    |         |  |  |
| Jong Won Kim            | HIRA  | 2021 | ADT use               |    |      |      | dementia | cohort   | Korea  |       | NA        | 4       |         |  |  |
|                         |       |      | No (ref.)             | HR | 1.00 | 1.00 |          |          |        | 1.00  |           |         | 102,973 |  |  |

|                   |         |      |                         |    |      |      |      |          |        |    |        |     |   |  |
|-------------------|---------|------|-------------------------|----|------|------|------|----------|--------|----|--------|-----|---|--|
|                   |         |      | Yes                     | HR | 1.07 | 1.01 | 1.13 |          |        |    | 29,727 |     |   |  |
|                   |         |      | Duration of ADT (y)     |    |      |      |      |          |        |    |        |     |   |  |
|                   |         |      | No (ref.)               | HR | 1.00 | 1.00 | 1.00 |          |        |    |        |     |   |  |
|                   |         |      | <1                      | HR | 1.12 | 1.01 | 1.25 |          |        |    |        |     |   |  |
|                   |         |      | 1- 2                    | HR | 1.32 | 1.20 | 1.47 |          |        |    |        |     |   |  |
|                   |         |      | 2- 3                    | HR | 1.09 | 0.97 | 1.21 |          |        |    |        |     |   |  |
| Peter E. Lonergan | CaPSURE | 2022 | ADT                     | HR | 1.59 | 1.03 | 2.44 | dementia | cohort | US | 13,570 | 317 | 7 |  |
| Jui-Ming Liu      | NHID    | 2022 | ADT-naïve group         | HR | 1.00 | 1.00 | 1.00 | dementia | cohort | CN | 8743   | 121 | 6 |  |
|                   |         |      | ADT group               | HR | 1.12 | 0.87 | 1.43 |          |        |    | 8743   | 134 |   |  |
|                   |         |      | GnRH agonist-based ADT  |    |      |      |      |          |        |    |        |     |   |  |
|                   |         |      | ADT-naïve group         | HR | 1.00 | 1.00 | 1.00 |          |        |    | 8461   | 121 |   |  |
|                   |         |      | ADT group               | HR | 0.78 | 0.59 | 1.05 |          |        |    | 8461   | 75  |   |  |
|                   |         |      | Oral antiandrogens only |    |      |      |      |          |        |    |        |     |   |  |
|                   |         |      | ADT-naïve group         | HR | 1.00 | 1.00 | 1.00 |          |        |    | 7087   | 114 |   |  |
|                   |         |      | ADT group               | HR | 1.18 | 0.93 | 1.49 |          |        |    | 7087   | 171 |   |  |
|                   |         |      | <6 months               | HR | 0.88 | 0.59 | 1.32 |          |        |    | 3792   | 37  |   |  |
|                   |         |      | 6–12 months             | HR | 1.27 | 0.85 | 1.91 |          |        |    | 2987   | 41  |   |  |
|                   |         |      | 13–18 months            | HR | 1.08 | 0.62 | 1.88 |          |        |    | 1928   | 19  |   |  |
|                   |         |      | 19–24 months            | HR | 1.19 | 0.70 | 2.05 |          |        |    | 1807   | 23  |   |  |
|                   |         |      | >24 months              | HR | 0.59 | 0.40 | 0.85 |          |        |    | 5287   | 42  |   |  |
|                   | THIN    |      | ADT-naïve group         | HR | 1.00 | 1.00 | 1.00 | dementia | cohort | UK | 14,949 | 237 | 6 |  |
|                   |         |      | ADT group               | HR | 1.02 | 0.85 | 1.23 |          |        |    | 14,949 | 220 |   |  |
|                   |         |      | GnRH agonist-based ADT  |    |      |      |      |          |        |    |        |     |   |  |
|                   |         |      | ADT-naïve group         | HR | 1.00 | 1.00 | 1.00 |          |        |    | 14,440 | 236 |   |  |

|                         |          |      |                           |    |      |      |      |    |        |        |           |         |     |  |
|-------------------------|----------|------|---------------------------|----|------|------|------|----|--------|--------|-----------|---------|-----|--|
|                         |          |      | ADT group                 | HR | 0.99 | 0.83 | 1.20 |    |        |        | 14,440    | 212     |     |  |
|                         |          |      | Oral antiandrogens only   |    |      |      |      |    |        |        |           |         |     |  |
|                         |          |      | ADT-naïve group (ref.)    | HR | 1.00 | 1.00 | 1.00 |    |        |        | 2921      | 44      |     |  |
|                         |          |      | ADT group                 | HR | 1.15 | 0.77 | 1.74 |    |        |        | 2921      | 48      |     |  |
|                         |          |      | <6 months                 | HR | 1.14 | 0.93 | 1.41 |    |        |        | 10,577    | 161     |     |  |
|                         |          |      | 6–12 months               | HR | 1.39 | 1.09 | 1.79 |    |        |        | 7661      | 117     |     |  |
|                         |          |      | 13–18 months              | HR | 1.25 | 0.9  | 1.74 |    |        |        | 4040      | 73      |     |  |
|                         |          |      | 19–24 months              | HR | 1.21 | 0.78 | 1.89 |    |        |        | 2158      | 44      |     |  |
|                         |          |      | >24 months                | HR | 0.68 | 0.52 | 0.91 |    |        |        | 4769      | 108     |     |  |
| S. D. Chung             | LHID2000 | 2016 | ADT                       | HR | 1.76 | 0.55 | 5.62 | AD | cohort | CN     | 1335      | NA      | 6   |  |
| Kevin T. Nead           | SUMS     | 2016 | ADT use                   | HR | 2.04 | 1.23 | 3.40 | AD | cohort | US     | 16888     | NA      | 5   |  |
| David Robinson          | PCBaSe   | 2019 | No prostate cancer (ref.) | HR | 1.00 | 1.00 | 1.00 | AD | cohort | Sweden | 146,985   | 3342    | 6   |  |
|                         |          |      | watchful waiting.         | HR | 1.01 | 0.86 | 1.18 |    |        |        |           | 169     |     |  |
|                         |          |      | antiandrogen              | HR | 0.97 | 0.83 | 1.14 |    |        |        |           | 163     |     |  |
|                         |          |      | GnRH agonists             | HR | 1.02 | 0.91 | 1.14 |    |        |        |           | 325     |     |  |
|                         |          |      | Orchidectomy              | HR | 1.33 | 0.96 | 1.84 |    |        |        |           | 37      |     |  |
| Ravishankar Jayadevappa | SEER     | 2018 | ADT                       | HR | 1.14 | 1.1  | 1.18 | AD | cohort | US     | 154 089   | 8137    | 7   |  |
|                         |          |      | 1-4 ADT doses             | HR | 1.19 | 1.15 | 1.24 |    |        |        |           |         |     |  |
|                         |          |      | 5-8 ADT doses             | HR | 1.28 | 1.22 | 1.35 |    |        |        |           |         |     |  |
|                         |          |      | >8 ADT doses              | HR | 1.24 | 1.16 | 1.34 |    |        |        |           |         |     |  |
|                         |          |      | No ADT (ref.)             | HR | 1.00 | 1.00 | 1.00 |    |        |        |           |         |     |  |
| Seo Hyon Baik           | MBSF     | 2017 | ADT                       | HR | 1.08 | 1.07 | 1.09 | AD | cohort | US     | 1,238,879 | 223,765 | 5   |  |
| Jihun Kang              | KNHIS    | 2020 | Control (ref.)            | HR | 1.00 | 1.00 | 1.00 | AD | cohort | 7.5    | 260919    | 7169    | 7.5 |  |
|                         |          |      | AS/WW                     | HR | 1.05 | 0.93 | 1.17 |    |        |        |           | 307     |     |  |
|                         |          |      | Surgery                   | HR | 0.90 | 0.82 | 0.98 |    |        |        |           | 478     |     |  |

|              |      |      |                     |    |      |      |      |    |        |       |         |      |   |
|--------------|------|------|---------------------|----|------|------|------|----|--------|-------|---------|------|---|
|              |      |      | Surgery + ADT       | HR | 1.05 | 0.91 | 1.21 |    |        |       |         | 201  |   |
|              |      |      | RT                  | HR | 1.12 | 0.7  | 1.78 |    |        |       |         | 18   |   |
|              |      |      | RT + ADT            | HR | 0.99 | 0.74 | 1.32 |    |        |       |         | 46   |   |
|              |      |      | ADT                 | HR | 1.21 | 1.13 | 1.29 |    |        |       |         | 1064 |   |
| Jong Won Kim | HIRA | 2021 | ADT use             |    |      |      |      | AD | cohort | Korea |         | NA   | 4 |
|              |      |      | No (ref.)           | HR | 1.00 | 1.00 | 1.00 |    |        |       | 102,973 |      |   |
|              |      |      | Yes                 | HR | 1.09 | 1.02 | 1.16 |    |        |       | 29,727  |      |   |
|              |      |      | Duration of ADT (y) |    |      |      |      |    |        |       |         |      |   |
|              |      |      | No (ref.)           | HR | 1.00 | 1.00 | 1.00 |    |        |       |         |      |   |
|              |      |      | <1                  | HR | 1.10 | 0.98 | 1.24 |    |        |       |         |      |   |
|              |      |      | 1 2                 | HR | 1.34 | 1.20 | 1.51 |    |        |       |         |      |   |
|              |      |      | 2 3                 | HR | 1.17 | 1.03 | 1.32 |    |        |       |         |      |   |
|              |      |      | ≥3                  | HR | 0.98 | 0.90 | 1.06 |    |        |       |         |      |   |

6. Characteristics of studies with cognitive decline, dementia, and AD by sex hormones in male.

a) Characteristics of studies with cognitive decline, dementia, and AD by estradiol in male.

| Author                 | Project            | Year | Description of risk factor                 | RR/OR/<br>HR | Adjusted<br>risk | LCI  | UCI  | Outcome              | design | Country     | Sample | Case | Score |
|------------------------|--------------------|------|--------------------------------------------|--------------|------------------|------|------|----------------------|--------|-------------|--------|------|-------|
| Majon Muller           | Zoetermeer         | 2008 | Total estradiol (pmol/L)1<br>S.D. increase | OR           | 1.60             | 1.00 | 2.50 | cognitive<br>decline | cohort | Netherlands | 218    | 44   | 7     |
| Laure<br>Carcaillon    | 3C                 | 2013 | Total estradiol                            |              |                  |      |      | dementia             | cohort | France      | 503    | 104  | 6     |
|                        |                    |      | 1-SD decrease                              | HR           | 0.90             | 0.67 | 1.05 |                      |        |             | 501    | 104  |       |
|                        |                    |      | 1                                          | HR           | 0.92             | 0.47 | 1.79 |                      |        |             | 162    | 33   |       |
|                        |                    |      | 2                                          | HR           | 0.72             | 0.35 | 1.47 |                      |        |             | 166    | 32   |       |
|                        |                    |      | 3 (ref.)                                   | HR           | 1.00             | 1.00 | 1.00 |                      |        |             | 173    | 39   |       |
| Andrew H               | HIMS               | 2018 | Estradiol (per SD decrease)                | HR           | 1.11             | 1.01 | 1.22 | dementia             | cohort | Australia   | 4069   | 499  | 6     |
|                        |                    |      | Q1                                         | HR           | 1.44             | 1.10 | 1.90 |                      |        |             |        |      |       |
|                        |                    |      | Q2                                         | HR           | 1.24             | 0.93 | 1.66 |                      |        |             |        |      |       |
|                        |                    |      | Q3                                         | HR           | 1.33             | 1.00 | 1.76 |                      |        |             |        |      |       |
|                        |                    |      | Q4 (ref.)                                  | HR           | 1.00             | 1.00 | 1.00 |                      |        |             |        |      |       |
| Mirjam I.<br>Geerlings | Rotterdam<br>Study | 2003 | Total estradiol tertiles, pmol/L           |              |                  |      |      | dementia             | cohort | Netherlands | 438    | 71   | 7.5   |
|                        |                    |      | ≥0.0 and <35 (ref.)                        | HR           | 1.00             | 1.00 | 1.00 |                      |        |             |        | 24   |       |
|                        |                    |      | ≥35 and <53                                | HR           | 0.45             | 0.18 | 1.16 |                      |        |             |        | 13   |       |
|                        |                    |      | ≥53 and ≤157                               | HR           | 1.16             | 0.52 | 2.58 |                      |        |             |        | 16   |       |
|                        |                    |      | Per SD (24pmol/L) increase                 | HR           | 1.10             | 0.69 | 1.76 |                      |        |             |        | 53   |       |
| Giovanni<br>Ravaglia   | CSBA               | 2007 | Serum total estradiol                      |              |                  |      |      | dementia             | cohort | Italy       | 376    | 39   | 6     |
|                        |                    |      | As a two-level variable, pg/mL             |              |                  |      |      |                      |        |             |        |      |       |
|                        |                    |      | Low (≤ 22) (ref.)                          | HR           | 1.00             | 1.00 | 1.00 |                      |        |             |        |      |       |
|                        |                    |      | High (≥23)                                 | HR           | 1.00             | 0.51 | 1.93 |                      |        |             |        |      |       |



|                     |                 |      |                                         |      |      |      |          |        |             |                  |    |     |      |    |
|---------------------|-----------------|------|-----------------------------------------|------|------|------|----------|--------|-------------|------------------|----|-----|------|----|
|                     |                 |      | As a three-level variable, pg/mL        |      |      |      |          |        |             |                  |    |     |      |    |
|                     |                 |      | Low (<14) (ref.)                        | HR   | 1.00 | 1.00 | 1.00     |        |             |                  |    |     |      |    |
|                     |                 |      | Intermediate (14–34)                    | HR   | 1.37 | 0.57 | 3.29     |        |             |                  |    |     |      |    |
|                     |                 |      | High (>34)                              | HR   | 0.81 | 0.28 | 2.34     |        |             |                  |    |     |      |    |
| Mirjam I. Geerlings | Rotterdam Study | 2003 | Total estradiol tertiles, pmol/L        |      |      |      | AD       | cohort | Netherlands | 438              |    | 7.5 |      |    |
|                     |                 |      | ≥0.0 and <35 (ref.)                     | HR   | 1.00 | 1.00 |          |        |             |                  |    |     | 1.00 | 15 |
|                     |                 |      | ≥35 and <53                             | HR   | 0.68 | 0.25 |          |        |             |                  |    |     | 1.88 | 11 |
|                     |                 |      | ≥53 and ≤157                            | HR   | 0.82 | 0.29 |          |        |             |                  |    |     | 2.30 | 7  |
|                     |                 |      | Per SD (24 pmol/L) increase             | HR   | 0.8  | 0.47 |          |        |             |                  |    |     | 1.37 | 33 |
| Laure Carcaillon    | 3C              | 2013 | Total estradiol: Tertiles               |      |      |      | AD       | cohort | France      | 413+ 90 dementia | 62 | 6   |      |    |
|                     |                 |      | 1-SD decrease                           | HR   | 1.13 | 0.82 |          |        |             |                  |    |     | 1.55 |    |
|                     |                 |      | 1                                       | HR   | 1.47 | 0.65 |          |        |             |                  |    |     | 3.30 |    |
|                     |                 |      | 2                                       | HR   | 1.03 | 0.40 |          |        |             |                  |    |     | 2.64 |    |
|                     |                 |      | 3 (ref.)                                | HR   | 1.00 | 1.00 |          |        |             |                  |    |     | 1.00 |    |
| Giovanni Ravaglia   | CSBA            | 2007 | Serum total estradiol                   |      |      |      | AD       | cohort | Italy       | 376              | 23 | 6   |      |    |
|                     |                 |      | As a two-level variable, pg/mL          |      |      |      |          |        |             |                  |    |     |      |    |
|                     |                 |      | Low (≤22) (ref.)                        | HR   | 1.00 | 1.00 |          |        |             |                  |    |     | 1.00 |    |
|                     |                 |      | High (≥23)                              | HR   | 0.91 | 0.38 |          |        |             |                  |    |     | 2.18 |    |
|                     |                 |      | As a three-level variable, pg/mL        |      |      |      |          |        |             |                  |    |     |      |    |
|                     |                 |      | Low (<14) (ref.)                        | HR   | 1.00 | 1.00 |          |        |             |                  |    |     | 1.00 |    |
|                     |                 |      | Intermediate (14–34)                    | HR   | 0.94 | 0.32 |          |        |             |                  |    |     | 2.79 |    |
| High (>34)          | HR              | 0.59 | 0.15                                    | 2.37 |      |      |          |        |             |                  |    |     |      |    |
| Mirjam I. Geerlings | Rotterdam Study | 2003 | Bioavailable estradiol tertiles, pmol/L |      |      |      | dementia | cohort | Netherlands | 438              |    | 7.5 |      |    |
|                     |                 |      | ≥0.0 and <27 (ref.)                     | HR   | 1.00 | 1.00 |          |        |             |                  |    |     | 1.00 | 20 |
|                     |                 |      | ≥27 and <41                             | HR   | 0.65 | 0.23 |          |        |             |                  |    |     | 1.87 | 11 |

|                     |                 |      |                                         |    |      |      |      |                   |        |             |      |     |     |    |
|---------------------|-----------------|------|-----------------------------------------|----|------|------|------|-------------------|--------|-------------|------|-----|-----|----|
|                     |                 |      | ≥41 and ≤130                            | HR | 0.91 | 0.36 | 2.28 |                   |        |             |      | 10  |     |    |
|                     |                 |      | Per SD (18pmol/L) increase              | HR | 1.11 | 0.63 | 1.95 |                   |        |             |      | 41  |     |    |
| Mirjam I. Geerlings | Rotterdam Study | 2003 | Bioavailable estradiol tertiles, pmol/L |    |      |      |      | AD                | cohort | Netherlands | 438  |     | 7.5 |    |
|                     |                 |      | ≥0.0 and <27 (ref.)                     | HR | 1.00 | 1.00 | 1.00 |                   |        |             |      |     |     | 13 |
|                     |                 |      | ≥27 and <41                             | HR | 0.85 | 0.25 | 2.90 |                   |        |             |      |     |     | 9  |
|                     |                 |      | ≥41 and ≤130                            | HR | 0.43 | 0.13 | 1.47 |                   |        |             |      |     |     | 3  |
|                     |                 |      | Per SD (18 pmol/L) increase             | HR | 0.74 | 0.37 | 1.48 |                   |        |             |      |     |     | 25 |
| Mirjam I. Geerlings | HAA             | 2006 | Bioavailable estradiol                  | HR | 1.12 | 0.95 | 1.33 | AD                | cohort | Netherlands | 2300 | 134 | 7   |    |
| Majon Muller        | Zoetermeer      | 2008 | Free estradiol, pmol/L                  | OR | 1.50 | 1.00 | 2.40 | cognitive decline | cohort | Netherlands | 218  | 44  | 7   |    |
| Erin S. LeBlanc     | MrOS            | 2010 | Per SD change in free oestradiol        | HR | 1.15 | 0.99 | 1.35 | cognitive decline | cohort | US          | 1001 | NA  | 6   |    |

b) Characteristics of studies with cognitive decline, dementia, and AD by testosterone in male.

| Author           | Project    | Year | Description of risk factor           | RR/OR/<br>HR | Adjusted<br>risk | LCI  | UCI  | Outcome           | design | Country     | Sample | Case | Score |
|------------------|------------|------|--------------------------------------|--------------|------------------|------|------|-------------------|--------|-------------|--------|------|-------|
| Majon Muller     | Zoetermeer | 2008 | Total testosterone nmol/L            | OR           | 1.00             | 0.70 | 1.40 | cognitive decline | cohort | Netherlands | 218    | 44   | 7     |
| Sri Suravarapu   | NA         | 2006 | Testosterone, ng/mL                  |              |                  |      |      | dementia          | cohort | US          | 128    | 21   | 5     |
|                  |            |      | <410                                 | HR           | 2.09             | 0.76 | 5.75 |                   |        |             |        |      |       |
|                  |            |      | ≥410 (ref.)                          | HR           | 1.00             | 1.00 | 1.00 |                   |        |             |        |      |       |
|                  |            |      | Continuous (100 ng/mL increase)      | HR           | 0.95             | 0.72 | 1.26 |                   |        |             |        |      |       |
| Laure Carcaillon | 3C         | 2013 | Total testosterone: tertiles         |              |                  |      |      | dementia          | cohort | France      | 503    | 105  | 6     |
|                  |            |      | 1-SD decrease                        | HR           | 1.16             | 0.87 | 1.54 |                   |        |             |        |      |       |
|                  |            |      | 1                                    | HR           | 2.33             | 1.11 | 4.90 |                   |        |             |        |      |       |
|                  |            |      | 2 (ref.)                             | HR           | 1.00             | 1.00 | 1.00 |                   |        |             |        |      |       |
|                  |            |      | 3                                    | HR           | 1.91             | 0.83 | 4.38 |                   |        |             |        |      |       |
| Andrew H         | HIMS       | 2018 | Total testosterone (per SD decrease) |              |                  |      |      | dementia          | cohort | Australia   | 4069   | 499  | 6     |
|                  |            |      | Q1                                   | HR           | 1.39             | 1.04 | 1.85 |                   |        |             |        |      |       |
|                  |            |      | Q2                                   | HR           | 1.31             | 1.00 | 1.73 |                   |        |             |        |      |       |
|                  |            |      | Q3                                   | HR           | 1.23             | 0.93 | 1.61 |                   |        |             |        |      |       |
|                  |            |      | Q4 (ref.)                            | HR           | 1.00             | 1.00 | 1.00 |                   |        |             |        |      |       |
| Margot Overman   | J UKB      | 2022 | Total testosterone, tertiles         |              |                  |      |      | dementia          | cohort | UK          | 31901  | 208  | 6.5   |
|                  |            |      | Q1 (lowest T)                        | HR           | 1.43             | 1.13 | 1.81 |                   |        |             |        |      |       |
|                  |            |      | Q2                                   | HR           | 1.18             | 0.94 | 1.48 |                   |        |             |        |      |       |
|                  |            |      | Q3                                   | HR           | 1.00             | 0.78 | 1.28 |                   |        |             |        |      |       |
|                  |            |      |                                      |              |                  |      |      |                   | 31871  | 155         |        |      |       |
|                  |            |      |                                      |              |                  |      |      |                   | 31894  | 134         |        |      |       |

|                  |      |      |                                     |    |      |      |      |          |        |        |       |     |     |
|------------------|------|------|-------------------------------------|----|------|------|------|----------|--------|--------|-------|-----|-----|
|                  |      |      | Q4                                  | HR | 1.03 | 0.90 | 1.18 |          |        |        | 31863 | 171 |     |
|                  |      |      | Q5                                  | HR | 1.00 | 1.00 | 1.00 |          |        |        | 31882 | 158 |     |
| Laure Carcaillon | 3C   | 2013 | Total testosterone, tertiles        |    |      |      |      | AD       | cohort | France | 503   | 62  | 6   |
|                  |      |      | 1-SD decrease                       | HR | 1.30 | 0.95 | 1.76 |          |        |        |       |     |     |
|                  |      |      | 1                                   | HR | 3.34 | 1.20 | 9.29 |          |        |        |       |     |     |
|                  |      |      | 2 (ref.)                            | HR | 1.00 | 1.00 | 1.00 |          |        |        |       |     |     |
|                  |      |      | 3                                   | HR | 2.43 | 0.75 | 7.9  |          |        |        |       |     |     |
| S.D. Moffat      | BLSA | 2004 | Total testosterone                  | HR | 1.02 | 0.98 | 1.06 | AD       | cohort | US     | 574   | 54  | 6.5 |
| Margot J Overman | UKB  | 2022 | Total testosterone, tertiles        |    |      |      |      | AD       | cohort | UK     |       |     | 6.5 |
|                  |      |      | Q1 (lowest T)                       | HR | 1.80 | 1.21 | 2.66 |          |        |        |       |     |     |
|                  |      |      | Q2                                  | HR | 1.51 | 1.04 | 2.21 |          |        |        |       |     |     |
|                  |      |      | Q3                                  | HR | 1.08 | 0.72 | 1.64 |          |        |        |       |     |     |
|                  |      |      | Q4                                  | HR | 1.07 | 0.85 | 1.35 |          |        |        |       |     |     |
|                  |      |      | Q5 (ref.)                           | HR | 1.00 | 1.00 | 1.00 |          |        |        |       |     |     |
| Sri Suravarapu   | NA   | 2006 | Bioavailable testosterone, ng/mL    |    |      |      |      | dementia | cohort | US     | 128   | 21  | 5   |
|                  |      |      | <12                                 | HR | 1.22 | 0.38 | 3.87 |          |        |        |       |     |     |
|                  |      |      | ≥12 (ref.)                          | HR | 1.00 | 1.00 | 1.00 |          |        |        |       |     |     |
|                  |      |      | Continuous (5 ng/mL increase)       | HR | 1.11 | 0.63 | 1.97 |          |        |        |       |     |     |
| Laure Carcaillon | 3C   | 2013 | Bioavailable testosterone, tertiles |    |      |      |      | dementia | cohort | France | 503   |     | 6   |
|                  |      |      | 1-SD decrease                       | HR | 1.29 | 1.03 | 1.62 |          |        |        |       |     |     |
|                  |      |      | 1                                   | HR | 2.20 | 1.02 | 4.73 |          |        |        |       |     |     |
|                  |      |      | 2                                   | HR | 1.44 | 0.69 | 3.03 |          |        |        |       |     |     |
|                  |      |      | 3 (ref.)                            | HR | 1.00 | 1.00 | 1.00 |          |        |        |       |     |     |
|                  |      |      |                                     |    |      |      |      |          | 398    | 105    |       |     |     |
|                  |      |      |                                     |    |      |      |      |          | 130    | 44     |       |     |     |
|                  |      |      |                                     |    |      |      |      |          | 135    | 35     |       |     |     |
|                  |      |      |                                     |    |      |      |      |          | 133    | 26     |       |     |     |

|                     |            |      |                                     |    |      |      |      |                   |        |             |      |     |     |
|---------------------|------------|------|-------------------------------------|----|------|------|------|-------------------|--------|-------------|------|-----|-----|
| Mirjam I. Geerlings | HAA        | 2006 | Bioavailable testosterone           | HR | 1.19 | 1.02 | 1.38 | AD                | cohort | Netherlands | 2300 | 134 | 7   |
| Laure Carcaillon    | 3C         | 2013 | Bioavailable testosterone: tertiles |    |      |      |      | AD                | cohort | France      | 503  | 62  | 6   |
|                     |            |      | 1-SD decrease                       | HR | 1.46 | 1.14 | 1.87 |                   |        |             |      |     |     |
|                     |            |      | 1                                   | HR | 2.9  | 1.12 | 7.55 |                   |        |             |      |     |     |
|                     |            |      | 2                                   | HR | 1.91 | 0.69 | 5.32 |                   |        |             |      |     |     |
|                     |            |      | 3 (ref.)                            | HR | 1.00 | 1.00 | 1.00 |                   |        |             |      |     |     |
| Majon Muller        | Zoetermeer | 2008 | Free testosterone, nmol/L           | OR | 0.90 | 0.60 | 1.30 | cognitive decline | cohort | Netherlands | 218  | 44  | 7.5 |
| Erin S. LeBlanc     | MrOS       | 2010 | Per SD change in free testosterone  | HR | 1.07 | 0.87 | 1.31 | cognitive decline | cohort | US          | 1001 | NA  | 6   |
| Giovanni Ravaglia   | CSBA       | 2007 | Serum free testosterone, pg/mL      |    |      |      |      | dementia          | cohort | Italy       | 376  | 39  | 6   |
|                     |            |      | Low ( $\leq 8.1$ ) (ref.)           | HR | 1.00 | 1.00 | 1.00 |                   |        |             |      |     |     |
|                     |            |      | High ( $\leq 8.2$ )                 | HR | 1.40 | 0.72 | 2.73 |                   |        |             |      |     |     |
| Andrew H            | HIMS       | 2018 | Free testosterone (per SD decrease) | HR | 1.18 | 1.06 | 1.31 | dementia          | cohort | Australia   | 4069 | 499 | 6   |
|                     |            |      | Q1                                  | HR | 1.43 | 1.08 | 1.90 |                   |        |             |      |     |     |
|                     |            |      | Q2                                  | HR | 1.32 | 1.00 | 1.74 |                   |        |             |      |     |     |
|                     |            |      | Q3                                  | HR | 1.05 | 0.79 | 1.20 |                   |        |             |      |     |     |
|                     |            |      | Q4 (ref.)                           | HR | 1.00 | 1.00 | 1.00 |                   |        |             |      |     |     |
| S.D. Moffat         | BLSA       | 2004 | Free testosterone index(nMol/nMol)  | HR | 1.06 | 0.88 | 1.29 | dementia          | cohort | US          | 574  | 68  | 6.5 |
| S.D. Moffat         | BLSA       | 2004 | Free testosterone index(nMol/nMol)  | HR | 0.74 | 0.57 | 0.96 | AD                | cohort | US          | 574  | 54  | 6.5 |
|                     | CSBA       | 2007 | Serum free testosterone, pg/mL      |    |      |      |      | AD                | cohort | Italy       | 376  | 23  | 6   |

|          |  |  |                           |    |      |      |      |  |  |  |  |  |  |
|----------|--|--|---------------------------|----|------|------|------|--|--|--|--|--|--|
| Giovanni |  |  | Low ( $\leq 8.1$ ) (ref.) | HR | 1.00 | 1.00 | 1.00 |  |  |  |  |  |  |
| Ravaglia |  |  | High ( $\leq 8.2$ )       | HR | 1.13 | 0.47 | 2.71 |  |  |  |  |  |  |

c) Characteristics of studies with cognitive decline, dementia, and AD by estrone, SHBG, LH, dihydrotestosterone in male.

| Author          | Project    | Year | Description of risk factor            | RR/OR/<br>HR | Adjusted<br>risk | LCI  | UCI  | Outcome           | design | Country     | Sample | Case | Score |
|-----------------|------------|------|---------------------------------------|--------------|------------------|------|------|-------------------|--------|-------------|--------|------|-------|
| Majon Muller    | Zoetermeer | 2008 | Estrone, pmol/L                       | OR           | 1.20             | 0.80 | 1.80 | cognitive decline | cohort | Netherlands | 218    | 44   | 7     |
| Erin S. LeBlanc | MrOS       | 2010 | per SD change in SHBG                 | HR           | 1.25             | 1.06 | 1.49 | cognitive decline | cohort | US          | 1001   | NA   | 6     |
| Andrew H        | HIMS       | 2018 | SHBG (per SD decrease)                | HR           | 1.08             | 0.98 | 1.18 | dementia          | cohort | Australia   | 4069   | 499  | 6     |
|                 |            |      | Q1(ref.)                              | HR           | 1.00             | 1.00 | 1.00 |                   |        |             |        |      |       |
|                 |            |      | Q2                                    | HR           | 1.07             | 0.79 | 1.44 |                   |        |             |        |      |       |
|                 |            |      | Q3                                    | HR           | 1.27             | 0.95 | 1.68 |                   |        |             |        |      |       |
|                 |            |      | Q4                                    | HR           | 1.27             | 0.95 | 1.71 |                   |        |             |        |      |       |
| Majon Muller    | Manhattan  | 2010 | SHBG per S.D.(22.9nmol/L)             | HR           | 1.20             | 0.90 | 1.80 | dementia          | cohort | US          | 217    | 50   | 6     |
| Majon Muller    | Manhattan  | 2010 | SHBG per S.D.(22.9nmol/L)             | HR           | 1.30             | 1.00 | 2.00 | AD                | cohort | US          | 217    | 33   | 6     |
| Andrew H        | HIMS       | 2018 | Luteinizing hormone (per SD decrease) | HR           | 1.10             | 1.01 | 1.20 | dementia          | cohort | Australia   | 4069   | 499  | 6     |
|                 |            |      | Q1 (ref.)                             | HR           | 1.00             | 1.00 | 1.00 |                   |        |             |        |      |       |
|                 |            |      | Q2                                    | HR           | 1.01             | 0.76 | 1.32 |                   |        |             |        |      |       |
|                 |            |      | Q3                                    | HR           | 0.96             | 0.73 | 1.26 |                   |        |             |        |      |       |
|                 |            |      | Q4                                    | HR           | 1.08             | 0.82 | 1.41 |                   |        |             |        |      |       |
| Margot Overman  | UKB        | 2022 | SHBG                                  |              |                  |      |      | dementia          | cohort | UK          |        |      | 6.5   |
|                 |            |      | Q1                                    | HR           | 0.66             | 0.51 | 0.85 |                   |        |             | 29,516 | 125  |       |
|                 |            |      | Q2                                    | HR           | 0.70             | 0.55 | 0.89 |                   |        |             | 29,523 | 124  |       |
|                 |            |      | Q3                                    | HR           | 0.67             | 0.52 | 0.85 |                   |        |             | 29,508 | 120  |       |
|                 |            |      | Q4                                    | HR           | 0.76             | 0.66 | 0.88 |                   |        |             | 29,513 | 175  |       |

|                  |            |      |                                       |    |      |      |      |                   |        |             |        |     |     |
|------------------|------------|------|---------------------------------------|----|------|------|------|-------------------|--------|-------------|--------|-----|-----|
|                  |            |      | Q5 (ref.)                             | HR | 1.00 | 1.00 | 1.00 |                   |        |             | 29,500 | 224 |     |
| Margot J Overman | UKB        | 2022 | SHBG                                  |    |      |      |      | AD                | cohort | UK          |        |     | 6.5 |
|                  |            |      | Q1                                    | HR | 0.53 | 0.34 | 0.84 |                   |        |             | 29,516 | 38  |     |
|                  |            |      | Q2                                    | HR | 0.72 | 0.49 | 1.07 |                   |        |             | 29,523 | 43  |     |
|                  |            |      | Q3                                    | HR | 0.66 | 0.44 | 0.99 |                   |        |             | 29,508 | 46  |     |
|                  |            |      | Q4                                    | HR | 0.75 | 0.59 | 0.95 |                   |        |             | 29,513 | 64  |     |
|                  |            |      | Q5 (ref.)                             | HR | 1.00 | 1.00 | 1.00 |                   |        |             | 29,500 | 79  |     |
| Andrew H         | HIMS       | 2018 | Dihydrotestosterone (per SD decrease) | HR | 1.09 | 0.97 | 1.20 | dementia          | cohort | Australia   | 4069   | 499 | 6   |
|                  |            |      | Q1                                    | HR | 1.20 | 0.90 | 1.59 |                   |        |             |        |     |     |
|                  |            |      | Q2                                    | HR | 1.22 | 0.93 | 1.59 |                   |        |             |        |     |     |
|                  |            |      | Q3                                    | HR | 1.07 | 0.81 | 1.40 |                   |        |             |        |     |     |
|                  |            |      | Q4 (ref.)                             | HR | 1.00 | 1.00 | 1.00 |                   |        |             |        |     |     |
| Majon Muller     | Zoetermeer | 2008 | Estrone (pmol/L)                      | OR | 1.20 | 0.80 | 1.80 | cognitive decline | cohort | Netherlands | 218    | 44  | 7   |

Abbreviations: ACD: all cause dementia, AD: Alzheimer's disease, ADT: androgen deprivation therapy, BPH: benign prostate hyperplasia, DHEA: Dehydroepiandrosterone, E: estradiol, GnRHa: gonadotropin-releasing hormone agonist, HR, hazard ratios, HT: hormone therapy, LH-RH: luteinizing hormone releasing hormone, NPR: fetal growth restriction, OR: odd ratio, PPRM: premature rupture of membranes, RT: radiotherapy, SD: standard deviation, SHBG: sex hormone binding globulin, SLE: systemic lupus erythematosus, T: testosterone, WW: watchful waiting.



Appendix H Results of dose-response analysis between certain factors and relative risks of dementia or cognitive decline.

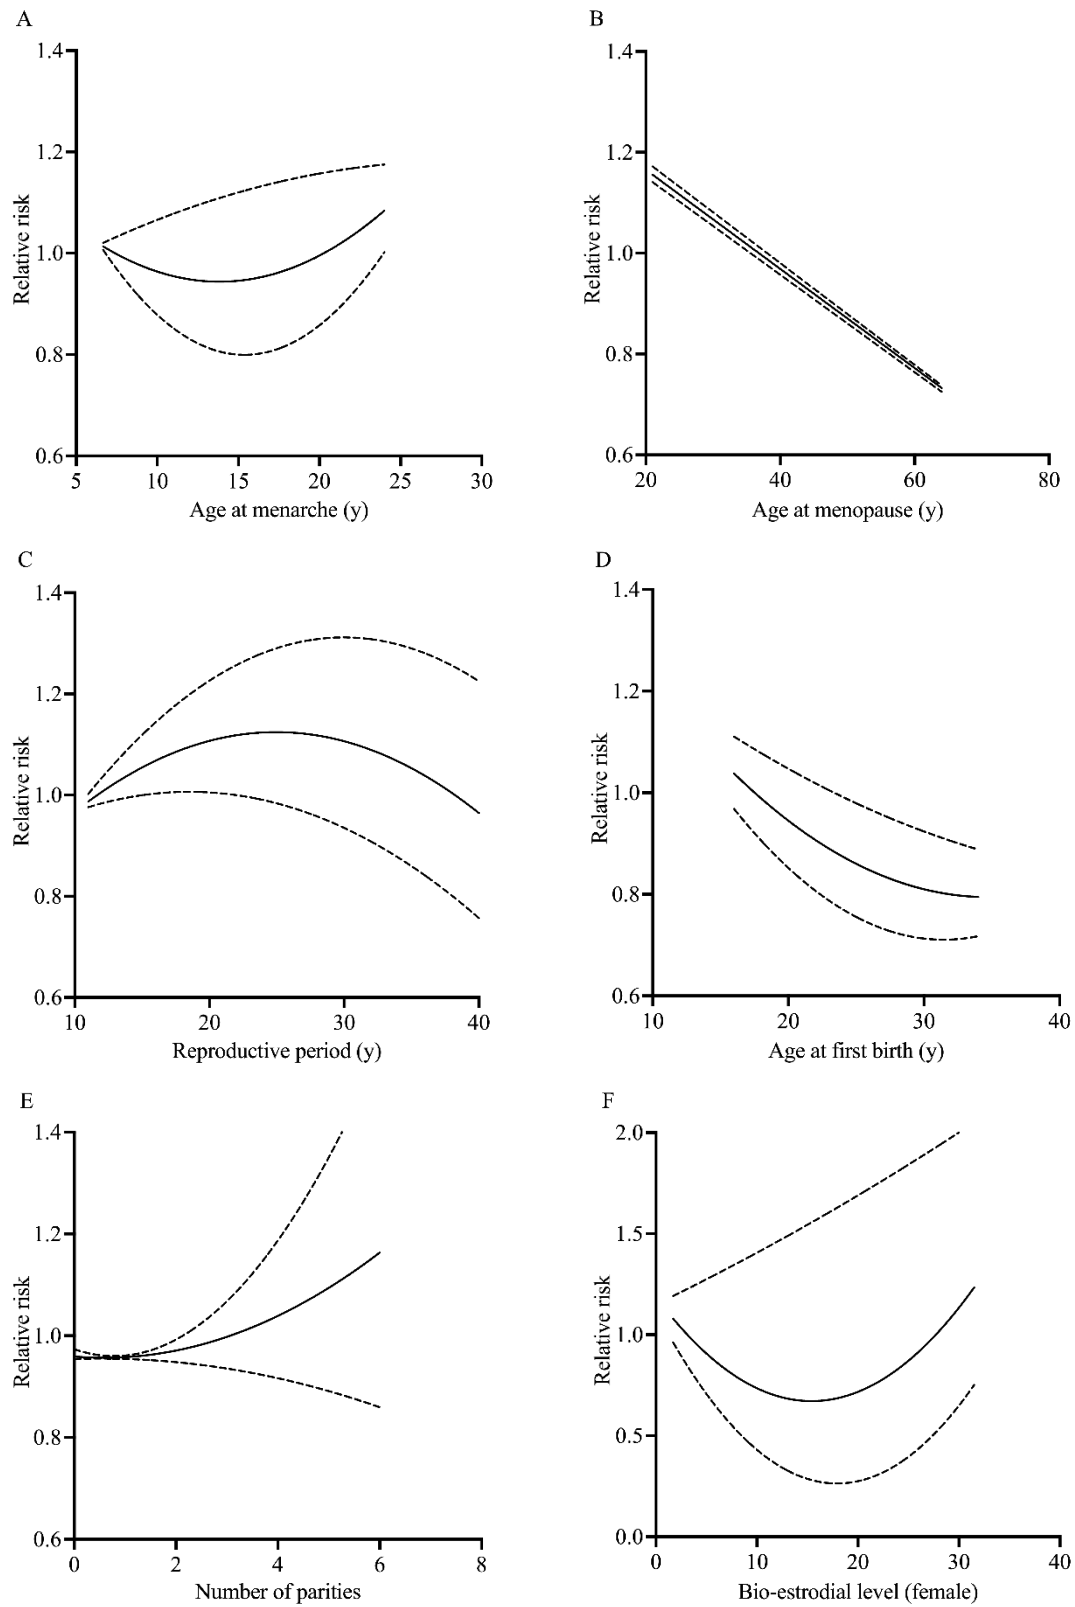

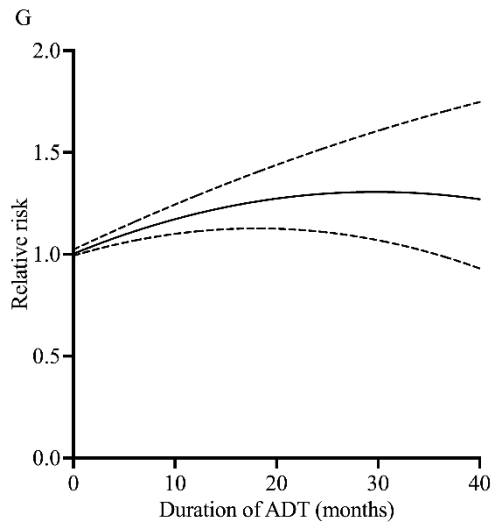

## Appendix I Results of subgroup analysis on ADT.

### 1. Subgroup analysis between races.

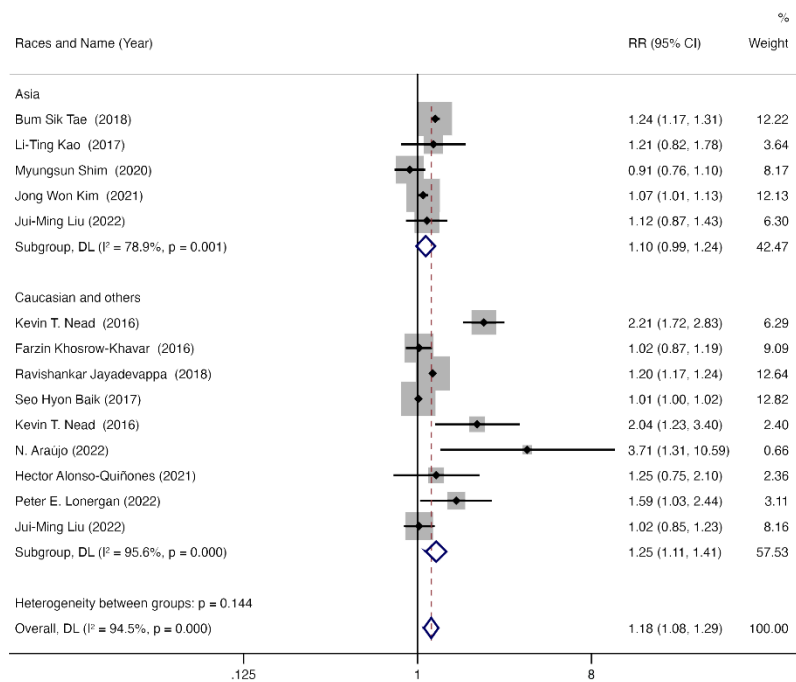

## 2. Subgroup analysis between mean follow-up years.

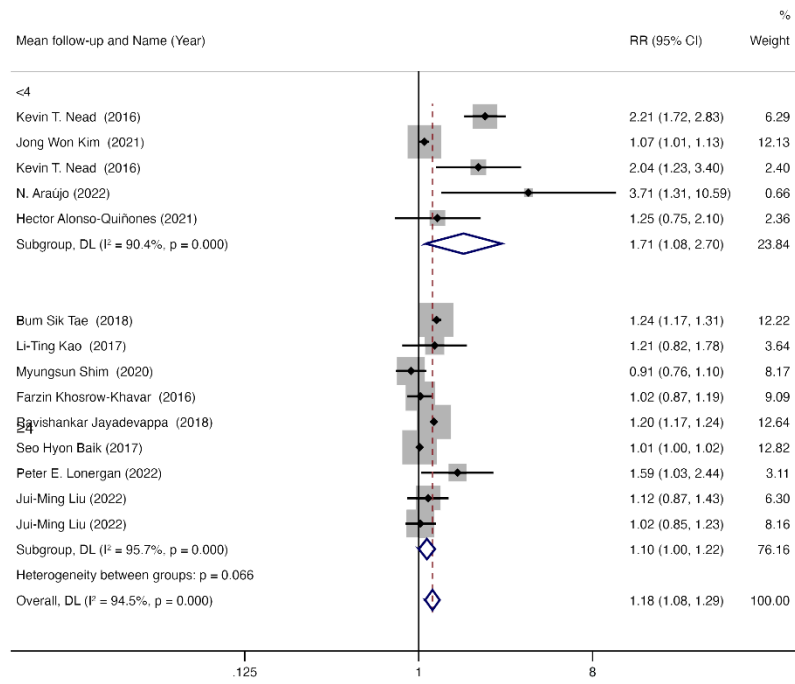

### 3. Subgroup analysis between sample sizes.

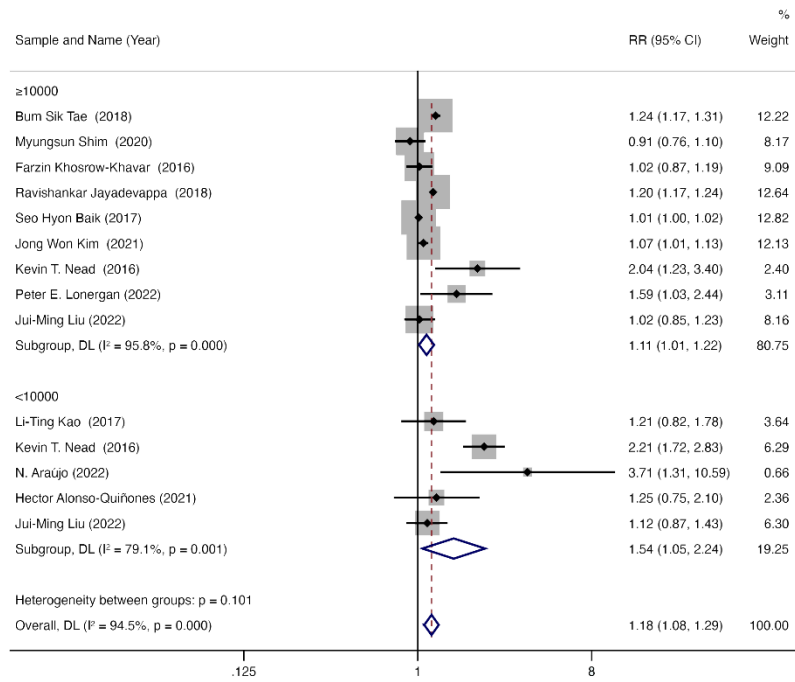

#### 4. Subgroup analysis between NOS scores.

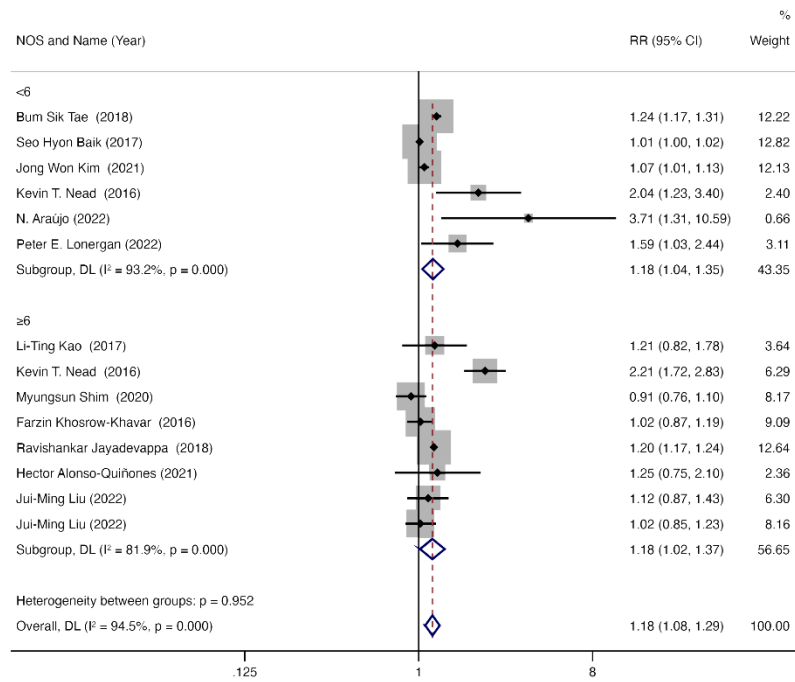

Appendix J Detailed GRADE score on credibility of the meta-analysis on dementia or cognitive decline.

| Risk factors                   | No. | Sample    | RR (95%CI)         | Effect size                                                                         | ROB                                                                                   | Inconsist.                                                                            | Imprecis.                                                                             | Indirect.                                                                             | Pub. bias                                                                             | GEADE certainty of evidence |
|--------------------------------|-----|-----------|--------------------|-------------------------------------------------------------------------------------|---------------------------------------------------------------------------------------|---------------------------------------------------------------------------------------|---------------------------------------------------------------------------------------|---------------------------------------------------------------------------------------|---------------------------------------------------------------------------------------|-----------------------------|
| Early menarche                 | 8   | 4,721,518 | 1.04 (0.94 - 1.11) |    |    |    |    |    |    | ⊕○○○<br>Very low            |
| Late menarche                  | 4   | 4,711,662 | 1.15 (1.14 - 1.17) |    |    |    |    |    |    | ⊕○○○<br>Very low            |
| Age at menarche (per year)     | 5   | 22,597    | 1.01 (0.98 - 1.04) |    |    |    |    |    |    | ⊕○○○<br>Very low            |
| Early menopause                | 7   | 4,722,798 | 1.22 (1.11 - 1.34) |    |    |    |    |    |    | ⊕○○○<br>Very low            |
| Late menopause                 | 5   | 4,984,363 | 0.93 (0.91 - 0.96) |    |    |    |    |    |    | ⊕○○○<br>Very low            |
| Age at menopause (per year)    | 7   | 24,883    | 0.99 (0.97 - 1.02) |    |    |    |    |    |    | ⊕○○○<br>Very low            |
| Short reproductive period      | 8   | 307,531   | 1.14 (1.05 - 1.24) |    |    |    |    |    |    | ⊕○○○<br>Very low            |
| Long reproductive period       | 7   | 293,352   | 0.91 (0.83 - 0.99) |    |   |   |   |   |   | ⊕○○○<br>Very low            |
| Reproductive period (per year) | 4   | 20,155    | 0.99 (0.97 - 1.02) |  |  |  |  |  |  | ⊕○○○<br>Very low            |
| Early childbearing             | 5   | 291,757   | 1.07 (0.96 - 1.19) |  |  |  |  |  |  | ⊕○○○<br>Very low            |
| Late childbearing              | 4   | 282,882   | 1.03 (0.88 - 1.22) |  |  |  |  |  |  | ⊕○○○<br>Very low            |

|                         |    |           |                    |                                                                                     |                                                                                       |                                                                                       |                                                                                       |                                                                                       |                                                                                       |                  |
|-------------------------|----|-----------|--------------------|-------------------------------------------------------------------------------------|---------------------------------------------------------------------------------------|---------------------------------------------------------------------------------------|---------------------------------------------------------------------------------------|---------------------------------------------------------------------------------------|---------------------------------------------------------------------------------------|------------------|
| Nulliparous             | 10 | 4,752,597 | 1.11 (1.06 - 1.16) |    |    |    |    |    |    | ⊕○○○<br>Very low |
| Grand multiparity       | 5  | 37,203    | 1.31 (1.18 - 1.47) |    |    |    |    |    |    | ⊕○○○<br>Very low |
| Number of parities      | 3  | 18,052    | 1.03 (1.01 - 1.05) |    |    |    |    |    |    | ⊕○○○<br>Very low |
| 1 miscarriage           | 3  | 1,520,746 | 0.95 (0.87 - 1.03) |    |    |    |    |    |    | ⊕○○○<br>Very low |
| ≥2 miscarriages         | 5  | 2,654,251 | 1.01 (0.91 - 1.11) |    |    |    |    |    |    | ⊕○○○<br>Very low |
| Breastfeeding           | 3  | 4,698,115 | 1.10 (0.96 - 1.26) |    |    |    |    |    |    | ⊕○○○<br>Very low |
| Breastfeeding duration  | 3  | 4,703,484 | 1.04 (0.86 - 1.25) |    |    |    |    |    |    | ⊕○○○<br>Very low |
| Surgical menopause      | 5  | 10,546    | 1.07 (0.93 - 1.23) |    |    |    |    |    |    | ⊕○○○<br>Very low |
| Bilateral oophorectomy  | 5  | 2,379,710 | 1.08 (1.02 - 1.15) |    |    |    |    |    |    | ⊕○○○<br>Very low |
| Hysterectomy            | 5  | 2,631,275 | 1.01 (0.91 - 1.12) |   |   |   |   |   |   | ⊕○○○<br>Very low |
| Any oophorectomy        | 3  | 314,287   | 1.08 (0.82 - 1.41) |  |  |  |  |  |  | ⊕○○○<br>Very low |
| Unilateral oophorectomy | 3  | 2,341,200 | 1.12 (0.81 - 1.55) |  |  |  |  |  |  | ⊕○○○<br>Very low |
| Preeclampsia            | 3  | 1,128,709 | 0.85 (0.61 - 1.19) |  |  |  |  |  |  | ⊕○○○<br>Very low |



|                                   |    |           |                    |  |  |  |  |  |  |                  |
|-----------------------------------|----|-----------|--------------------|--|--|--|--|--|--|------------------|
| Total estradiol in female         | 5  | 6,704     | 1.26 (0.69 - 2.30) |  |  |  |  |  |  | ⊕○○○<br>Very low |
| Bioavailable estradiol in female  | 4  | 6,395     | 0.70 (0.27 - 1.78) |  |  |  |  |  |  | ⊕○○○<br>Very low |
| ADT*                              | 13 | 2,727,291 | 1.18 (1.08 - 1.29) |  |  |  |  |  |  | ⊕○○○<br>Very low |
| GnRH agonist*                     | 4  | 70,442    | 0.97 (0.86 - 1.09) |  |  |  |  |  |  | ⊕○○○<br>Very low |
| Total estradiol in male           | 5  | 5,604     | 0.98 (0.71 - 1.37) |  |  |  |  |  |  | ⊕○○○<br>Very low |
| Total testosterone in male        | 6  | 164,913   | 0.88 (0.74 - 1.04) |  |  |  |  |  |  | ⊕○○○<br>Very low |
| Bioavailable testosterone in male | 4  | 7,000     | 0.93 (0.67 - 1.29) |  |  |  |  |  |  | ⊕○○○<br>Very low |
| Free testosterone in male         | 5  | 6,238     | 0.97 (0.81 - 1.17) |  |  |  |  |  |  | ⊕○○○<br>Very low |
| SHBG in male                      | 5  | 165,272   | 1.22 (1.06 - 1.39) |  |  |  |  |  |  | ⊕○○○<br>Very low |

= high concerns    = some concerns    = no concerns

= small ( $0.75 < RR < 1.25$ )

= general ( $1.25 \leq RR < 2$ ) or ( $0.5 < RR \leq 0.75$ )

= large ( $2 \leq RR < 5$ ) or ( $0.2 < RR \leq 0.5$ )

Note: High certainty: We are very confident that the true effect lies close to that of the estimate of the effect. Moderate certainty: We are moderately confident in the effect estimate--the true effect is likely to be close to the estimate of the effect, but there is a possibility that it is substantially different. Low certainty: Our confidence in the effect estimate is limited- the true effect may be substantially different from the estimate of the effect.

Abbreviations: RR, adjusted relative risk; No, number of studies in pooled meta-analysis for each outcome; ROB, risk of bias; Inconsist, inconsistency; Imprecis, imprecision; Indirect, indirectness; Pub. Bias, publication bias.

Appendix K Results of the systemic reviews.

1. Results of the systemic reviews on female-specific reproductive factors.

| Factors            | Author                   | Year | Fits with the results of meta-analysis or not | NOS |
|--------------------|--------------------------|------|-----------------------------------------------|-----|
| Increased total-E2 | Elizabeth Barrett-Connor | 1999 | No                                            | 5.5 |
|                    | Joanne Ryan              | 2012 | No                                            | 5.5 |
|                    | Gail A. Laughlin         | 2010 | No                                            | 5.5 |
|                    | Kristine Yaffe           | 1998 | No                                            | 3.5 |
|                    | Mirjam I. Geerlings      | 2002 | Yes                                           | 7.5 |
|                    | Laure Carcaillon         | 2014 | No                                            | 7   |
|                    | Giovanni Ravaglia        | 2007 | Yes                                           | 6   |
| Increased bio-E2   | Elizabeth Barrett-Connor | 1999 | Yes                                           | 5.5 |
|                    | Gail A. Laughlin         | 2010 | No                                            | 5.5 |
|                    | Kristine Yaffe           | 2010 | Yes                                           | 6.5 |
|                    | K. Yaffe                 | 2006 | Yes                                           | 5.5 |
|                    | Mirjam I. Geerlings      | 2002 | No                                            | 7.5 |
|                    | Laure Carcaillon         | 2014 | Yes                                           | 7   |
| Increased estrone  | Elizabeth Barrett-Connor | 1999 | Yes                                           | 5.5 |
|                    | Joanne Ryan              | 2012 | Yes                                           | 5.5 |
|                    | Kristine Yaffe           | 1998 | Yes                                           | 3.5 |
| Increased total-T  | Elizabeth Barrett-Connor | 1999 | Yes                                           | 5.5 |
|                    | Joanne Ryan              | 2012 | Yes                                           | 5.5 |
|                    | Kristine Yaffe           | 2010 | Yes                                           | 6.5 |
|                    | Laure Carcaillon         | 2014 | Yes                                           | 7   |
| Increased free E2  | Joanne Ryan              | 2012 | Yes                                           | 5.5 |
|                    | Kristine Yaffe           | 2010 | Yes                                           | 6.5 |
| (Pre)eclampsia     | Ineke R. Postma          | 2016 | Yes                                           | 4   |
|                    | Ellika Andolf            | 2020 | Yes                                           | 5.5 |
|                    | Ellika G Andolf          | 2007 | Yes                                           | 7.5 |
|                    | Saima Basit              | 2018 | No                                            | 7   |
|                    | Lina Bergman             | 2021 | Yes                                           | 5   |
| Nulliparous        | Sanna L. Read            | 2017 | Yes                                           | 6   |
|                    | Emily W. Harville        | 2019 | Yes                                           | 4.5 |
|                    | Xingyue Song             | 2020 | No                                            | 7.5 |
|                    | Joanne Ryan              | 2009 | No                                            | 4.5 |
|                    | Natalie L. Rasgon        | 2005 | No                                            | 6   |
|                    | Fu-Dong Li               | 2015 | No                                            | 6   |
|                    | Hyesue Jang              | 2018 | Yes                                           | 5.5 |
|                    | Martin J. Prince         | 2018 | No                                            | 5.5 |
|                    | A. Paganini-Hill         | 2020 | No                                            | 5.5 |
|                    | Jong Bin Bae             | 2020 | No                                            | 5.5 |
|                    | Jung Eun Yoo             | 2020 | Yes                                           | 7   |
|                    | Joseph L. Saenz          | 2021 | Yes                                           | 5   |

|                                |                        |      |     |     |
|--------------------------------|------------------------|------|-----|-----|
| Early age at first birth       | Emily W. Harville      | 2019 | Yes | 4.5 |
|                                | Xingyue Song           | 2020 | Yes | 7.5 |
|                                | Joanne Ryan            | 2009 | Yes | 4.5 |
|                                | A. Paganini-Hill       | 2020 | Yes | 5.5 |
|                                | Jessica Gong           | 2022 | No  | 6.5 |
|                                | Alison Gemmill         | 2022 | Yes | 5.5 |
| Fetal growth restriction       | Emily W. Harville      | 2019 | Yes | 4.5 |
|                                | Ellika Andolf          | 2020 | Yes | 5.5 |
| Preterm birth                  | Emily W. Harville      | 2019 | Yes | 4.5 |
|                                | Ellika Andolf          | 2020 | Yes | 5.5 |
| Gestational diabetes           | Emily W. Harville      | 2019 | Yes | 4.5 |
|                                | Ellika Andolf          | 2020 | Yes | 5.5 |
| Pregnancy induced hypertension | Emily W. Harville      | 2019 | Yes | 4.5 |
|                                | Carolien N.H. Abheiden | 2015 | Yes | 4.5 |
|                                | Michelle M. Mielke     | 2016 | No  | 5   |
|                                | Ellika Andolf          | 2020 | Yes | 5.5 |
|                                | M Nelander             | 2017 | Yes | 6.5 |
| Miscarriage                    | Emily W. Harville      | 2019 | Yes | 4.5 |
|                                | Sujarwoto Sujarwoto    | 2019 | Yes | 6   |
|                                | Hyesue Jang            | 2018 | Yes | 5.5 |
|                                | Saima Basit,           | 2019 | Yes | 6   |
|                                | Jessica Gong           | 2022 | Yes | 6.5 |
| Breastfeeding (ever)           | Emily W. Harville      | 2019 | No  | 4.5 |
|                                | Hyeue Jang             | 2018 | Yes | 5.5 |
|                                | Yoko Shimizu           | 2019 | Yes | 7   |
|                                | Jung Eun Yoo           | 2020 | Yes | 7   |
| Reproductive period (per year) | Hung-Tse Chou          | 2021 | Yes | 5   |
|                                | L.-F. Low              | 2005 | Yes | 6   |
|                                | Xingyue Song           | 2020 | Yes | 7.5 |
|                                | Fu-Dong Li             | 2015 | Yes | 6   |
|                                | Hyesue Jang            | 2018 | Yes | 5.5 |
|                                | Mirjam I. Geerlings    | 2001 | No  | 6.5 |
| Irregular menstrual cycle      | Hung-Tse Chou          | 2021 | Yes | 5   |
|                                | Yoko Shimizu           | 2019 | Yes | 7.5 |
|                                | Fu-Dong Li             | 2015 | Yes | 7   |
| Breastfeeding (months)         | Hung-Tse Chou          | 2021 | Yes | 5   |
|                                | Michelle Heys          | 2010 | No  | 5   |
|                                | Fu-Dong Li             | 2015 | No  | 7   |
|                                | Jung Eun Yoo           | 2020 | No  | 7   |
|                                | Jenna Najar            | 2020 | Yes | 7   |
| Surgical menopause             | Keiko Kurita           | 2016 | Yes | 6   |
|                                | Yoko Shimizu           | 2019 | Yes | 7.5 |
|                                | Joanne Ryan            | 2009 | Yes | 4.5 |

|                                      |                     |      |     |     |
|--------------------------------------|---------------------|------|-----|-----|
|                                      | J Ryan              | 2014 | Yes | 7   |
|                                      | A. Paganini-Hill    | 2020 | Yes | 5.5 |
|                                      | Mirjam I. Geerlings | 2001 | Yes | 6.5 |
| Per 1 increase in number of parities | Hung-Tse Chou       | 2021 | Yes | 5   |
|                                      | Michelle Heys       | 2010 | Yes | 5   |
|                                      | Sujarwoto Sujarwoto | 2019 | No  | 6   |
|                                      | Chiara Zucchella    | 2012 | No  | 6   |
|                                      | Molly Fox           | 2018 | No  | 7   |
|                                      | Xingyue Song        | 2020 | Yes | 7.5 |
|                                      | Martin J. Prince    | 2018 | Yes | 5.5 |
|                                      | Jenna Najjar        | 2020 | No  | 7   |
| Early menopause                      | Sujarwoto Sujarwoto | 2019 | Yes | 6   |
|                                      | Chiara Zucchella    | 2012 | Yes | 6   |
|                                      | Yoko Shimizu        | 2019 | No  | 7.5 |
|                                      | Xingyue Song        | 2020 | Yes | 7.5 |
|                                      | J Ryan              | 2014 | No  | 7   |
|                                      | Natalie L. Rasgon   | 2005 | Yes | 6   |
|                                      | Jung Eun Yoo        | 2020 | Yes | 7   |
|                                      | Paola Gilsanz       | 2019 | Yes | 7   |
|                                      | A. Paganini-Hill    | 2020 | No  | 5.5 |
| Early menarche                       | Sujarwoto Sujarwoto | 2019 | Yes | 6   |
|                                      | Yoko Shimizu        | 2019 | Yes | 7.5 |
|                                      | Xingyue Song        | 2020 | Yes | 7.5 |
|                                      | Natalie L. Rasgon   | 2005 | Yes | 6   |
|                                      | Jung Eun Yoo        | 2020 | No  | 7   |
|                                      | Paola Gilsanz       | 2019 | Yes | 7   |
|                                      | Mirjam I. Geerlings | 2001 | Yes | 6.5 |
|                                      | A. Paganini-Hill    | 2020 | Yes | 5.5 |
|                                      | Jessica Gong        | 2022 | No  | 6.5 |
| Stillbirth                           | Sujarwoto Sujarwoto | 2019 | Yes | 6   |
|                                      | Saima Basit,        | 2019 | Yes | 5.5 |
|                                      | Jessica Gong        | 2022 | Yes | 6   |
| Late menopause                       | Robert N. McLay     | 2003 | No  | 5.5 |
|                                      | Xingyue Song        | 2020 | No  | 7.5 |
|                                      | Natalie L. Rasgon   | 2005 | No  | 6   |
|                                      | Jung Eun Yoo        | 2020 | Yes | 7   |
|                                      | A. Paganini-Hill    | 2020 | No  | 5.5 |
| Long reproductive period             | Michelle Heys       | 2010 | Yes | 5   |
|                                      | Chiara Zucchella    | 2012 | Yes | 6   |
|                                      | Yoko Shimizu        | 2019 | No  | 7.5 |
|                                      | Xingyue Song        | 2020 | No  | 7.5 |
|                                      | Natalie L. Rasgon   | 2005 | No  | 6   |
|                                      | Mirjam I. Geerlings | 2001 | No  | 6.5 |

|               |                  |      |     |     |
|---------------|------------------|------|-----|-----|
|               | Jenna Najjar     | 2020 | No  | 7   |
|               | A. Paganini-Hill | 2020 | No  | 5.5 |
|               | Jessica Gong     | 2022 | No  | 6.5 |
| Late menarche | Hung-Tse Chou    | 2021 | Yes | 5   |
|               | Chiara Zucchella | 2012 | Yes | 6   |
|               | Yoko Shimizu     | 2019 | No  | 7.5 |
|               | Xingyue Song     | 2020 | No  | 7.5 |
|               | Jung Eun Yoo     | 2020 | Yes | 7   |
|               | Paola Gilsanz    | 2019 | Yes | 7   |

2. Results of the systemic reviews on male-specific reproductive factors.

| Factors            | Author                   | Year | Fits with the results of meta-analysis or not | NOS |
|--------------------|--------------------------|------|-----------------------------------------------|-----|
| ADT                | Vanessa Sánchez-Martínez | 2021 | No                                            | 3.5 |
|                    | Kohei Okamoto            | 2015 | Yes                                           | 3.5 |
|                    | Bulent Gunlusoy, Assoc   | 2016 | No                                            | 5   |
|                    | Juan Morote              | 2017 | Yes                                           | 3   |
|                    | Onder Cinar              | 2021 | Yes                                           | 4.5 |
|                    | Yasin Ceylan             | 2019 | No                                            | 5   |
|                    | Shabbir M.H. Alibhai     | 2016 | Yes                                           | 6   |
|                    | Supriya Gupta Mohile     | 2010 | Yes                                           | 3.5 |
|                    | Bum Sik Tae              | 2018 | No                                            | 5.5 |
|                    | Li-Ting Kao              | 2017 | Yes                                           | 7   |
|                    | Kevin T. Nead            | 2016 | No                                            | 7   |
|                    | Myungsun Shim            | 2020 | Yes                                           | 6   |
|                    | Farzin Khosrow-Khavar    | 2016 | Yes                                           | 7   |
|                    | Ravishankar Jayadevappa  | 2018 | No                                            | 7   |
|                    | Seo Hyon Baik            | 2017 | No                                            | 5   |
|                    | Jong Won Kim             | 2021 | No                                            | 4   |
|                    | Kevin T. Nead            | 2016 | No                                            | 5   |
|                    | N. Araújo                | 2022 | No                                            | 5   |
|                    | Hector Alonso-Quñones    | 2021 | Yes                                           | 8   |
|                    | Peter E. Lonergan        | 2022 | No                                            | 4   |
| Jui-Ming Liu       | 2022                     | Yes  | 6                                             |     |
| Onder Cinar        | 2021                     | No   | 8                                             |     |
| Karl H. Tully      | 2019                     | Yes  | 5                                             |     |
| Increased total-T  | Elizabeth Barrett-Connor | 1999 | Yes                                           | 5   |
|                    | Lessov-Schlaggar, C. N.  | 2005 | Yes                                           | 5   |
|                    | Majon Muller             | 2008 | Yes                                           | 7   |
|                    | Sri Suravarapu           | 2006 | Yes                                           | 5   |
|                    | Laure Carcaillon         | 2013 | Yes                                           | 6   |
|                    | Andrew H                 | 2018 | No                                            | 6   |
|                    | S.D. Moffat              | 2004 | Yes                                           | 6.5 |
|                    | Margot J Overman         | 2022 | Yes                                           | 6.5 |
| Increased bio-T    | Elizabeth Barrett-Connor | 1999 | Yes                                           | 5   |
|                    | Sri Suravarapu           | 2006 | Yes                                           | 5   |
|                    | Laure Carcaillon         | 2013 | No                                            | 6   |
|                    | Andrew H                 | 2018 | Yes                                           | 6   |
|                    | Mirjam I. Geerlings      | 2006 | No                                            | 7   |
| Increased total-E2 | Elizabeth Barrett-Connor | 1999 | Yes                                           | 5   |
|                    | Lessov-Schlaggar, C. N.  | 2005 | No                                            | 5   |
|                    | Majon Muller             | 2008 | No                                            | 7   |
|                    | Laure Carcaillon         | 2013 | Yes                                           | 6   |

|                  |                          |      |     |     |
|------------------|--------------------------|------|-----|-----|
|                  | Andrew H                 | 2018 | No  | 6   |
|                  | Mirjam I. Geerlings      | 2002 | Yes | 7.5 |
|                  | Giovanni Ravaglia        | 2007 | Yes | 6   |
| Increased bio-E2 | Elizabeth Barrett-Connor | 1999 | Yes | 5   |
|                  | Mirjam I. Geerlings      | 2002 | Yes | 7.5 |
|                  | Mirjam I. Geerlings      | 2006 | Yes | 7   |
| Increased SHBG   | Lessov-Schlaggar, C. N.  | 2005 | No  | 5   |
|                  | Erin S. LeBlanc          | 2010 | Yes | 6   |
|                  | Andrew H                 | 2018 | No  | 6   |
|                  | Majon Muller             | 2010 | No  | 6   |
|                  | S.D. Moffat              | 2004 | No  | 6.5 |
|                  | Margot J Overman         | 2022 | Yes | 6.5 |



Appendix L Results of index S divergence.

1. Results of index S divergence in female-specific reproductive factors.

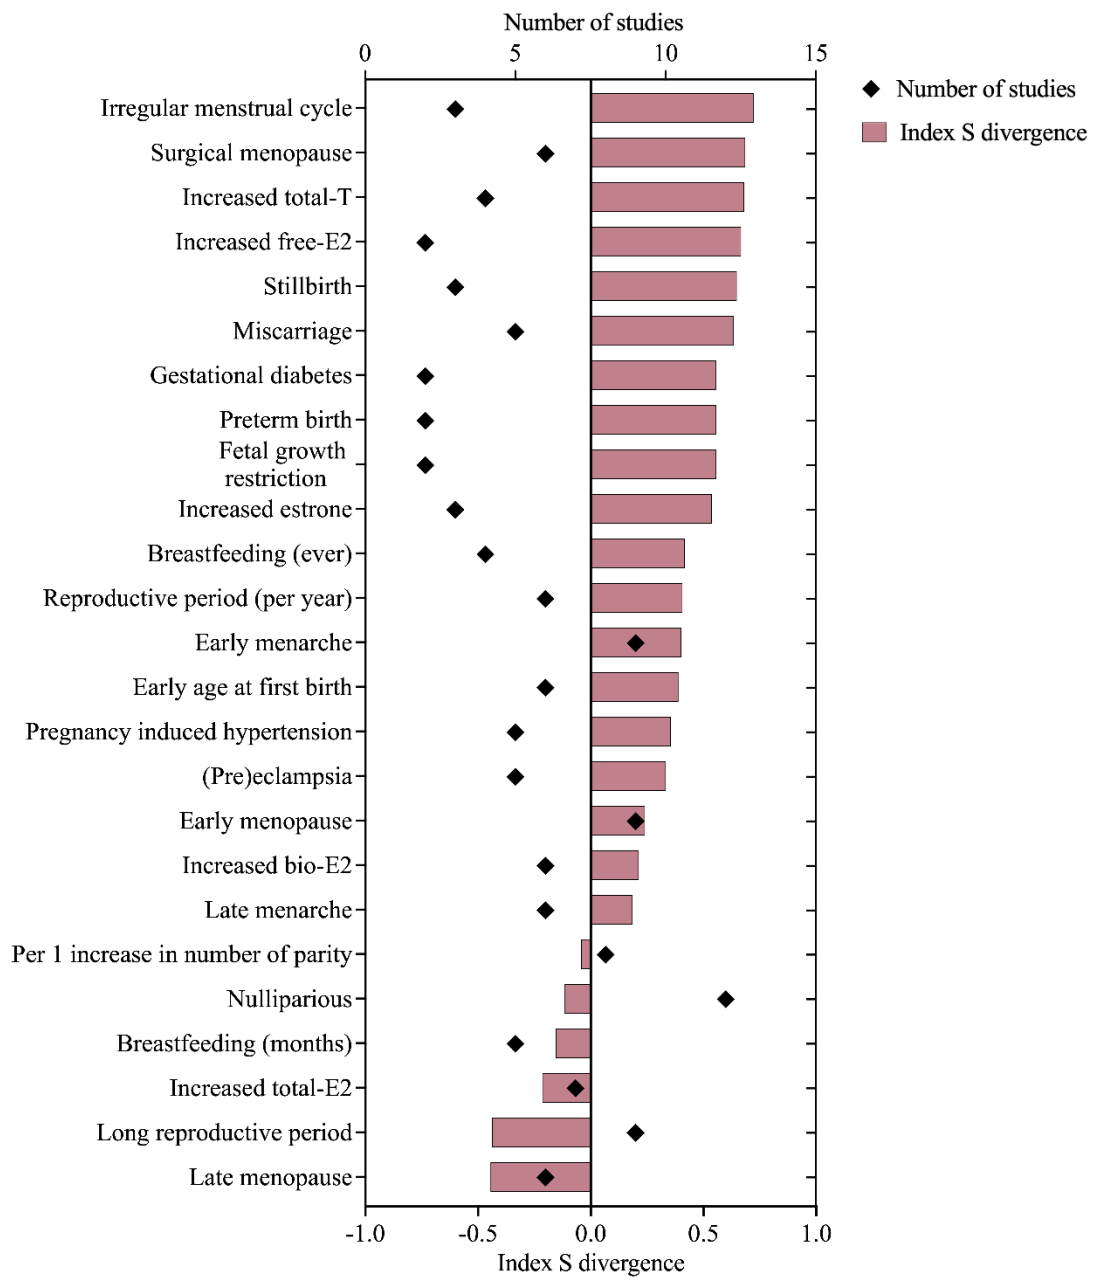

2. Results of index S divergence in male-specific reproductive factors.

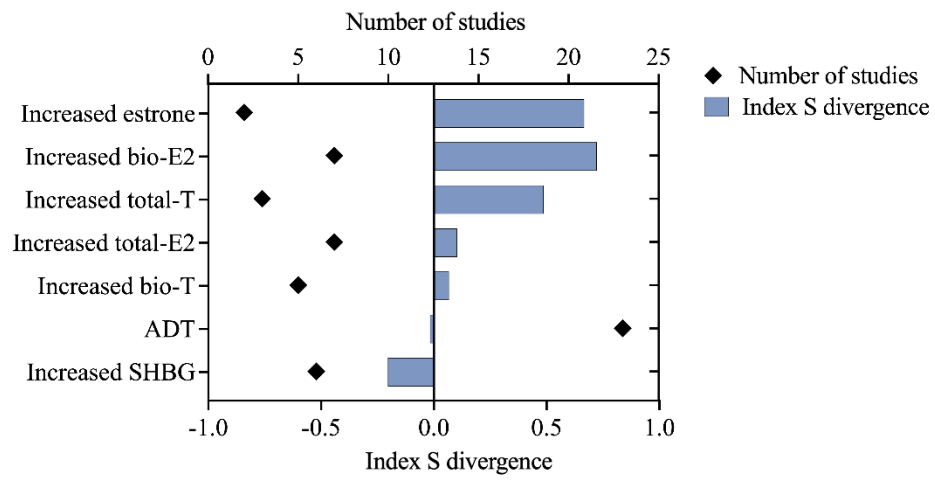

Supplement: MOESM1 [file 26349562]
